# Supplementary material for: CNA profiling of single CTCs in locally advanced esophageal cancer patients during therapy highlights unexplored molecular pathways.
Source: Research Square preprint supplement (doi:10.21203/rs.3.rs-850357/v1), 2021-08-31
Supplement: Supplementary file 2 [file 0a253c5e926a434f13cbc653.xlsx]

## Sheet: Sheet 1
enrichr.term	db	total.genes.in.pathway	Freq	samples	genes
eosinophil chemotaxis (GO:0048245)	GO_Biological_Process_2018	82	13	10B13_CNV_3;10B9_CNV_3;16A1_CNV_4;16B1_CNV_4;16B3_CNV_4;5A4_CNV_2;7C5_CNV_4;NM2c1_LowPass_4;NM3a3_LowPass_2;NM4b4_LowPass_4;NM4b9_LowPass_4;NM7a6_LowPass_3;NM7a7_LowPass_3	CCL1;CCL11;CCL13;CCL14;CCL15;CCL16;CCL18;CCL2;CCL23;CCL24;CCL26;CCL3;CCL3L1;CCL4;CCL4L1;CCL5;CCL7;CCL8;CX3CL1;LGALS3;SCG2;XCL1;XCL2
eosinophil migration (GO:0072677)	GO_Biological_Process_2018	82	13	10B13_CNV_3;10B9_CNV_3;16A1_CNV_4;16B1_CNV_4;16B3_CNV_4;5A4_CNV_2;7C5_CNV_4;NM2c1_LowPass_4;NM3a3_LowPass_2;NM4b4_LowPass_4;NM4b9_LowPass_4;NM7a6_LowPass_3;NM7a7_LowPass_3	CCL1;CCL11;CCL13;CCL14;CCL15;CCL16;CCL18;CCL2;CCL23;CCL24;CCL26;CCL3;CCL3L1;CCL4;CCL4L1;CCL5;CCL7;CCL8;CX3CL1;LGALS3;SCG2;XCL1;XCL2
lymphocyte activation involved in immune response (GO:0002285)	GO_Biological_Process_2018	74	12	10B13_CNV_3;10B6_CNV_2;10C3_CNV_1;10C5_CNV_1;16B3b_CNV_4;5A4_CNV_2;NM2c2_LowPass_4;NM3a3_LowPass_2;NM3a4_LowPass_2;NM4b1_LowPass_4;NM4b4_LowPass_4;NM6b1_LowPass_2	CD1C;CD244;EIF2AK4;F2RL1;GPR183;IFNA1;IFNA10;IFNA14;IFNA16;IFNA17;IFNA2;IFNA21;IFNA4;IFNA5;IFNA6;IFNA7;IFNA8;IFNB1;IFNE;IFNK;IFNW1;LCP1
type I interferon receptor binding (GO:0005132)	GO_Molecular_Function_2018	47	11	10B6_CNV_2;10C3_CNV_1;10C5_CNV_1;16B3b_CNV_4;5A4_CNV_2;NM2c2_LowPass_4;NM3a3_LowPass_2;NM3a4_LowPass_2;NM4b1_LowPass_4;NM4b4_LowPass_4;NM6b1_LowPass_2	IFNA1;IFNA10;IFNA14;IFNA16;IFNA17;IFNA2;IFNA21;IFNA4;IFNA5;IFNA6;IFNA7;IFNA8;IFNB1;IFNE;IFNK;IFNW1
positive regulation of peptidyl-serine phosphorylation of STAT protein (GO:0033141)	GO_Biological_Process_2018	58	11	10B6_CNV_2;10C3_CNV_1;10C5_CNV_1;16B3b_CNV_4;5A4_CNV_2;NM2c2_LowPass_4;NM3a3_LowPass_2;NM3a4_LowPass_2;NM4b1_LowPass_4;NM4b4_LowPass_4;NM6b1_LowPass_2	IFNA1;IFNA10;IFNA14;IFNA16;IFNA17;IFNA2;IFNA21;IFNA4;IFNA5;IFNA6;IFNA7;IFNA8;IFNB1;IFNE;IFNG;IFNK;IFNW1;LIF
regulation of peptidyl-serine phosphorylation of STAT protein (GO:0033139)	GO_Biological_Process_2018	58	11	10B6_CNV_2;10C3_CNV_1;10C5_CNV_1;16B3b_CNV_4;5A4_CNV_2;NM2c2_LowPass_4;NM3a3_LowPass_2;NM3a4_LowPass_2;NM4b1_LowPass_4;NM4b4_LowPass_4;NM6b1_LowPass_2	IFNA1;IFNA10;IFNA14;IFNA16;IFNA17;IFNA2;IFNA21;IFNA4;IFNA5;IFNA6;IFNA7;IFNA8;IFNB1;IFNE;IFNG;IFNK;IFNW1;LIF
natural killer cell activation involved in immune response (GO:0002323)	GO_Biological_Process_2018	69	11	10B6_CNV_2;10C3_CNV_1;10C5_CNV_1;16B3b_CNV_4;5A4_CNV_2;NM2c2_LowPass_4;NM3a3_LowPass_2;NM3a4_LowPass_2;NM4b1_LowPass_4;NM4b4_LowPass_4;NM6b1_LowPass_2	CORO1A;IFNA1;IFNA10;IFNA14;IFNA16;IFNA17;IFNA2;IFNA21;IFNA4;IFNA5;IFNA6;IFNA7;IFNA8;IFNB1;IFNE;IFNK;IFNW1
response to dsRNA (GO:0043331)	GO_Biological_Process_2018	82	11	10B6_CNV_2;10C3_CNV_1;10C5_CNV_1;16B3b_CNV_4;5A4_CNV_2;NM2c2_LowPass_4;NM3a3_LowPass_2;NM3a4_LowPass_2;NM4b1_LowPass_4;NM4b4_LowPass_4;NM6b1_LowPass_2	IFNA1;IFNA10;IFNA14;IFNA16;IFNA17;IFNA2;IFNA21;IFNA4;IFNA5;IFNA6;IFNA7;IFNA8;IFNB1;IFNE;IFNK;IFNW1;PDE12;RFTN1;RIOK3;TICAM1;TLR3
T cell activation involved in immune response (GO:0002286)	GO_Biological_Process_2018	87	11	10B13_CNV_3;10B6_CNV_2;10C3_CNV_1;10C5_CNV_1;16B3b_CNV_4;NM2c2_LowPass_4;NM3a3_LowPass_2;NM3a4_LowPass_2;NM4b1_LowPass_4;NM4b4_LowPass_4;NM6b1_LowPass_2	CD1C;EIF2AK4;F2RL1;FCER1G;ICAM1;IFNA1;IFNA10;IFNA14;IFNA16;IFNA17;IFNA2;IFNA21;IFNA4;IFNA5;IFNA6;IFNA7;IFNA8;IFNB1;IFNE;IFNK;IFNW1;ITGAL;LCP1;LILRB1;SLC11A1;TNFSF18
B cell proliferation (GO:0042100)	GO_Biological_Process_2018	92	11	10B6_CNV_2;10C3_CNV_1;10C5_CNV_1;16B3b_CNV_4;5A4_CNV_2;NM2c2_LowPass_4;NM3a3_LowPass_2;NM3a4_LowPass_2;NM4b1_LowPass_4;NM4b4_LowPass_4;NM6b1_LowPass_2	CD40LG;CD79A;CR2;CTPS1;GAPT;HSPD1;IFNA1;IFNA10;IFNA14;IFNA16;IFNA17;IFNA2;IFNA21;IFNA4;IFNA5;IFNA6;IFNA7;IFNA8;IFNB1;IFNE;IFNK;IFNW1;IL10;LEF1;MEF2C;MS4A1;PTPRC
lymphocyte proliferation (GO:0046651)	GO_Biological_Process_2018	106	11	10B6_CNV_2;10C3_CNV_1;10C5_CNV_1;16B3b_CNV_4;5A4_CNV_2;NM2c2_LowPass_4;NM3a3_LowPass_2;NM3a4_LowPass_2;NM4b1_LowPass_4;NM4b4_LowPass_4;NM6b1_LowPass_2	CD40LG;CD79A;CR2;CTPS1;ELF4;FLT3;HELLS;HSPD1;IFNA1;IFNA10;IFNA14;IFNA16;IFNA17;IFNA2;IFNA21;IFNA4;IFNA5;IFNA6;IFNA7;IFNA8;IFNB1;IFNE;IFNK;IFNW1;IL10;LEF1;MEF2C;MS4A1;MSN;PIK3CG;PPP3CB;PTPRC;TNFRSF4;TNFSF14
Herpes simplex virus 1 infection	KEGG_2019_Human	125	11	10B13_CNV_3;10C2_CNV_1;16A1_CNV_4;16B3_CNV_4;5A12_CNV_3;5A3_CNV_2;NM3a1_LowPass_2;NM4a2_LowPass_3;NM4b1_LowPass_4;NM4b10_LowPass_4;NM4b3_LowPass_4	AKT1;AKT2;AKT3;APAF1;B2M;BAD;BAK1;BAX;BCL2;BCL2L1;BID;BIRC2;BIRC3;BST2;C3;C5;CALR;CARD9;CASP3;CASP8;CCL2;CCL5;CD74;CFP;CHUK;DAXX;DDX58;EIF2AK2;EIF2AK3;EIF2AK4;EIF2B1;EIF2B2;EIF2B3;EIF2B4;EIF2B5;EIF2S1;EIF4EBP1;FADD;FASLG;HCFC1;HKR1;HLA-A;HLA-B;HLA-C;HLA-DMA;HLA-DMB;HLA-DOA;HLA-DOB;HLA-DPA1;HLA-DPB1;HLA-DQA1;HLA-DQA2;HLA-DQB1;HLA-DRA;HLA-DRB1;HLA-DRB5;HLA-E;HLA-F;HLA-G;IFIH1;IFNA1;IFNA10;IFNA13;IF…
Cytokine-cytokine receptor interaction	KEGG_2019_Human	91	10	10B18_CNV_3;10B6_CNV_2;10C3_CNV_1;10C5_CNV_1;16B1_CNV_4;16B3b_CNV_4;5A4_CNV_2;NM3a4_LowPass_2;NM4b4_LowPass_4;NM6b1_LowPass_2	ACKR3;ACKR4;ACVR1;ACVR1B;ACVR1C;ACVR2A;ACVR2B;ACVRL1;AMH;AMHR2;BMP10;BMP15;BMP2;BMP3;BMP4;BMP5;BMP6;BMP7;BMPR1A;BMPR1B;BMPR2;CCL1;CCL11;CCL13;CCL14;CCL15;CCL16;CCL18;CCL19;CCL2;CCL20;CCL21;CCL23;CCL24;CCL25;CCL26;CCL27;CCL28;CCL3;CCL3L1;CCL3L3;CCL4;CCL4L1;CCL4L2;CCL5;CCL7;CCL8;CCR1;CCR10;CCR2;CCR3;CCR4;CCR5;CCR6;CCR7;CCR8;CCR9;CD27;CD4;CD40LG;CD70;CLCF1;CNTF;CNTFR;CRLF2;CSF1R;CSF2;CSF2RA;CSF2RB;C…
olfactory receptor activity (GO:0004984)	GO_Molecular_Function_2018	94	10	10B16_CNV_2;10C1_CNV_1;16B1_CNV_4;16B3_CNV_4;5A12_CNV_3;5A3_CNV_2;5A7_CNV_2;NM3a3_LowPass_2;NM4b9_LowPass_4;NM6b3_LowPass_2	OR10A2;OR10A3;OR10A4;OR10A5;OR10A6;OR10A7;OR10AD1;OR10AG1;OR10C1;OR10G4;OR10G7;OR10G8;OR10G9;OR10P1;OR10Q1;OR10S1;OR10V1;OR10W1;OR11L1;OR13A1;OR13C2;OR13C3;OR13C4;OR13C5;OR13C8;OR13C9;OR13D1;OR13H1;OR13J1;OR14A16;OR14C36;OR14I1;OR14J1;OR1A1;OR1A2;OR1B1;OR1C1;OR1D2;OR1D5;OR1E1;OR1F1;OR1J1;OR1J2;OR1J4;OR1K1;OR1L1;OR1L3;OR1L4;OR1L6;OR1L8;OR1M1;OR1Q1;OR2A1;OR2A12;OR2A14;OR2A2;OR2A5;OR2AE1;OR2AG1;OR2A…
response to exogenous dsRNA (GO:0043330)	GO_Biological_Process_2018	101	10	10B6_CNV_2;10C3_CNV_1;10C5_CNV_1;5A4_CNV_2;NM2c2_LowPass_4;NM3a3_LowPass_2;NM3a4_LowPass_2;NM4b1_LowPass_4;NM4b4_LowPass_4;NM6b1_LowPass_2	CAV1;COLEC12;DDX58;FLOT1;IFIH1;IFIT1;IFNA1;IFNA10;IFNA14;IFNA16;IFNA17;IFNA2;IFNA21;IFNA4;IFNA5;IFNA6;IFNA7;IFNA8;IFNB1;IFNE;IFNK;IFNW1;MAVS;MUL1;PQBP1;RALB;RFTN1;TICAM1;TLR3
TRAF6 mediated IRF7 activation_Homo sapiens_R-HSA-933541	Reactome_2016	95	9	10B6_CNV_2;10C3_CNV_1;10C5_CNV_1;NM2c2_LowPass_4;NM3a3_LowPass_2;NM3a4_LowPass_2;NM4b1_LowPass_4;NM4b4_LowPass_4;NM6b1_LowPass_2	CREBBP;DDX58;DHX36;EP300;IFIH1;IFNA1;IFNA10;IFNA14;IFNA16;IFNA17;IFNA2;IFNA21;IFNA4;IFNA5;IFNA6;IFNA7;IFNA8;IFNB1;IKBKE;IRF1;IRF2;IRF3;IRF7;MAVS;MYD88;RNF135;SIKE1;TANK;TRAF2;TRAF6
CCR chemokine receptor binding (GO:0048020)	GO_Molecular_Function_2018	108	9	10B9_CNV_3;16A1_CNV_4;16B1_CNV_4;16B3_CNV_4;5A4_CNV_2;5A7_CNV_2;NM2c1_LowPass_4;NM3a3_LowPass_2;NM4b9_LowPass_4	CCL1;CCL11;CCL13;CCL14;CCL15;CCL16;CCL17;CCL18;CCL19;CCL2;CCL20;CCL21;CCL22;CCL23;CCL24;CCL25;CCL26;CCL27;CCL3;CCL3L1;CCL4;CCL4L1;CCL5;CCL7;CCL8;CCR2;CCRL2;CNIH4;CX3CL1;CXCL13;DEFB1;DEFB103A;DEFB106A;DEFB4A;XCL1;XCL2
Olfactory Signaling Pathway_Homo sapiens_R-HSA-381753	Reactome_2016	112	9	10B16_CNV_2;10C1_CNV_1;16B1_CNV_4;16B3_CNV_4;5A12_CNV_3;5A3_CNV_2;5A7_CNV_2;NM4b9_LowPass_4;NM6b3_LowPass_2	GNAL;GNGT1;OR10A2;OR10A3;OR10A4;OR10A5;OR10A6;OR10A7;OR10AD1;OR10AG1;OR10C1;OR10G4;OR10G7;OR10G8;OR10G9;OR10H1;OR10H2;OR10H3;OR10H4;OR10H5;OR10J1;OR10J3;OR10J5;OR10K1;OR10K2;OR10P1;OR10Q1;OR10R2;OR10S1;OR10T2;OR10V1;OR10W1;OR10X1;OR10Z1;OR11A1;OR11H1;OR11L1;OR12D2;OR12D3;OR13A1;OR13C2;OR13C3;OR13C4;OR13C5;OR13C8;OR13C9;OR13D1;OR13G1;OR13H1;OR13J1;OR14A16;OR14C36;OR14I1;OR14J1;OR1A1;OR1A2;OR1B1;OR…
Olfactory transduction	KEGG_2019_Human	117	9	10B16_CNV_2;10C1_CNV_1;16B1_CNV_4;16B3_CNV_4;5A12_CNV_3;5A3_CNV_2;5A7_CNV_2;NM4b9_LowPass_4;NM6b3_LowPass_2	ADCY3;ANO2;ARRB1;ARRB2;CALM1;CALM2;CALM3;CALML3;CALML4;CALML5;CAMK2A;CAMK2B;CAMK2D;CAMK2G;CNGA2;CNGA3;CNGA4;CNGB1;GNAL;GNG13;GNG7;GUCY2D;NCALD;OR10A2;OR10A3;OR10A4;OR10A5;OR10A6;OR10A7;OR10AD1;OR10AG1;OR10C1;OR10G4;OR10G7;OR10G8;OR10G9;OR10H1;OR10H2;OR10H3;OR10H4;OR10H5;OR10J1;OR10J3;OR10J5;OR10K1;OR10K2;OR10P1;OR10Q1;OR10R2;OR10S1;OR10T2;OR10V1;OR10W1;OR10X1;OR10Z1;OR11A1;OR11H1;OR11L1;OR12D2;OR…
Generic Transcription Pathway_Homo sapiens_R-HSA-212436	Reactome_2016	170	9	10B13_CNV_3;10B6_CNV_2;16A1_CNV_4;16B3_CNV_4;5A12_CNV_3;NM4a2_LowPass_3;NM4b1_LowPass_4;NM4b10_LowPass_4;NM4b3_LowPass_4	AGO1;AGO3;AGO4;AIFM2;AKT1;AKT2;APAF1;AR;ARID3A;ATF2;ATM;ATP1B4;ATR;ATRIP;AURKA;AURKB;BANP;BARD1;BAX;BBC3;BCL6;BIRC5;BLM;BNIP3L;BRCA1;BRD1;BRD7;BRIP1;BRPF1;BTG2;CARM1;CASP1;CASP10;CASP2;CASP6;CCNA1;CCNB1;CCNC;CCNE1;CCNE2;CCNG1;CCNH;CCNK;CCNT2;CDC25C;CDK1;CDK12;CDK13;CDK2;CDK5;CDK5R1;CDK7;CDK8;CDK9;CDKN1B;CDKN2A;CDKN2B;CENPJ;CHD3;CHD9;CHEK1;CHM;CNOT1;CNOT10;CNOT11;CNOT2;CNOT3;CNOT4;CNOT6;CNOT6L;CNO…
GPCR downstream signaling_Homo sapiens_R-HSA-388396	Reactome_2016	187	9	10B16_CNV_2;10C1_CNV_1;16B1_CNV_4;16B3_CNV_4;5A12_CNV_3;5A3_CNV_2;5A7_CNV_2;NM6b2_LowPass_2;NM6b3_LowPass_2	ABHD12;ABHD6;ABR;ACKR3;ADCY1;ADCY2;ADCY3;ADCY5;ADCY6;ADCY7;ADCY8;ADCY9;ADCYAP1;ADCYAP1R1;ADM;ADM2;ADORA1;ADORA2A;ADORA2B;ADORA3;ADRA1A;ADRA1B;ADRA1D;ADRA2A;ADRA2B;ADRA2C;ADRB1;ADRB2;ADRB3;ADRBK1;ADRBK2;AGT;AGTR1;AGTR2;AKAP13;AKT2;AKT3;ANXA1;APLN;APLNR;APP;ARHGAP4;ARHGEF1;ARHGEF11;ARHGEF12;ARHGEF17;ARHGEF18;ARHGEF2;ARHGEF25;ARHGEF3;ARHGEF4;ARHGEF6;ARHGEF7;ARHGEF9;ARRB1;ARRB2;AVP;AVPR1A;AVPR1B;AVPR…
cytokine activity (GO:0005125)	GO_Molecular_Function_2018	38	8	10B6_CNV_2;10C5_CNV_1;16B3b_CNV_4;5A4_CNV_2;NM2c1_LowPass_4;NM3a4_LowPass_2;NM4b4_LowPass_4;NM6b1_LowPass_2	ADIPOQ;AIMP1;BMP10;BMP15;BMP2;BMP3;BMP4;BMP5;BMP6;BMP7;C5;CCL1;CCL11;CCL13;CCL14;CCL15;CCL16;CCL18;CCL19;CCL2;CCL20;CCL21;CCL23;CCL28;CCL3;CCL3L1;CCL4;CCL4L1;CCL5;CCL7;CCL8;CKLF;CLCF1;CNTF;CSF3;CXCL1;CXCL10;CXCL11;CXCL12;CXCL13;CXCL16;CXCL2;CXCL3;CXCL5;CXCL6;CXCL9;EDN1;EPO;FAM3D;FGF2;GDF10;GDF11;GDF2;GDF6;GDF7;HMGB1;IFNA1;IFNA10;IFNA14;IFNA16;IFNA17;IFNA2;IFNA21;IFNA4;IFNA5;IFNA6;IFNA7;IFNA8;IFNB…
Regulation of IFNA signaling_Homo sapiens_R-HSA-912694	Reactome_2016	82	8	10C3_CNV_1;10C5_CNV_1;NM2c2_LowPass_4;NM3a3_LowPass_2;NM3a4_LowPass_2;NM4b1_LowPass_4;NM4b4_LowPass_4;NM6b1_LowPass_2	IFNA1;IFNA10;IFNA14;IFNA16;IFNA17;IFNA2;IFNA21;IFNA4;IFNA5;IFNA6;IFNA7;IFNA8;IFNAR1;IFNAR2;IFNB1;PTPN1;SOCS3;STAT2;TYK2;USP18
natural killer cell activation (GO:0030101)	GO_Biological_Process_2018	106	8	10B6_CNV_2;10C3_CNV_1;10C5_CNV_1;NM2c2_LowPass_4;NM3a4_LowPass_2;NM4b1_LowPass_4;NM4b4_LowPass_4;NM6b1_LowPass_2	BAG6;CD2;ELF4;HNF1A;IFNA1;IFNA10;IFNA14;IFNA16;IFNA17;IFNA2;IFNA21;IFNA4;IFNA5;IFNA6;IFNA7;IFNA8;IFNB1;IFNE;IFNK;IFNW1;IL12B;IL21R;NCR1;NCR3;PIK3CD;PRDX1;SNX27;ULBP1;ULBP2;ULBP3
monocyte chemotaxis (GO:0002548)	GO_Biological_Process_2018	114	8	10B13_CNV_3;16A1_CNV_4;16B1_CNV_4;16B3_CNV_4;NM2c1_LowPass_4;NM3a3_LowPass_2;NM4b4_LowPass_4;NM4b9_LowPass_4	ANXA1;CALCA;CCL1;CCL11;CCL13;CCL14;CCL15;CCL16;CCL17;CCL18;CCL19;CCL2;CCL20;CCL21;CCL22;CCL23;CCL24;CCL25;CCL26;CCL3;CCL3L1;CCL4;CCL4L1;CCL5;CCL7;CCL8;CX3CL1;DEFB104A;FLT1;IL6R;PDGFB;PTPRO;RPS19;S100A12;TNFSF11;XCL1;XCL2
Autoimmune thyroid disease	KEGG_2019_Human	133	8	10B18_CNV_3;10C3_CNV_1;10C5_CNV_1;NM2c2_LowPass_4;NM3a4_LowPass_2;NM4b1_LowPass_4;NM4b4_LowPass_4;NM6b1_LowPass_2	CD28;CD40LG;CD80;CD86;CGA;CTLA4;FAS;GZMB;HLA-A;HLA-B;HLA-C;HLA-DMA;HLA-DMB;HLA-DOA;HLA-DOB;HLA-DPA1;HLA-DPB1;HLA-DQA1;HLA-DQA2;HLA-DQB1;HLA-DRA;HLA-DRB1;HLA-DRB5;HLA-E;HLA-F;HLA-G;IFNA1;IFNA10;IFNA13;IFNA14;IFNA16;IFNA17;IFNA2;IFNA21;IFNA4;IFNA5;IFNA6;IFNA7;IFNA8;IL10;IL4;IL5;PRF1;TG;TPO;TSHB;TSHR
Cytosolic DNA-sensing pathway	KEGG_2019_Human	146	8	10C3_CNV_1;10C5_CNV_1;5A4_CNV_2;NM2c2_LowPass_4;NM3a4_LowPass_2;NM4b1_LowPass_4;NM4b4_LowPass_4;NM6b1_LowPass_2	AIM2;CASP1;CCL4;CCL4L1;CCL4L2;CCL5;CHUK;CXCL10;DDX58;IFNA1;IFNA10;IFNA13;IFNA14;IFNA16;IFNA17;IFNA2;IFNA21;IFNA4;IFNA5;IFNA6;IFNA7;IFNA8;IFNB1;IKBKE;IL18;IL1B;IL33;IRF3;MAVS;NFKB1;NFKBIA;NFKBIB;POLR1D;POLR2E;POLR2F;POLR2H;POLR2K;POLR3A;POLR3B;POLR3C;POLR3D;POLR3F;POLR3G;POLR3GL;POLR3H;PYCARD;RELA;RIPK1;RIPK3;TREX1;ZBP1
RIG-I-like receptor signaling pathway	KEGG_2019_Human	155	8	10B6_CNV_2;10C3_CNV_1;10C5_CNV_1;NM2c2_LowPass_4;NM3a4_LowPass_2;NM4b1_LowPass_4;NM4b4_LowPass_4;NM6b1_LowPass_2	ATG12;ATG5;AZI2;CXCL10;CYLD;DDX58;DHX58;FADD;IFIH1;IFNA1;IFNA10;IFNA13;IFNA14;IFNA16;IFNA17;IFNA2;IFNA21;IFNA4;IFNA5;IFNA6;IFNA7;IFNA8;IFNB1;IFNE;IFNK;IFNW1;IKBKE;IL12A;IL12B;IRF3;MAP3K1;MAP3K7;MAPK9;MAVS;NFKB1;NFKBIA;NFKBIB;NLRX1;RELA;RIPK1;SIKE1;TANK;TBKBP1;TNF;TRAF2;TRAF3;TRAF6
Metallothioneins bind metals_Homo sapiens_R-HSA-5661231	Reactome_2016	11	7	10B17_CNV_3;10C1_CNV_1;10C5_CNV_1;10C6_CNV_1;5A3_CNV_2;NM2c2_LowPass_4;NM3a6_LowPass_2	MT1A;MT1B;MT1E;MT1F;MT1G;MT1H;MT1M;MT1X;MT2A;MT3;MT4
Response to metal ions_Homo sapiens_R-HSA-5660526	Reactome_2016	11	7	10B17_CNV_3;10C1_CNV_1;10C5_CNV_1;10C6_CNV_1;5A3_CNV_2;NM2c2_LowPass_4;NM3a6_LowPass_2	MT1A;MT1B;MT1E;MT1F;MT1G;MT1H;MT1M;MT1X;MT2A;MT3;MT4
Signaling by GPCR_Homo sapiens_R-HSA-372790	Reactome_2016	20	7	10B16_CNV_2;10C1_CNV_1;16B1_CNV_4;16B3_CNV_4;5A3_CNV_2;5A7_CNV_2;NM6b3_LowPass_2	ABHD12;ABHD6;ABR;ACKR2;ACKR3;ACKR4;ACTN2;ADCY1;ADCY2;ADCY3;ADCY5;ADCY6;ADCY7;ADCY8;ADCY9;ADCYAP1;ADCYAP1R1;ADM;ADORA1;ADORA2A;ADORA2B;ADORA3;ADRA1A;ADRA1B;ADRA1D;ADRA2A;ADRA2B;ADRA2C;ADRB1;ADRB2;ADRB3;ADRBK1;ADRBK2;AGT;AGTR1;AGTR2;AHCYL1;AKAP13;AKAP9;AKT2;AKT3;ANGPT1;ANXA1;APBB1IP;APLN;APLNR;APP;ARAF;ARHGAP4;ARHGEF1;ARHGEF11;ARHGEF12;ARHGEF17;ARHGEF18;ARHGEF2;ARHGEF25;ARHGEF3;ARHGEF4;ARHGEF6;ARHG…
Estrogen signaling pathway	KEGG_2019_Human	27	7	10B18_CNV_3;16A1_CNV_4;16B1_CNV_4;7C5_CNV_4;NM2c4_LowPass_4;NM4b4_LowPass_4;NM4b9_LowPass_4	ADCY1;ADCY2;ADCY3;ADCY4;ADCY5;ADCY6;ADCY7;ADCY8;AKT3;ATF2;ATF4;ATF6B;BCL2;CALM1;CALM2;CALM3;CALML3;CALML5;CALML6;CREB1;CREB3;CREB3L1;CREB3L2;CREB3L3;CREB3L4;CTSD;EBAG9;EGFR;ESR1;ESR2;FKBP4;FKBP5;FOS;GABBR1;GABBR2;GNAI1;GNAI2;GNAI3;GNAQ;GRB2;GRM1;HBEGF;HRAS;HSP90B1;HSPA1A;HSPA1B;HSPA1L;HSPA2;HSPA8;ITPR1;ITPR2;ITPR3;JUN;KCNJ3;KCNJ6;KRT10;KRT12;KRT13;KRT14;KRT15;KRT16;KRT17;KRT18;KRT19;KRT20;KRT23;K…
interleukin-1 receptor binding (GO:0005149)	GO_Molecular_Function_2018	40	7	10C2_CNV_1;10C5_CNV_1;16B1_CNV_4;16B3_CNV_4;NM3a5_LowPass_2;NM4b3_LowPass_4;NM6b1_LowPass_2	ERAP1;IL1A;IL1B;IL1F10;IL1RN;IL3;IL36A;IL36B;IL36G;IL36RN;IL37;LRRC70;TLR5;TLR9;TRIP6
Signal Transduction_Homo sapiens_R-HSA-162582	Reactome_2016	80	7	10B16_CNV_2;10C1_CNV_1;16B1_CNV_4;16B3_CNV_4;5A3_CNV_2;5A7_CNV_2;NM6b3_LowPass_2	A2M;AATF;ABCA4;ABHD12;ABHD6;ABI1;ABI2;ABR;ACKR2;ACKR3;ACKR4;ACTB;ACTG1;ACTN2;ACTR2;ACTR3;ACVR1B;ACVR1C;ACVR2A;ACVR2B;ADAM10;ADAM12;ADAM17;ADCY1;ADCY10;ADCY2;ADCY3;ADCY5;ADCY6;ADCY7;ADCY8;ADCY9;ADCYAP1;ADCYAP1R1;ADH1A;ADH4;ADM;ADORA1;ADORA2A;ADORA2B;ADORA3;ADRA1A;ADRA1B;ADRA1D;ADRA2A;ADRA2B;ADRA2C;ADRB1;ADRB2;ADRB3;ADRBK1;ADRBK2;AES;AGO2;AGT;AGTR1;AGTR2;AHCTF1;AHCYL1;AKAP13;AKAP9;AKR1B10;AKR1C1;AK…
taste receptor activity (GO:0008527)	GO_Molecular_Function_2018	95	7	10B14_CNV_1;10C6_CNV_1;5A11_CNV_3;7C5_CNV_4;NM4a1_LowPass_3;NM6b2_LowPass_2;NM6b3_LowPass_2	FFAR4;PKD2L1;TAS1R1;TAS1R2;TAS1R3;TAS2R1;TAS2R10;TAS2R13;TAS2R14;TAS2R16;TAS2R19;TAS2R20;TAS2R3;TAS2R30;TAS2R31;TAS2R38;TAS2R39;TAS2R4;TAS2R40;TAS2R41;TAS2R42;TAS2R43;TAS2R46;TAS2R5;TAS2R50;TAS2R60;TAS2R7;TAS2R8;TAS2R9
sensory perception of chemical stimulus (GO:0007606)	GO_Biological_Process_2018	97	7	10B16_CNV_2;10C1_CNV_1;16B1_CNV_4;16B3_CNV_4;5A12_CNV_3;NM6b2_LowPass_2;NM6b3_LowPass_2	ADCY3;BEST2;C5AR1;CD36;DRD2;GFY;GNAL;GNAS;MKKS;OBP2A;OBP2B;OMP;OR10A2;OR10A3;OR10A4;OR10A5;OR10A6;OR10A7;OR10AD1;OR10AG1;OR10C1;OR10G4;OR10G7;OR10G8;OR10G9;OR10J1;OR10J3;OR10K1;OR10K2;OR10P1;OR10Q1;OR10R2;OR10S1;OR10T2;OR10V1;OR10W1;OR10Z1;OR11L1;OR12D2;OR12D3;OR13C2;OR13C3;OR13C4;OR13C5;OR13C8;OR13C9;OR13D1;OR13G1;OR13H1;OR14A16;OR14C36;OR14I1;OR14J1;OR1B1;OR1C1;OR1D2;OR1D5;OR1E1;OR1E2;OR1G1;OR1…
regulation of type I interferon-mediated signaling pathway (GO:0060338)	GO_Biological_Process_2018	110	7	10C3_CNV_1;10C5_CNV_1;NM2c2_LowPass_4;NM3a3_LowPass_2;NM3a4_LowPass_2;NM4b1_LowPass_4;NM4b4_LowPass_4	CACTIN;CDC37;CNOT7;FADD;HSP90AB1;IFNA1;IFNA10;IFNA14;IFNA16;IFNA17;IFNA2;IFNA21;IFNA4;IFNA5;IFNA6;IFNA7;IFNA8;IFNAR1;IFNAR2;IFNB1;MAVS;MUL1;NLRC5;PTPN1;PTPN2;STAT2;TRIM6;TYK2;UBE2K;USP18;WNT5A;ZBP1
lymphocyte chemotaxis (GO:0048247)	GO_Biological_Process_2018	119	7	16A1_CNV_4;16B1_CNV_4;16B3_CNV_4;5A4_CNV_2;NM2c1_LowPass_4;NM3a3_LowPass_2;NM4b9_LowPass_4	ADAM8;CCL1;CCL11;CCL13;CCL14;CCL15;CCL16;CCL17;CCL18;CCL19;CCL2;CCL20;CCL21;CCL22;CCL23;CCL24;CCL25;CCL26;CCL3;CCL3L1;CCL4;CCL4L1;CCL5;CCL7;CCL8;CH25H;CX3CL1;CXCL10;CXCL11;CXCL13;CXCL16;CXCL9;CYP7B1;DEFA1;GAS6;GPR183;PIK3CG;SAA1;XCL1;XCL2
B cell differentiation (GO:0030183)	GO_Biological_Process_2018	133	7	10C3_CNV_1;10C5_CNV_1;NM2c2_LowPass_4;NM3a4_LowPass_2;NM4b1_LowPass_4;NM4b4_LowPass_4;NM6b1_LowPass_2	ADAM17;BLNK;CD79A;CD79B;CEBPG;CLCF1;CR2;FLT3;FNIP1;HDAC4;HDAC5;HDAC9;HHEX;IFNA1;IFNA10;IFNA14;IFNA16;IFNA17;IFNA2;IFNA21;IFNA4;IFNA5;IFNA6;IFNA7;IFNA8;IFNB1;IFNE;IFNK;IFNW1;IL10;IL4;JAK3;KIT;LYL1;MSH2;NFAM1;PLCG2;PTPN2;RAG1;RAG2;TCF3;TPD52;VCAM1
Systemic lupus erythematosus	KEGG_2019_Human	24	6	10B18_CNV_3;10C3_CNV_1;16B3_CNV_4;5A12_CNV_3;5A3_CNV_2;5A7_CNV_2	ACTN1;ACTN4;C1R;C1S;C2;C3;C4A;C4B;C5;C6;C7;C8A;C8B;C8G;C9;CD28;CD40;CD40LG;CD80;CD86;ELANE;FCGR1A;FCGR2A;FCGR3A;FCGR3B;GRIN2A;GRIN2B;H2AFB1;H2AFB2;H2AFB3;H2AFJ;H2AFV;H2AFX;H2AFY;H2AFY2;H2AFZ;H2BFM;H2BFWT;H3F3A;H3F3B;H3F3C;HIST1H2AA;HIST1H2AB;HIST1H2AC;HIST1H2AD;HIST1H2AE;HIST1H2AG;HIST1H2AH;HIST1H2AI;HIST1H2AJ;HIST1H2AK;HIST1H2AL;HIST1H2AM;HIST1H2BA;HIST1H2BB;HIST1H2BC;HIST1H2BD;HIST1H2BE;HIST1H2…
cellular response to interleukin-1 (GO:0071347)	GO_Biological_Process_2018	35	6	10B13_CNV_3;16A1_CNV_4;16B3_CNV_4;NM2c1_LowPass_4;NM4b4_LowPass_4;NM4b9_LowPass_4	ADAMTS12;ADAMTS7;BTRC;CACTIN;CCL1;CCL11;CCL13;CCL14;CCL15;CCL16;CCL17;CCL18;CCL19;CCL2;CCL20;CCL21;CCL22;CCL23;CCL24;CCL25;CCL26;CCL3;CCL3L1;CCL4;CCL4L1;CCL5;CCL7;CCL8;CHUK;CUL1;CX3CL1;DAB2IP;FBXW11;HIF1A;HYAL1;HYAL2;HYAL3;IKBKB;IKBKG;IL1A;IL1B;IL1R1;IL1R2;IL1RAP;IL1RN;IRAK1;MAP2K6;MAP3K3;MAP3K7;MAP3K8;MAPK11;MYD88;NFKB1;NFKBIA;NKX3-1;NLRP7;NOD2;PELI1;PELI3;PLCB1;PSMA1;PSMA2;PSMA4;PSMA5;PSMA6;PSM…
Gene Expression_Homo sapiens_R-HSA-74160	Reactome_2016	45	6	10B13_CNV_3;16B3_CNV_4;5A12_CNV_3;NM4a2_LowPass_3;NM4b10_LowPass_4;NM4b3_LowPass_4	AAAS;AARS;ADAR;ADARB1;ADAT1;ADAT3;AGO1;AGO3;AGO4;AIFM2;AIMP1;AKT1;AKT2;ALKBH8;ANP32A;APAF1;APEH;AR;ARID3A;ARID4B;ASZ1;ATF2;ATM;ATP1B4;ATR;ATRIP;AURKA;AURKB;BANP;BARD1;BAX;BAZ1B;BAZ2A;BBC3;BCAS2;BCL6;BDP1;BIRC5;BLM;BRCA1;BRD1;BRF1;BRF2;BRIP1;BTG2;C1D;C2ORF49;CARM1;CARS;CARS2;CASC3;CASP1;CASP10;CASP2;CASP6;CCAR1;CCNA1;CCNB1;CCNE1;CCNE2;CCNG1;CCNH;CCNK;CCNT2;CD2BP2;CD3EAP;CD44;CDC25C;CDC40;CDK1;CDK1…
NOD-like receptor signaling pathway	KEGG_2019_Human	50	6	10B6_CNV_2;10C3_CNV_1;10C5_CNV_1;NM3a4_LowPass_2;NM4a4_LowPass_3;NM6b1_LowPass_2	ANTXR1;ANTXR2;ATG12;ATG16L1;ATG5;CAMP;CARD16;CARD17;CARD18;CARD6;CARD8;CARD9;CASP1;CASP12;CASP4;CASP5;CASR;CCL2;CTSB;CXCL1;CXCL2;CXCL3;CYBA;DEFA1;DEFA1B;DEFA3;DEFA4;DEFA5;DEFA6;DEFB103A;DEFB103B;DEFB4A;DEFB4B;FADD;GBP1;GBP2;GBP3;GBP4;GBP5;GBP7;HSP90AA1;IFNA1;IFNA10;IFNA13;IFNA14;IFNA16;IFNA17;IFNA2;IFNA21;IFNA4;IFNA5;IFNA6;IFNA7;IFNA8;IFNAR1;IFNAR2;IFNB1;IL18;IL1B;IRF9;ITPR1;JUN;MAP3K7;MAPK9;MEFV…
Alcoholism	KEGG_2019_Human	53	6	10B18_CNV_3;10C3_CNV_1;16B3_CNV_4;5A12_CNV_3;5A3_CNV_2;5A7_CNV_2	ADCY5;ADORA2A;ADORA2B;ARAF;ATF2;ATF4;ATF6B;BDNF;BRAF;CALM1;CALM2;CALM3;CALML4;CAMK4;CAMKK1;CAMKK2;CREB1;CREB3;CREB3L1;CREB3L2;CREB3L3;CREB3L4;CREB5;CRH;DDC;DRD1;DRD2;FOSB;GNAI1;GNAI2;GNAI3;GNAO1;GNAS;GNB2;GNB3;GNB4;GNB5;GNG10;GNG11;GNG12;GNG13;GNG3;GNG4;GNG5;GNG7;GNG8;GNGT1;GNGT2;GRB2;GRIN1;GRIN2A;GRIN2B;GRIN2C;GRIN2D;GRIN3A;GRIN3B;H2AFB1;H2AFB2;H2AFB3;H2AFJ;H2AFV;H2AFX;H2AFY;H2AFY2;H2AFZ;H2BFM;H…
sensory perception of smell (GO:0007608)	GO_Biological_Process_2018	79	6	10B16_CNV_2;10C1_CNV_1;16B1_CNV_4;16B3_CNV_4;5A12_CNV_3;NM6b3_LowPass_2	ADCY3;BEST2;DRD2;GFY;GNAL;MKKS;OBP2B;OMP;OR10A2;OR10A3;OR10A4;OR10A5;OR10A6;OR10A7;OR10AD1;OR10AG1;OR10C1;OR10G4;OR10G7;OR10G8;OR10G9;OR10P1;OR10Q1;OR10S1;OR10V1;OR10W1;OR11L1;OR13C2;OR13C3;OR13C4;OR13C5;OR13C8;OR13C9;OR13D1;OR13H1;OR14A16;OR14C36;OR14I1;OR14J1;OR1C1;OR1Q1;OR2A1;OR2A12;OR2A14;OR2A2;OR2A5;OR2AE1;OR2AG1;OR2AG2;OR2AK2;OR2B11;OR2B2;OR2B3;OR2B6;OR2C3;OR2D2;OR2D3;OR2F1;OR2F2;OR2G2;OR2G…
bitter taste receptor activity (GO:0033038)	GO_Molecular_Function_2018	86	6	10B14_CNV_1;10C6_CNV_1;7C5_CNV_4;NM4a1_LowPass_3;NM6b2_LowPass_2;NM6b3_LowPass_2	TAS2R1;TAS2R10;TAS2R13;TAS2R14;TAS2R16;TAS2R19;TAS2R20;TAS2R3;TAS2R30;TAS2R31;TAS2R38;TAS2R39;TAS2R4;TAS2R40;TAS2R41;TAS2R42;TAS2R43;TAS2R46;TAS2R5;TAS2R50;TAS2R60;TAS2R7;TAS2R8;TAS2R9
Class C/3 (Metabotropic glutamate/pheromone receptors)_Homo sapiens_R-HSA-420499	Reactome_2016	110	6	10B14_CNV_1;5A11_CNV_3;7C5_CNV_4;NM4a1_LowPass_3;NM6b2_LowPass_2;NM6b3_LowPass_2	CASR;GABBR2;GPRC6A;GRM1;GRM3;GRM5;GRM6;GRM7;GRM8;TAS1R1;TAS1R2;TAS1R3;TAS2R1;TAS2R10;TAS2R13;TAS2R14;TAS2R16;TAS2R19;TAS2R20;TAS2R3;TAS2R30;TAS2R31;TAS2R38;TAS2R39;TAS2R4;TAS2R40;TAS2R41;TAS2R42;TAS2R43;TAS2R46;TAS2R5;TAS2R50;TAS2R60;TAS2R7;TAS2R8;TAS2R9
intermediate filament (GO:0005882)	GO_Cellular_Component_2018	122	6	10B18_CNV_3;10C1_CNV_1;10C3_CNV_1;10C5_CNV_1;NM4b4_LowPass_4;NM4b9_LowPass_4	CLIP1;CSNK1A1;DLGAP2;DSP;FBF1;FLG;GPER1;KRT10;KRT13;KRT14;KRT16;KRT18;KRT2;KRT20;KRT3;KRT4;KRT5;KRT6A;KRT7;KRT71;KRT75;KRT76;KRT8;KRT82;KRT84;MICAL1;NARF;NCKIPSD;PKP1;PKP2;PNN;PRPH;SHANK2;TCHP;TLK2
chemokine activity (GO:0008009)	GO_Molecular_Function_2018	122	6	10B13_CNV_3;16B1_CNV_4;16B3_CNV_4;5A4_CNV_2;NM2c1_LowPass_4;NM4b9_LowPass_4	C5;CCL1;CCL11;CCL13;CCL14;CCL15;CCL16;CCL17;CCL18;CCL19;CCL2;CCL20;CCL21;CCL22;CCL23;CCL24;CCL25;CCL26;CCL3;CCL3L1;CCL4;CCL4L1;CCL5;CCL7;CCL8;CX3CL1;CXCL1;CXCL10;CXCL11;CXCL12;CXCL13;CXCL16;CXCL2;CXCL3;CXCL5;CXCL6;CXCL9;PF4;PF4V1;PPBP;XCL1;XCL2
chemokine receptor binding (GO:0042379)	GO_Molecular_Function_2018	128	6	10B13_CNV_3;16B1_CNV_4;16B3_CNV_4;5A4_CNV_2;NM2c1_LowPass_4;NM4b9_LowPass_4	C5;CCL1;CCL11;CCL13;CCL14;CCL15;CCL16;CCL17;CCL18;CCL19;CCL2;CCL20;CCL21;CCL22;CCL23;CCL24;CCL25;CCL26;CCL3;CCL3L1;CCL4;CCL4L1;CCL5;CCL7;CCL8;CCRL2;CX3CL1;CXCL1;CXCL10;CXCL11;CXCL12;CXCL13;CXCL16;CXCL2;CXCL3;CXCL5;CXCL6;CXCL9;ITCH;PF4;PF4V1;PPBP;XCL1;XCL2
chemokine-mediated signaling pathway (GO:0070098)	GO_Biological_Process_2018	133	6	10B13_CNV_3;16B1_CNV_4;16B3_CNV_4;5A4_CNV_2;NM2c1_LowPass_4;NM4b9_LowPass_4	ACKR3;CCL1;CCL11;CCL13;CCL14;CCL15;CCL16;CCL17;CCL18;CCL19;CCL2;CCL20;CCL21;CCL22;CCL23;CCL24;CCL25;CCL26;CCL3;CCL3L1;CCL4;CCL4L1;CCL5;CCL7;CCL8;CCR1;CCR2;CIB1;CX3CL1;CXCL1;CXCL10;CXCL11;CXCL12;CXCL13;CXCL2;CXCL3;CXCL5;CXCL6;CXCL9;FOXC1;GPR35;GPR75;PF4;PF4V1;PPBP;TFF2;THPO;XCL1;XCL2
neutrophil chemotaxis (GO:0030593)	GO_Biological_Process_2018	135	6	10B13_CNV_3;16B1_CNV_4;16B3_CNV_4;NM2c1_LowPass_4;NM4b4_LowPass_4;NM4b9_LowPass_4	CCL1;CCL11;CCL13;CCL14;CCL15;CCL16;CCL17;CCL18;CCL19;CCL2;CCL20;CCL21;CCL22;CCL23;CCL24;CCL25;CCL26;CCL3;CCL3L1;CCL4;CCL4L1;CCL5;CCL7;CCL8;CX3CL1;CXCL3;CXCL6;CXCR2;EDN2;EDN3;FCER1G;GBF1;ITGB2;NCKAP1L;PDE4B;PIK3CD;PIK3CG;PIP5K1C;PLA2G1B;S100A12;S100A8;S100A9;SAA1;SYK;TGFB2;XCL1;XCL2
keratinocyte differentiation (GO:0030216)	GO_Biological_Process_2018	142	6	10B11_CNV_1;10B13_CNV_3;10B16_CNV_2;10C6_CNV_1;NM4b4_LowPass_4;NM6b2_LowPass_2	ACER1;ADAM9;AKR1C3;ANXA1;CASP3;CERS3;CLIC4;CSTA;EPHA2;EREG;EVPL;EXPH5;FLG;IVL;JAG1;KRT10;KRT16;LCE1A;LCE1B;LCE1C;LCE1D;LCE1E;LCE1F;LCE2A;LCE2B;LCE2C;LCE2D;LCE3A;LCE3B;LCE3C;LCE3D;LCE3E;LCE4A;LCE5A;LELP1;LOR;MBD4;PIP5K1A;PRR9;S100A7;SCEL;SPRR1A;SPRR1B;SPRR2A;SPRR2B;SPRR2D;SPRR2E;SPRR2F;SPRR2G;SPRR3;SPRR4;ST14;TGM1;TGM3;TXNIP;WNT16;WNT5A
T cell activation (GO:0042110)	GO_Biological_Process_2018	178	6	10B6_CNV_2;10C3_CNV_1;10C5_CNV_1;NM3a3_LowPass_2;NM3a4_LowPass_2;NM6b1_LowPass_2	BLK;CCL19;CCL21;CCR7;CD276;CD3D;CD3E;CD3G;CD7;CD8A;CD8B;CTPS1;CXADR;DDOST;DLL4;DPP4;EIF2AK4;F2RL1;FYN;GPR18;HSPD1;IFNA1;IFNA10;IFNA14;IFNA16;IFNA17;IFNA2;IFNA21;IFNA4;IFNA5;IFNA6;IFNA7;IFNA8;IFNB1;IFNE;IFNK;IFNW1;IL4;INS;ITK;JAG2;KIF13B;KIT;LCK;LCP1;LEP;MICA;MICB;NCK1;NCK2;NHEJ1;PIK3CG;PPP3CA;PRLR;PTPN2;PTPRC;TNFRSF4;TNFSF14;TXK;ZAP70
Toll-like receptor signaling pathway	KEGG_2019_Human	6	5	10C5_CNV_1;5A4_CNV_2;NM3a4_LowPass_2;NM4b1_LowPass_4;NM4b4_LowPass_4	AKT2;AKT3;CCL3;CCL3L1;CCL3L3;CCL4;CCL4L1;CCL4L2;CCL5;CD80;CD86;CHUK;CTSK;CXCL10;CXCL11;CXCL9;FADD;IFNA1;IFNA10;IFNA13;IFNA14;IFNA16;IFNA17;IFNA2;IFNA21;IFNA4;IFNA5;IFNA6;IFNA7;IFNA8;IFNAR1;IFNAR2;IFNB1;IKBKE;IL12A;IL1B;IRF3;JUN;LY96;MAP2K3;MAP2K4;MAP3K8;MAPK10;MAPK8;MAPK9;MYD88;NFKB1;NFKBIA;PIK3CA;PIK3CB;PIK3R1;PIK3R2;PIK3R3;RELA;RIPK1;SPP1;TAB1;TIRAP;TLR1;TLR3;TLR6;TLR7;TLR8;TLR9;TRAF6
integral component of plasma membrane (GO:0005887)	GO_Cellular_Component_2018	31	5	10B14_CNV_1;10B16_CNV_2;5A11_CNV_3;5A3_CNV_2;7C5_CNV_4	ABCA1;ABCB11;ABCB4;ABCB5;ABCC10;ABCC11;ABCC2;ABCC3;ABCC4;ABCC5;ABCC8;ABCC9;ABCG5;ABCG8;ACKR2;ACKR4;ACVR1;ACVR1B;ACVR1C;ACVR2A;ACVR2B;ACVRL1;ADAM17;ADAM2;ADAM23;ADAM29;ADAM8;ADCY1;ADCY2;ADCY3;ADCYAP1R1;ADORA1;ADORA2A;ADORA2B;ADORA3;ADRA1A;ADRA1B;ADRA1D;ADRA2A;ADRA2B;ADRA2C;ADRB1;ADRB2;ADRB3;ADRM1;AGER;AGTR1;AGTR2;AJAP1;ALCAM;ALK;ANKH;APCDD1;APH1A;APLNR;APOM;APP;AQP1;AQP2;AQP4;AQP5;AQP6;AQP7;ART1;A…
JAK-STAT signaling pathway	KEGG_2019_Human	43	5	10C3_CNV_1;NM2c2_LowPass_4;NM3a4_LowPass_2;NM4b1_LowPass_4;NM4b4_LowPass_4	AKT2;AKT3;CCND1;CISH;CNTFR;CREBBP;CRLF2;CSF2;CSF2RA;CSF2RB;CSF3;CSH1;CSH2;CTF1;EGFR;EP300;EPOR;FHL1;GFAP;GH1;GH2;GHR;GRB2;IFNA1;IFNA10;IFNA13;IFNA14;IFNA16;IFNA17;IFNA2;IFNA21;IFNA4;IFNA5;IFNA6;IFNA7;IFNA8;IFNAR1;IFNAR2;IFNB1;IFNE;IFNGR1;IFNGR2;IFNK;IFNL1;IFNL2;IFNL3;IFNLR1;IFNW1;IL10;IL10RA;IL10RB;IL11RA;IL12A;IL12RB1;IL13;IL13RA1;IL13RA2;IL17D;IL19;IL20;IL20RA;IL20RB;IL21R;IL22RA1;IL22RA2;IL23A…
Necroptosis	KEGG_2019_Human	43	5	10C3_CNV_1;NM3a4_LowPass_2;NM4b1_LowPass_4;NM4b4_LowPass_4;NM6b1_LowPass_2	AIFM1;BAX;CAMK2A;CAMK2G;CAPN1;CASP1;CHMP1A;CHMP2B;CHMP3;CHMP4A;CHMP4C;CHMP5;CHMP6;CHMP7;DNM1L;EIF2AK2;FADD;FAF1;FAS;FTL;H2AFJ;H2AFX;H2AFY;H2AFY2;HIST1H2AA;HIST1H2AB;HIST1H2AC;HIST1H2AD;HIST1H2AE;HIST1H2AG;HIST1H2AH;HIST1H2AI;HIST1H2AJ;HIST1H2AK;HIST1H2AL;HIST1H2AM;HIST2H2AA3;HIST2H2AA4;HIST2H2AB;HIST2H2AC;HMGB1;IFNA1;IFNA10;IFNA13;IFNA14;IFNA16;IFNA17;IFNA2;IFNA21;IFNA4;IFNA5;IFNA6;IFNA7;IFNA8;IF…
CXCR chemokine receptor binding (GO:0045236)	GO_Molecular_Function_2018	52	5	10B6_CNV_2;16B3b_CNV_4;5A4_CNV_2;NM6b1_LowPass_2;NM6b3_LowPass_2	CXCL1;CXCL10;CXCL11;CXCL12;CXCL13;CXCL2;CXCL3;CXCL5;CXCL6;CXCL9;PF4;PF4V1;PPBP
Chemokine signaling pathway	KEGG_2019_Human	59	5	10B6_CNV_2;16B1_CNV_4;16B3_CNV_4;5A4_CNV_2;NM2c1_LowPass_4	ADCY1;ADCY2;ADCY3;ADCY4;ADCY5;ADCY9;AKT1;AKT3;ARRB1;BAD;BCAR1;BRAF;CCL1;CCL11;CCL13;CCL14;CCL15;CCL16;CCL17;CCL18;CCL19;CCL2;CCL20;CCL21;CCL22;CCL23;CCL24;CCL25;CCL26;CCL27;CCL28;CCL3;CCL3L1;CCL3L3;CCL4;CCL4L1;CCL4L2;CCL5;CCL7;CCL8;CCR1;CCR10;CCR2;CCR3;CCR4;CCR5;CCR6;CCR7;CCR8;CCR9;CHUK;CX3CL1;CX3CR1;CXCL1;CXCL10;CXCL11;CXCL12;CXCL13;CXCL14;CXCL2;CXCL3;CXCL5;CXCL6;CXCL9;CXCR1;CXCR2;CXCR3;CXCR4;CX…
cellular response to zinc ion (GO:0071294)	GO_Biological_Process_2018	65	5	10B17_CNV_3;10C1_CNV_1;10C5_CNV_1;NM2c2_LowPass_4;NM3a6_LowPass_2	ATP13A2;GLRA1;HVCN1;MT1A;MT1B;MT1E;MT1F;MT1G;MT1H;MT1M;MT1X;MT2A;MT3;MT4;ZNF658
Activated PKN1 stimulates transcription of AR (androgen receptor) regulated genes KLK2 and KLK3_Homo sapiens_R-HSA-5625886	Reactome_2016	101	5	10B18_CNV_3;10C3_CNV_1;16B3_CNV_4;5A12_CNV_3;5A7_CNV_2	AR;H2AFX;H2AFZ;H3F3A;HIST1H2AB;HIST1H2AC;HIST1H2AD;HIST1H2AJ;HIST1H2BA;HIST1H2BB;HIST1H2BC;HIST1H2BD;HIST1H2BH;HIST1H2BK;HIST1H2BL;HIST1H2BM;HIST1H2BN;HIST1H2BO;HIST1H3A;HIST1H4A;HIST2H2AA3;HIST2H2AC;HIST2H2BE;HIST2H3A;HIST3H2BB;KDM4C;KLK2;KLK3;NCOA2;PKN1
SIRT1 negatively regulates rRNA Expression_Homo sapiens_R-HSA-427359	Reactome_2016	102	5	10B18_CNV_3;10C3_CNV_1;16B3_CNV_4;5A12_CNV_3;5A7_CNV_2	H2AFX;H2AFZ;H3F3A;HIST1H2AB;HIST1H2AC;HIST1H2AD;HIST1H2AJ;HIST1H2BA;HIST1H2BB;HIST1H2BC;HIST1H2BD;HIST1H2BH;HIST1H2BK;HIST1H2BL;HIST1H2BM;HIST1H2BN;HIST1H2BO;HIST1H3A;HIST1H4A;HIST2H2AA3;HIST2H2AC;HIST2H2BE;HIST2H3A;HIST3H2BB;RRP8;SIRT1;SUV39H1;TAF1A;TAF1B;TAF1D;TBP
detection of chemical stimulus involved in sensory perception of bitter taste (GO:0001580)	GO_Biological_Process_2018	111	5	10B14_CNV_1;7C5_CNV_4;NM4a1_LowPass_3;NM6b2_LowPass_2;NM6b3_LowPass_2	AZGP1;CST1;CST2;CST4;GNAT3;LPO;PIP;RTP1;RTP2;RTP4;TAS2R1;TAS2R10;TAS2R13;TAS2R14;TAS2R16;TAS2R19;TAS2R20;TAS2R3;TAS2R30;TAS2R31;TAS2R38;TAS2R39;TAS2R4;TAS2R40;TAS2R41;TAS2R42;TAS2R43;TAS2R46;TAS2R5;TAS2R50;TAS2R60;TAS2R7;TAS2R8;TAS2R9
sensory perception of bitter taste (GO:0050913)	GO_Biological_Process_2018	114	5	10B14_CNV_1;7C5_CNV_4;NM4a1_LowPass_3;NM6b2_LowPass_2;NM6b3_LowPass_2	AZGP1;CALHM1;CST1;CST2;CST4;GNAT3;LPO;PIP;RTP1;RTP2;RTP4;TAS2R1;TAS2R10;TAS2R13;TAS2R14;TAS2R16;TAS2R19;TAS2R20;TAS2R3;TAS2R30;TAS2R31;TAS2R38;TAS2R39;TAS2R4;TAS2R40;TAS2R41;TAS2R42;TAS2R43;TAS2R46;TAS2R5;TAS2R50;TAS2R60;TAS2R7;TAS2R8;TAS2R9
GPCR ligand binding_Homo sapiens_R-HSA-500792	Reactome_2016	118	5	5A11_CNV_3;5A4_CNV_2;5A7_CNV_2;7C5_CNV_4;NM4a1_LowPass_3	ACKR2;ACKR3;ACKR4;ADCYAP1;ADCYAP1R1;ADM;ADORA1;ADORA2A;ADORA2B;ADRA1A;ADRA1B;ADRA1D;ADRA2A;ADRA2B;ADRA2C;ADRB1;ADRB2;ADRB3;AGT;AGTR1;AGTR2;ANXA1;APLN;APLNR;AVP;AVPR1A;AVPR1B;AVPR2;BDKRB1;BDKRB2;BRS3;C3;C3AR1;C5;C5AR1;C5AR2;CALCA;CALCR;CALCRL;CASR;CCK;CCKAR;CCKBR;CCL1;CCL11;CCL16;CCL17;CCL19;CCL2;CCL20;CCL21;CCL22;CCL23;CCL25;CCL27;CCL28;CCL3;CCL3L1;CCL4;CCL5;CCL7;CCR1;CCR10;CCR2;CCR3;CCR4;CCR5;CC…
detection of chemical stimulus involved in sensory perception of taste (GO:0050912)	GO_Biological_Process_2018	119	5	10B14_CNV_1;7C5_CNV_4;NM4a1_LowPass_3;NM6b2_LowPass_2;NM6b3_LowPass_2	AZGP1;CST1;CST2;CST4;GNAT3;LPO;PIP;PKD2L1;RTP1;RTP2;RTP4;TAS1R2;TAS2R1;TAS2R10;TAS2R13;TAS2R14;TAS2R16;TAS2R19;TAS2R20;TAS2R3;TAS2R30;TAS2R31;TAS2R38;TAS2R39;TAS2R4;TAS2R40;TAS2R41;TAS2R42;TAS2R43;TAS2R46;TAS2R5;TAS2R50;TAS2R60;TAS2R7;TAS2R8;TAS2R9
nervous system development (GO:0007399)	GO_Biological_Process_2018	120	5	10B14_CNV_1;10B16_CNV_2;10B17_CNV_3;10B9_CNV_3;16B1_CNV_4	ABTB2;ACHE;ADAM22;ADAM23;ADORA1;AHI1;ANKLE2;APAF1;APBA1;APBA2;APLP1;ARHGAP26;ARNT2;ASCL1;ASIC2;ATN1;ATXN10;B3GNT5;BARHL1;BARHL2;BARX1;BARX2;BCAN;BCL11A;BCL11B;BDNF;BPNT1;BTBD1;BTBD11;BTBD2;BTBD3;BTD;CABLES1;CAMK2A;CAMK2G;CDH1;CDH16;CDH2;CDHR4;CDK5;CDK5RAP2;CHAC1;CHD7;CHRM1;CHRM2;CHRM3;CHRNA3;CHST8;CLN5;CLN8;CNTN4;CNTN6;COPS2;CRIM1;CRMP1;CSGALNACT1;CSK;CSPG5;CXCL1;CYP26C1;CYP46A1;DACT1;DAGLA;DAGLB…
cellular response to cytokine stimulus (GO:0071345)	GO_Biological_Process_2018	121	5	10B13_CNV_3;10C5_CNV_1;16B1_CNV_4;5A4_CNV_2;NM3a4_LowPass_2	ADAMTS12;ADAMTS7;AKT1;ALOX15;ALOX5;ANKRD1;ANXA1;AQP4;ARHGEF2;ASPN;BAG4;BATF;BCL2L1;BCL6;BGN;BIRC5;BRCA1;CACTIN;CASP1;CASP3;CBL;CCL1;CCL11;CCL13;CCL14;CCL15;CCL16;CCL17;CCL18;CCL19;CCL2;CCL20;CCL21;CCL22;CCL23;CCL24;CCL25;CCL26;CCL3;CCL3L1;CCL4;CCL4L1;CCL5;CCL7;CCL8;CCND1;CCR1;CCR2;CCR5;CCR7;CD58;CD80;CD86;CDC34;CDK9;CEBPA;CEBPD;CHAD;CHI3L1;CHUK;CIB1;CISH;CLCF1;CNTF;CNTFR;CNTN1;COL1A2;CRHBP;CRK;CR…
peptide cross-linking (GO:0018149)	GO_Biological_Process_2018	123	5	10B11_CNV_1;10B13_CNV_3;10B16_CNV_2;10C6_CNV_1;NM4b4_LowPass_4	ABCA7;ANXA1;COL3A1;CSTA;EVPL;FLG;FN1;IVL;KRT1;KRT10;KRT2;LCE1A;LCE1B;LCE1C;LCE1D;LCE1E;LCE1F;LCE2A;LCE2B;LCE2C;LCE2D;LCE3A;LCE3B;LCE3C;LCE3D;LCE3E;LCE4A;LCE5A;LELP1;LOR;NDNF;PI3;PRR9;SPRR1A;SPRR1B;SPRR2A;SPRR2B;SPRR2D;SPRR2E;SPRR2F;SPRR3;SPRR4;TGM1;TGM3
Chemokine receptors bind chemokines_Homo sapiens_R-HSA-380108	Reactome_2016	137	5	10B18_CNV_3;10B6_CNV_2;16B1_CNV_4;16B3_CNV_4;5A4_CNV_2	ACKR2;ACKR3;ACKR4;CCL1;CCL11;CCL16;CCL17;CCL19;CCL2;CCL20;CCL21;CCL22;CCL25;CCL27;CCL28;CCL3;CCL3L1;CCL4;CCL5;CCL7;CCR1;CCR10;CCR2;CCR3;CCR4;CCR5;CCR6;CCR7;CCR8;CCR9;CCRL2;CX3CL1;CX3CR1;CXCL1;CXCL10;CXCL11;CXCL12;CXCL13;CXCL2;CXCL3;CXCL5;CXCL6;CXCL9;CXCR1;CXCR2;CXCR3;CXCR4;CXCR5;CXCR6;PF4;PPBP;XCL1;XCL2;XCR1
granulocyte chemotaxis (GO:0071621)	GO_Biological_Process_2018	138	5	10B13_CNV_3;16B1_CNV_4;16B3_CNV_4;NM2c1_LowPass_4;NM4b9_LowPass_4	ANXA1;CCL1;CCL11;CCL13;CCL14;CCL15;CCL16;CCL17;CCL18;CCL19;CCL2;CCL20;CCL21;CCL22;CCL23;CCL24;CCL25;CCL26;CCL3;CCL3L1;CCL4;CCL4L1;CCL5;CCL7;CCL8;CX3CL1;CXCL3;CXCL6;CXCR2;EDN2;EDN3;FCER1G;GBF1;ITGB2;NCKAP1L;PDE4B;PIK3CD;PIK3CG;PIP5K1C;S100A12;S100A8;S100A9;SAA1;SCG2;SYK;TGFB2;XCL1;XCL2
neutrophil migration (GO:1990266)	GO_Biological_Process_2018	140	5	10B13_CNV_3;16B1_CNV_4;16B3_CNV_4;NM2c1_LowPass_4;NM4b9_LowPass_4	CCL1;CCL11;CCL13;CCL14;CCL15;CCL16;CCL17;CCL18;CCL19;CCL2;CCL20;CCL21;CCL22;CCL23;CCL24;CCL25;CCL26;CCL3;CCL3L1;CCL4;CCL4L1;CCL5;CCL7;CCL8;CX3CL1;CXCL3;CXCL6;CXCR2;EDN2;EDN3;FCER1G;GBF1;ITGB2;NCKAP1L;PDE4B;PIK3CD;PIK3CG;PIP5K1C;PRTN3;S100A12;S100A8;S100A9;SAA1;SYK;TGFB2;XCL1;XCL2
regulation of nucleic acid-templated transcription (GO:1903506)	GO_Biological_Process_2018	143	5	10B13_CNV_3;16A1_CNV_4;16B3_CNV_4;NM4b10_LowPass_4;NM4b3_LowPass_4	ABCG1;ABL1;ACTN4;ACVR1B;ACVR2B;ACVRL1;AHR;AIRE;AJUBA;ANKRD30A;APBB1;APBB2;ARNT2;ARNTL;ASCC1;ASCL2;ASH2L;ATF2;ATF4;ATF5;ATF7;ATP1B4;BACH1;BAZ1A;BAZ2B;BCL11A;BCL11B;BHLHE40;BMP2;BPTF;BRCA2;BRDT;CALR;CARM1;CDK11A;CELSR2;CHD3;CHD7;CNOT8;CRABP2;CREBBP;CREM;CRX;CTR9;CXXC1;DACH1;DAPK3;DENND4A;DLX4;DMTF1;DNM2;E2F1;EDF1;EFEMP1;ELAVL2;ENG;EP300;ESR2;ESRRA;ESRRB;EZH2;FADS1;FOXC1;FOXP3;FZD7;GATA4;GCFC2;GLRX2…
regulation of cellular macromolecule biosynthetic process (GO:2000112)	GO_Biological_Process_2018	147	5	10B13_CNV_3;16A1_CNV_4;16B3_CNV_4;NM4b10_LowPass_4;NM4b3_LowPass_4	ABCG1;ABL1;ACVR1B;ACVR2B;ACVRL1;AHR;AIRE;AJUBA;ANKRD17;ANKRD30A;APBB1;APBB2;APP;ARNT2;ARNTL;ASCC1;ASCL2;ASH2L;ATF2;ATF4;ATF5;ATF7;ATP1B4;BACH1;BAZ1A;BAZ2B;BCL11A;BCL11B;BHLHE40;BMP2;BPTF;BRCA2;BRDT;CALR;CARM1;CCDC88A;CDC123;CDK11A;CELSR2;CHD3;CHD7;CNOT8;CRABP2;CREBBP;CREM;CRX;CTR9;CXXC1;CYFIP2;DACH1;DAPK3;DDX6;DENND4A;DLX4;DMTF1;DNM2;E2F1;EDF1;EFEMP1;EIF2A;EIF2B4;EIF4E;ELAVL2;ENG;EP300;ESCO1;ESCO…
epidermal cell differentiation (GO:0009913)	GO_Biological_Process_2018	152	5	10B11_CNV_1;10B13_CNV_3;10B16_CNV_2;10C6_CNV_1;NM4b4_LowPass_4	ACER1;ADAM9;AKR1C3;ANXA1;CASP3;CERS3;CLIC4;CSTA;CTNNB1;EPHA2;ERCC2;ERCC3;EREG;EVPL;FLG;GLI1;HDAC1;HDAC2;IVL;JAG1;KRT10;KRT16;LCE1A;LCE1B;LCE1C;LCE1D;LCE1E;LCE1F;LCE2A;LCE2B;LCE2C;LCE2D;LCE3A;LCE3B;LCE3C;LCE3D;LCE3E;LCE4A;LCE5A;LELP1;LOR;MBD4;PIP5K1A;PITX2;PRR9;S100A7;SCEL;SPINK5;SPRR1A;SPRR1B;SPRR2A;SPRR2B;SPRR2D;SPRR2E;SPRR2F;SPRR2G;SPRR3;SPRR4;ST14;TGM1;TGM3;TXNIP;USH2A;WNT16;WNT5A
B cell activation (GO:0042113)	GO_Biological_Process_2018	160	5	10C3_CNV_1;10C5_CNV_1;NM3a4_LowPass_2;NM4b1_LowPass_4;NM6b1_LowPass_2	ADAM17;BANK1;BLNK;CD40LG;CD79A;CEBPG;CHRNA4;CLCF1;CTPS1;FLT3;HDAC4;HDAC9;HHEX;IFNA1;IFNA10;IFNA14;IFNA16;IFNA17;IFNA2;IFNA21;IFNA4;IFNA5;IFNA6;IFNA7;IFNA8;IFNB1;IFNE;IFNK;IFNW1;IL4;JAK3;LEF1;LYL1;MEF2C;MSH2;NFAM1;PLCG2;PTPRC;RAG1;RAG2;VCAM1;ZAP70
lymphocyte differentiation (GO:0030098)	GO_Biological_Process_2018	160	5	10C5_CNV_1;NM3a4_LowPass_2;NM4b1_LowPass_4;NM4b4_LowPass_4;NM6b1_LowPass_2	ADAM17;BLNK;CD3D;CD79A;CEBPG;CHD7;CLCF1;CR2;DLL4;FLT3;HDAC4;HDAC5;HDAC9;HNF1A;IFNA1;IFNA10;IFNA14;IFNA16;IFNA17;IFNA2;IFNA21;IFNA4;IFNA5;IFNA6;IFNA7;IFNA8;IFNB1;IFNE;IFNK;IFNW1;IL10;JAK3;KIT;LYL1;MSH2;NFAM1;PLCG2;PTPN22;PTPRC;RAG1;RAG2;RELB;RHOH;TPD52;TXK;VCAM1;ZAP70
RIG-I/MDA5 mediated induction of IFN-alpha/beta pathways_Homo sapiens_R-HSA-168928	Reactome_2016	166	5	10C3_CNV_1;10C5_CNV_1;NM3a4_LowPass_2;NM4b1_LowPass_4;NM4b4_LowPass_4	AGER;ATG12;DDX58;DHX58;EP300;FADD;HMGB1;IFNA1;IFNA10;IFNA14;IFNA16;IFNA17;IFNA2;IFNA21;IFNA4;IFNA5;IFNA6;IFNA7;IFNA8;IFNB1;IKBKE;IRF1;IRF2;IRF3;MAP3K1;MAVS;NFKB1;NFKB2;NFKBIA;NFKBIB;NLRC5;NLRX1;PCBP2;RELA;RIPK1;RNF135;S100A12;SIKE1;TAX1BP1;TNFAIP3;TRAF6;UBA52;UBA7;UBB;UBE2D3;UBE2K
positive regulation of peptidyl-serine phosphorylation (GO:0033138)	GO_Biological_Process_2018	174	5	10C5_CNV_1;NM2c2_LowPass_4;NM3a4_LowPass_2;NM4b1_LowPass_4;NM4b4_LowPass_4	APP;ARAF;AVP;BRAF;CAMK1;CAPRIN2;CD44;CREBL2;CSF3;DOCK7;EGFR;EIF4G1;HAX1;HCLS1;IFNA1;IFNA10;IFNA14;IFNA16;IFNA17;IFNA2;IFNA21;IFNA4;IFNA5;IFNA6;IFNA7;IFNA8;IFNB1;IFNE;IFNW1;IRGM;LIF;MIF;NTRK3;OSM;PARK7;PDCD10;PFN2;PINK1;PRKD1;PRKD2;RAF1;RPTOR;STOX1;TCL1A;TCL1B
skin development (GO:0043588)	GO_Biological_Process_2018	184	5	10B11_CNV_1;10B13_CNV_3;10B16_CNV_2;10C6_CNV_1;NM4b4_LowPass_4	ABCB6;ACER1;ADAM9;AKR1C3;ALOX12;ALOX12B;ALOXE3;ANXA1;ASCL4;ASPRV1;CASP3;CERS3;CLDN1;CLDN4;CLIC4;COL1A1;COL1A2;COL3A1;COL5A1;COL5A2;COL5A3;CSTA;DACT2;DHCR24;DLL1;EPHA2;EREG;ERRFI1;EVPL;FLG;FLG2;HRNR;ITGA3;ITGA6;ITGB4;IVL;JAG1;KRT10;KRT16;KRT9;LCE1A;LCE1B;LCE1C;LCE1D;LCE1E;LCE1F;LCE2A;LCE2B;LCE2C;LCE2D;LCE3A;LCE3B;LCE3C;LCE3D;LCE3E;LCE4A;LCE5A;LELP1;LOR;MBD4;MET;PIP5K1A;PKD1;PRR9;RPTN;RYR1;S100A7;S…
regulation of gene expression (GO:0010468)	GO_Biological_Process_2018	5	4	10B13_CNV_3;16B3_CNV_4;NM4b10_LowPass_4;NM4b3_LowPass_4	ABCG1;ABL1;ACTG2;ACVR1B;ACVR2B;ACVRL1;ADM2;AES;AFF2;AGGF1;AGR2;AHNAK;AHNAK2;AHR;AIRE;AJUBA;AKAP8L;AKR1B1;AKT1;ALOX12B;ALPK3;AMH;ANK3;ANKRD30A;ANXA7;APBB1;APBB2;APP;ARNT2;ARNTL;ASCC1;ASCL2;ASH2L;ATF2;ATF4;ATF5;ATF7;ATP1B1;ATP1B4;ATRAID;AVP;AVPR2;AZU1;BACH1;BAZ2B;BCL11A;BCL11B;BHLHE40;BMI1;BMP2;BPTF;BRAF;BRCA1;BRCA2;BRDT;C1QTNF1;CALCOCO1;CALCR;CALR;CARM1;CCL3;CCR1;CD28;CD36;CD3E;CDK1;CDK10;CDK11A;C…
hydrolase activity, acting on carbon-nitrogen (but not peptide) bonds, in linear amidines (GO:0016813)	GO_Molecular_Function_2018	11	4	10B10_CNV_2;NM3a7_LowPass_2;NM7a6_LowPass_3;NM7a7_LowPass_3	AGMAT;PADI1;PADI2;PADI3;PADI4
cytokine receptor binding (GO:0005126)	GO_Molecular_Function_2018	28	4	10C3_CNV_1;10C5_CNV_1;NM3a4_LowPass_2;NM6b1_LowPass_2	ADAM17;BMP10;BMP3;BMP5;CCL19;CCL21;CD300LF;CLCF1;FADD;GDF11;GDF7;GDF9;IFNA1;IFNA10;IFNA14;IFNA16;IFNA17;IFNA2;IFNA21;IFNA4;IFNA5;IFNA6;IFNA7;IFNA8;IFNB1;IFNE;IFNK;IFNL1;IFNW1;IL13;IL1A;IL1B;IL1F10;IL1RN;IL23A;IL25;IL3;IL36A;IL36B;IL36G;IL36RN;IL37;IL4;IL5;INHBB;INHBC;INHBE;JAK2;LIF;LIFR;OSM;PXDN;SMAD3;SPRED1;SPRED2;TGFB1;TGFBR3;TGFBRAP1;TIMM50;TLR9;TNFSF11;TSLP;USP15
Measles	KEGG_2019_Human	28	4	10C3_CNV_1;NM2c2_LowPass_4;NM3a4_LowPass_2;NM4b1_LowPass_4	AKT2;BAX;BBC3;BID;CASP3;CBLB;CCND1;CCNE1;CD3D;CD3E;CD3G;CDK2;CDK4;CSNK2A1;CSNK2A2;CSNK2A3;CSNK2B;CYCS;DDX58;FADD;FAS;GSK3B;HSPA1A;HSPA1B;HSPA1L;IFNA1;IFNA10;IFNA13;IFNA14;IFNA16;IFNA17;IFNA2;IFNA21;IFNA4;IFNA5;IFNA6;IFNA7;IFNA8;IFNAR1;IFNAR2;IFNB1;IL12A;IL2RB;IL2RG;IRF3;JAK3;MAP3K7;MAVS;MSN;MX1;NFKBIB;PIK3CA;PIK3CB;PIK3CD;PIK3R1;PIK3R2;PIK3R3;RELA;STAT2;TLR9;TNFAIP3;TRAF6
Hepatitis C	KEGG_2019_Human	37	4	10C3_CNV_1;NM2c2_LowPass_4;NM3a4_LowPass_2;NM4b1_LowPass_4	AKT2;BAX;BID;BRAF;CASP3;CCND1;CDK2;CDK4;CLDN1;CLDN11;CLDN14;CLDN16;CLDN17;CLDN18;CLDN19;CLDN25;CLDN5;CLDN8;CYCS;DDX58;EIF3E;FADD;FAS;GRB2;GSK3B;IFIT1;IFIT1B;IFNA1;IFNA10;IFNA13;IFNA14;IFNA16;IFNA17;IFNA2;IFNA21;IFNA4;IFNA5;IFNA6;IFNA7;IFNA8;IFNAR1;IFNAR2;IFNB1;IRF3;KRAS;MAPK1;MAPK3;MAVS;MX1;NRAS;OCLN;PIK3CA;PIK3CB;PIK3CD;PIK3R1;PIK3R2;PIK3R3;PPP2CA;PPP2CB;PPP2R1B;PPP2R2A;PPP2R2C;PPP2R2D;RAF1;RB1;…
keratin filament (GO:0045095)	GO_Cellular_Component_2018	40	4	10C1_CNV_1;10C3_CNV_1;10C5_CNV_1;NM4b9_LowPass_4	FBF1;GPER1;KRT18;KRT3;KRT4;KRT5;KRT71;KRT82;KRT84;TCHP
positive regulation of hydrolase activity (GO:0051345)	GO_Biological_Process_2018	49	4	10B13_CNV_3;16A1_CNV_4;16B3_CNV_4;NM4b9_LowPass_4	ABR;ALDOB;ALS2;APOA1;ARAP1;ARHGAP21;ARHGAP23;ARHGAP27;ARHGEF38;ARHGEF7;ATP1B1;ATP1B2;ATP1B3;BCAS3;BMP2;CALM1;CALM2;CALM3;CAV2;CCL1;CCL11;CCL13;CCL14;CCL15;CCL16;CCL17;CCL18;CCL19;CCL2;CCL20;CCL21;CCL22;CCL23;CCL24;CCL25;CCL26;CCL3;CCL3L1;CCL4;CCL4L1;CCL5;CCL7;CCL8;CHTOP;CTSH;CX3CL1;DNAJB1;DNAJB2;DNAJC10;DNAJC24;DNMBP;DOCK10;DOCK11;DOCK8;DOCK9;DVL3;ECT2;ERBB2;EVI5;EVI5L;EZH2;F11R;F2R;F2RL1;FGF10;F…
cellular response to copper ion (GO:0071280)	GO_Biological_Process_2018	72	4	10C1_CNV_1;10C5_CNV_1;NM2c2_LowPass_4;NM3a6_LowPass_2	AOC1;MT1A;MT1B;MT1E;MT1F;MT1G;MT1H;MT1M;MT1X;MT2A;MT3;MT4;PRNP
chemokine receptor activity (GO:0004950)	GO_Molecular_Function_2018	72	4	10B6_CNV_2;16B3_CNV_4;5A3_CNV_2;5A4_CNV_2	ACKR2;ACKR3;ACKR4;CCR1;CCR2;CCR3;CCR4;CCR5;CCR6;CCR7;CCR8;CCR9;CMKLR1;CX3CR1;CXCR1;CXCR2;CXCR3;CXCR4;GPR17;GPR35;GPR75
Human cytomegalovirus infection	KEGG_2019_Human	73	4	10B18_CNV_3;10C3_CNV_1;NM3a4_LowPass_2;NM6b1_LowPass_2	ADCY2;ADCY3;ADCY4;ADCY5;ADCY6;ADCY8;AKAP13;AKT2;ARHGEF1;ARHGEF12;ATF4;ATF6B;B2M;BAK1;BID;CALM2;CALM3;CALML4;CALR;CASP9;CCL2;CCL3;CCL3L1;CCL3L3;CCL4;CCL4L1;CCL4L2;CCL5;CCND1;CCR1;CCR3;CCR5;CDK4;CDKN1A;CDKN2A;CREB1;CREB3;CREB3L2;CREB5;CRKL;CTNNB1;CXCR4;CYCS;E2F2;E2F3;EGFR;FADD;FAS;GNAI2;GNAQ;GNB3;GNB4;GNB5;GNG10;GNG5;GNG8;GNGT2;GRB2;GSK3B;HLA-A;HLA-B;HLA-C;HLA-E;HLA-F;HLA-G;IFNA1;IFNA10;IFNA13;IFNA…
response to copper ion (GO:0046688)	GO_Biological_Process_2018	86	4	10C1_CNV_1;10C5_CNV_1;NM2c2_LowPass_4;NM3a6_LowPass_2	AOC1;ATP5D;ATP7B;IL1A;MT1A;MT1B;MT1E;MT1F;MT1G;MT1H;MT1M;MT1X;MT2A;MT3;MT4;PRNP
Linoleic acid metabolism	KEGG_2019_Human	90	4	10B10_CNV_2;10C5_CNV_1;NM3a2_LowPass_2;NM6b1_LowPass_2	CYP1A2;CYP2C19;CYP2C8;CYP2C9;JMJD7-PLA2G4B;PLA2G12A;PLA2G2A;PLA2G2C;PLA2G2D;PLA2G2E;PLA2G2F;PLA2G3;PLA2G4A;PLA2G4B;PLA2G4C;PLA2G4D;PLA2G4E;PLA2G4F;PLA2G5;PLB1
cellular response to cadmium ion (GO:0071276)	GO_Biological_Process_2018	92	4	10C1_CNV_1;10C5_CNV_1;NM2c2_LowPass_4;NM3a6_LowPass_2	AKR1C3;JUN;MAPK1;MAPK3;MAPK9;MT1A;MT1B;MT1E;MT1F;MT1G;MT1H;MT1M;MT1X;MT2A;MT3;MT4
RNA Polymerase I Promoter Opening_Homo sapiens_R-HSA-73728	Reactome_2016	92	4	10B18_CNV_3;10C3_CNV_1;16B3_CNV_4;5A7_CNV_2	H2AFX;H2AFZ;H3F3A;HIST1H2AB;HIST1H2AC;HIST1H2AD;HIST1H2AJ;HIST1H2BA;HIST1H2BB;HIST1H2BC;HIST1H2BD;HIST1H2BH;HIST1H2BK;HIST1H2BL;HIST1H2BM;HIST1H2BN;HIST1H2BO;HIST1H3A;HIST1H4A;HIST2H2AA3;HIST2H2AC;HIST2H2BE;HIST2H3A;HIST3H2BB;MAPK3;MBD2;UBTF
Packaging Of Telomere Ends_Homo sapiens_R-HSA-171306	Reactome_2016	93	4	10B18_CNV_3;10C3_CNV_1;16B3_CNV_4;5A7_CNV_2	ACD;H2AFX;H2AFZ;HIST1H2AB;HIST1H2AC;HIST1H2AD;HIST1H2AJ;HIST1H2BA;HIST1H2BB;HIST1H2BC;HIST1H2BD;HIST1H2BH;HIST1H2BK;HIST1H2BL;HIST1H2BM;HIST1H2BN;HIST1H2BO;HIST1H4A;HIST2H2AA3;HIST2H2AC;HIST2H2BE;HIST3H2BB;HIST3H3;POT1;TERF1;TERF2;TERF2IP
response to cadmium ion (GO:0046686)	GO_Biological_Process_2018	95	4	10C1_CNV_1;10C5_CNV_1;NM2c2_LowPass_4;NM3a6_LowPass_2	AKR1C3;JUN;MAPK1;MAPK3;MAPK9;MT1A;MT1B;MT1E;MT1F;MT1G;MT1H;MT1M;MT1X;MT2A;MT3;MT4;SLC34A1
DNA methylation_Homo sapiens_R-HSA-5334118	Reactome_2016	95	4	10B18_CNV_3;10C3_CNV_1;16B3_CNV_4;5A7_CNV_2	DNMT3A;DNMT3B;DNMT3L;H2AFX;H2AFZ;H3F3A;HIST1H2AB;HIST1H2AC;HIST1H2AD;HIST1H2AJ;HIST1H2BA;HIST1H2BB;HIST1H2BC;HIST1H2BD;HIST1H2BH;HIST1H2BK;HIST1H2BL;HIST1H2BM;HIST1H2BN;HIST1H2BO;HIST1H3A;HIST1H4A;HIST2H2AA3;HIST2H2AC;HIST2H2BE;HIST2H3A;HIST3H2BB
response to zinc ion (GO:0010043)	GO_Biological_Process_2018	98	4	10C1_CNV_1;10C5_CNV_1;10C6_CNV_1;NM3a6_LowPass_2	ATP13A2;D2HGDH;GLRA1;HAAO;HVCN1;MT1A;MT1B;MT1E;MT1F;MT1G;MT1H;MT1HL1;MT1M;MT1X;MT2A;MT3;MT4;SLC30A1;SLC30A10;SLC30A2;SLC30A4;SLC30A5;SLC30A6;SLC30A7;SLC30A8;ZACN;ZNF658
PI3K-Akt signaling pathway	KEGG_2019_Human	103	4	10C3_CNV_1;NM3a4_LowPass_2;NM4b1_LowPass_4;NM4b4_LowPass_4	AKT2;AKT3;ANGPT1;ANGPT4;ATF4;ATF6B;BRCA1;C8ORF44-SGK3;CCND1;CCNE1;CDK2;CDK4;CDKN1B;CHAD;CHRM2;COL1A1;COL4A1;COL4A2;COL4A3;COL4A4;COL6A3;COL9A1;COL9A2;COL9A3;COMP;CREB3;CREB3L2;CREB3L4;CREB5;CRTC2;CSF1R;CSF3;DDIT4;EFNA5;EGFR;EIF4B;EIF4E2;EPOR;ERBB2;ERBB3;FGF10;FGF17;FGF18;FGF19;FGF21;FGF3;FGF4;FGF9;FGFR2;FGFR3;FLT1;FLT3;FLT3LG;G6PC;G6PC3;GHR;GNG10;GNG2;GNG4;GNG5;GNG8;GNGT2;GRB2;GYS1;GYS2;IFNA1;IFN…
PRC2 methylates histones and DNA_Homo sapiens_R-HSA-212300	Reactome_2016	110	4	10B18_CNV_3;10C3_CNV_1;16B3_CNV_4;5A7_CNV_2	AEBP2;DNMT3A;DNMT3B;EED;EZH2;H2AFX;H2AFZ;H3F3A;HIST1H2AB;HIST1H2AC;HIST1H2AD;HIST1H2AJ;HIST1H2BA;HIST1H2BB;HIST1H2BC;HIST1H2BD;HIST1H2BH;HIST1H2BK;HIST1H2BL;HIST1H2BM;HIST1H2BN;HIST1H2BO;HIST1H3A;HIST1H4A;HIST2H2AA3;HIST2H2AC;HIST2H2BE;HIST2H3A;HIST3H2BB;JARID2;PHF1;PHF19;RBBP7;SUZ12
ribonuclease activity (GO:0004540)	GO_Molecular_Function_2018	128	4	16A1_CNV_4;NM6b1_LowPass_2;NM7a6_LowPass_3;NM7a7_LowPass_3	ANG;AZGP1;CNOT6;CNOT7;CPSF3;CPSF4;DICER1;DIS3L2;ELAC2;ERN1;PIWIL2;POP4;PPP1R8;RNASE1;RNASE10;RNASE11;RNASE12;RNASE13;RNASE2;RNASE3;RNASE4;RNASE6;RNASE7;RNASE8;RNASE9;RNASEH1;RNASEK;RNASEL;SLFN14;SMG6;SMG7;TSN
DNA Damage/Telomere Stress Induced Senescence_Homo sapiens_R-HSA-2559586	Reactome_2016	140	4	10B18_CNV_3;10C3_CNV_1;5A3_CNV_2;5A7_CNV_2	ACD;ATM;CABIN1;CCNA1;CCNA2;CCNE1;CCNE2;CDK2;CDKN1A;CDKN1B;EP400;H1F0;H2AFB1;H2AFX;H2AFZ;HIRA;HIST1H1A;HIST1H1B;HIST1H1C;HIST1H1D;HIST1H1E;HIST1H2AB;HIST1H2AC;HIST1H2AD;HIST1H2AJ;HIST1H2BA;HIST1H2BB;HIST1H2BC;HIST1H2BD;HIST1H2BH;HIST1H2BK;HIST1H2BL;HIST1H2BM;HIST1H2BN;HIST1H2BO;HIST1H4A;HIST2H2AA3;HIST2H2AC;HIST2H2BE;HIST3H2BB;HIST3H3;HMGA1;LMNB1;NBN;POT1;RAD50;RB1;TERF1;TERF2;TERF2IP;TP53;UBN1
Amyloid fiber formation_Homo sapiens_R-HSA-977225	Reactome_2016	152	4	10B18_CNV_3;10C3_CNV_1;5A12_CNV_3;5A7_CNV_2	APCS;APOA1;APOA4;APP;B2M;BACE1;CALCA;CST3;FGA;FURIN;GGA1;GGA2;GGA3;GSN;H2AFX;H2AFZ;H3F3A;HIST1H2AB;HIST1H2AC;HIST1H2AD;HIST1H2AJ;HIST1H2BA;HIST1H2BB;HIST1H2BC;HIST1H2BD;HIST1H2BH;HIST1H2BK;HIST1H2BL;HIST1H2BM;HIST1H2BN;HIST1H2BO;HIST1H3A;HIST1H4A;HIST2H2AA3;HIST2H2AC;HIST2H2BE;HIST2H3A;HIST3H2BB;IAPP;INS;ITM2B;LTF;LYZ;MFGE8;NAT8;NPPA;ODAM;PARK2;PRL;RPS27A;SAA1;SIAH1;SIAH2;SNCA;SNCAIP;TGFBI;TTR;UB…
response to interferon-gamma (GO:0034341)	GO_Biological_Process_2018	153	4	16B1_CNV_4;16B3_CNV_4;NM2c1_LowPass_4;NM4b9_LowPass_4	AQP4;CASP1;CCL1;CCL11;CCL13;CCL14;CCL15;CCL16;CCL17;CCL18;CCL2;CCL20;CCL22;CCL23;CCL24;CCL25;CCL26;CCL3;CCL3L1;CCL4;CCL4L1;CCL5;CCL7;CCL8;CD58;CIITA;CX3CL1;DAPK1;DAPK3;EPRS;GBP6;IFITM1;IFITM2;IFITM3;IL23R;KYNU;MEFV;NUB1;PDE12;RPL13A;SLC11A1;SLC26A6;SP100;STAT1;TDGF1;TRIM21;WNT5A;XCL1;XCL2
regulation of innate immune response (GO:0045088)	GO_Biological_Process_2018	155	4	10C3_CNV_1;10C5_CNV_1;NM3a4_LowPass_2;NM6b1_LowPass_2	ADAM8;EREG;FGR;GBP5;GFI1;HLA-E;IFNA1;IFNA10;IFNA14;IFNA16;IFNA17;IFNA2;IFNA21;IFNA4;IFNA5;IFNA6;IFNA7;IFNA8;IFNB1;IFNK;IRF1;MUL1;OTUD7A;PARP9;POLR3D;POLR3G;STAT2;TNFAIP3;TYRO3;XIAP
intermediate filament cytoskeleton (GO:0045111)	GO_Cellular_Component_2018	157	4	10C3_CNV_1;10C5_CNV_1;NM4b4_LowPass_4;NM4b9_LowPass_4	ADCY5;BCAS3;CLIP1;DCTN1;DDX60;DISC1;EVPL;FLG;INA;KRT10;KRT13;KRT14;KRT16;KRT17;KRT18;KRT2;KRT20;KRT3;KRT4;KRT5;KRT6A;KRT7;KRT75;KRT76;KRT8;KRT80;MDN1;MMP14;NEFM;NOL9;NR1I2;NSFL1C;PJA2;PKN2;PNN;PRPH;S100A8;SAP30BP;SMARCA2;SYNE2;TLK2;ZNF131
endonuclease activity (GO:0004519)	GO_Molecular_Function_2018	160	4	16A1_CNV_4;NM6b1_LowPass_2;NM7a6_LowPass_3;NM7a7_LowPass_3	ANG;APEX1;APLF;CPSF3;CPSF4;DICER1;DIS3;DNASE1;EME1;ERN1;GEN1;LRPPRC;PIWIL2;PNKP;RAD51;RAD51B;RAD51C;RAD51D;RNASE1;RNASE10;RNASE11;RNASE12;RNASE13;RNASE2;RNASE3;RNASE4;RNASE6;RNASE7;RNASE8;RNASE9;RNASEK;RNASEL;SETMAR;SLFN14;SLX4;SMG6;TSN;XRCC2;ZRANB3
response to interleukin-1 (GO:0070555)	GO_Biological_Process_2018	163	4	16B1_CNV_4;16B3_CNV_4;NM2c1_LowPass_4;NM4b9_LowPass_4	AES;CACTIN;CCL1;CCL11;CCL13;CCL14;CCL15;CCL16;CCL17;CCL18;CCL2;CCL20;CCL22;CCL23;CCL24;CCL25;CCL26;CCL3;CCL3L1;CCL4;CCL4L1;CCL5;CCL7;CCL8;CHI3L1;CX3CL1;HDAC4;HYAL1;HYAL2;HYAL3;IL1R1;MAPK11;MYD88;NLRP7;PTGIS;RC3H1;RELA;SELE;TAF9;TANK;TRAF6;XCL1;XCL2;YTHDC2
Taste transduction	KEGG_2019_Human	173	4	10B14_CNV_1;7C5_CNV_4;NM4a1_LowPass_3;NM6b2_LowPass_2	ADCY6;ADCY8;ASIC2;CACNA1A;CACNA1C;CALHM1;ENTPD2;GABBR2;GABRA1;GABRA5;GABRA6;GNAT3;GNB3;GNG13;GRM1;HTR1A;HTR1D;HTR1F;HTR3A;HTR3B;HTR3C;HTR3D;HTR3E;P2RX3;P2RY1;PDE1A;PDE1C;PKD2L1;PLCB2;PRKACA;SCN2A;SCN3A;SCN9A;SCNN1A;TAS1R2;TAS2R1;TAS2R10;TAS2R13;TAS2R14;TAS2R16;TAS2R19;TAS2R20;TAS2R3;TAS2R30;TAS2R31;TAS2R38;TAS2R39;TAS2R4;TAS2R40;TAS2R41;TAS2R42;TAS2R43;TAS2R46;TAS2R5;TAS2R50;TAS2R60;TAS2R7;TAS2R8…
response to tumor necrosis factor (GO:0034612)	GO_Biological_Process_2018	186	4	16B3_CNV_4;7C5_CNV_4;NM2c1_LowPass_4;NM4b9_LowPass_4	ADAM9;ADAMTS12;ADIPOQ;AFF3;ARHGEF2;BAG4;BRCA1;CACTIN;CASP8;CCL1;CCL11;CCL13;CCL14;CCL15;CCL16;CCL17;CCL18;CCL2;CCL20;CCL22;CCL23;CCL24;CCL25;CCL26;CCL3;CCL3L1;CCL4;CCL4L1;CCL5;CCL7;CCL8;CD58;CRHBP;CX3CL1;CXCL16;DCSTAMP;GATA3;GCH1;GPER1;HAS2;HMHB1;HYAL1;HYAL2;HYAL3;IKBKB;MAP2K7;MAP4K3;NFE2L2;NUB1;OCSTAMP;PID1;RELA;RPS3;SELE;SFRP1;SMPD4;TANK;TDGF1;XCL1;XCL2;YBX3;YTHDC2;ZFP36L1;ZFP36L2
Dectin-2 family_Homo sapiens_R-HSA-5621480	Reactome_2016	1	3	NM4a1_LowPass_3;NM4a5_LowPass_3;NM6b3_LowPass_2	CLEC4A;CLEC4C;CLEC4D;CLEC4E;CLEC6A;FCER1G;FYN;LYN
cellular response to interferon-gamma (GO:0071346)	GO_Biological_Process_2018	17	3	16B1_CNV_4;NM2c1_LowPass_4;NM4b9_LowPass_4	AQP4;CAMK2B;CAMK2G;CASP1;CCL1;CCL11;CCL13;CCL14;CCL15;CCL16;CCL18;CCL2;CCL20;CCL23;CCL24;CCL25;CCL26;CCL3;CCL3L1;CCL4;CCL4L1;CCL5;CCL7;CCL8;CD44;CD58;DAPK1;DAPK3;EPRS;GBP1;GBP2;GBP6;ICAM1;IFNGR2;IRF1;IRF2;IRF6;IRF7;MID1;NCAM1;OAS1;OAS2;OAS3;PDE12;PML;PRKCD;SLC26A6;SP100;TDGF1;TRIM21;TRIM22;TRIM34;TRIM68;WNT5A
Natural killer cell mediated cytotoxicity	KEGG_2019_Human	22	3	10C3_CNV_1;NM3a4_LowPass_2;NM4b1_LowPass_4	BRAF;CASP3;CSF2;FAS;FYN;GRB2;HCST;HLA-A;HLA-B;HLA-C;HLA-E;HLA-G;IFNA1;IFNA10;IFNA13;IFNA14;IFNA16;IFNA17;IFNA2;IFNA21;IFNA4;IFNA5;IFNA6;IFNA7;IFNA8;IFNAR1;IFNAR2;IFNB1;IFNGR1;IFNGR2;KRAS;LCP2;MICA;MICB;NCR3;NRAS;PIK3R1;PIK3R2;PIK3R3;PLCG2;PPP3CC;PPP3R2;PTK2B;RAC2;RAC3;SH2D1A;SH3BP2;TNF;TNFRSF10A;TNFRSF10B;TYROBP
Factors involved in megakaryocyte development and platelet production_Homo sapiens_R-HSA-983231	Reactome_2016	30	3	10C3_CNV_1;NM3a3_LowPass_2;NM3a4_LowPass_2	AK3;AKAP10;CABLES1;CAPZA2;CAPZB;CBX5;CDC42;CDK2;CDK5;DOCK1;DOCK3;DOCK4;DOCK5;DOCK6;DOCK8;DOCK9;EHD1;EHD3;GATA4;GATA6;H3F3A;HBB;HBD;HBE1;HBG1;HBG2;HDAC1;HDAC2;HIST1H3A;HMG20B;IFNA1;IFNA10;IFNA14;IFNA16;IFNA17;IFNA2;IFNA21;IFNA4;IFNA5;IFNA6;IFNA7;IFNA8;IFNB1;IRF1;IRF7;ITPK1;JAK2;KDM1A;KIF11;KIF12;KIF13B;KIF18A;KIF18B;KIF19;KIF1A;KIF20B;KIF26A;KIF27;KIF2C;KIF3A;KIF5A;KIF9;KLC1;KLC2;LRRC16A;MAFG;MYB;…
regulation of transcription, DNA-templated (GO:0006355)	GO_Biological_Process_2018	39	3	10B13_CNV_3;NM4b1_LowPass_4;NM4b10_LowPass_4	AATF;ABCG1;ACTL6A;ACVR1;ADIPOQ;AES;AFAP1L2;AHR;AIRE;AJUBA;AKT1;ALX1;ANKRA2;ANKRD30A;APBB2;APOE;ARHGAP35;ARHGEF11;ARID1A;ARID5A;ARID5B;ARNT;ARNT2;ARNTL2;ASCC1;ASH2L;ATF2;ATF4;ATF5;ATF6;ATF7IP;ATMIN;ATOH8;ATP1B4;ATP8B1;ATXN1;AXIN1;BACH1;BAMBI;BARHL2;BARX1;BATF;BAZ2B;BCL10;BCL11A;BCL11B;BCL3;BCL6;BCOR;BEND5;BHLHE40;BHLHE41;BIRC5;BLM;BMP10;BMP2;BMP7;BPTF;BRCA1;BRCA2;BRD4;BRDT;BRF2;BRIP1;BRWD1;BTBD8;B…
G-protein coupled chemoattractant receptor activity (GO:0001637)	GO_Molecular_Function_2018	40	3	10B6_CNV_2;5A3_CNV_2;5A4_CNV_2	ACKR2;ACKR4;CCR1;CCR2;CCR3;CCR4;CCR5;CCR6;CCR8;CCR9;CMKLR1;CX3CR1;CXCR1;CXCR3;GPR17
Influenza A	KEGG_2019_Human	48	3	10C3_CNV_1;10C5_CNV_1;NM3a4_LowPass_2	ACTG1;AGFG1;CASP1;CXCL10;CYCS;DDX39B;DDX58;EIF2AK3;EIF2S1;EP300;FAS;GSK3B;HLA-DQA1;HLA-DQB1;HLA-DRA;HLA-DRB1;HLA-DRB5;HSPA1A;HSPA1B;HSPA1L;HSPA2;IFNA1;IFNA10;IFNA13;IFNA14;IFNA16;IFNA17;IFNA2;IFNA21;IFNA4;IFNA5;IFNA6;IFNA7;IFNA8;IFNB1;IFNGR1;IL18;IL1A;IL1B;IL33;IVNS1ABP;JAK2;JUN;KPNA1;KPNA2;MAP2K6;MAPK9;NFKB1;NLRX1;PRSS1;PRSS3;RELA;SOCS3;STAT2;TMPRSS13;TMPRSS4;TNF;TNFRSF10A;TNFRSF10B;VDAC1
MHC protein complex (GO:0042611)	GO_Cellular_Component_2018	58	3	10B18_CNV_3;10C3_CNV_1;5A3_CNV_2	CD74;HLA-A;HLA-B;HLA-C;HLA-DMA;HLA-DMB;HLA-DOA;HLA-DOB;HLA-DPA1;HLA-DPB1;HLA-DQA1;HLA-DQB1;HLA-DQB2;HLA-DRA;HLA-DRB1;HLA-DRB5;HLA-E
positive regulation of GTPase activity (GO:0043547)	GO_Biological_Process_2018	61	3	10B13_CNV_3;NM2c1_LowPass_4;NM4b9_LowPass_4	ABR;ADPRHL1;ALS2;ARHGAP21;ARHGAP23;ARHGAP27;ARHGEF10;ARHGEF38;ARHGEF7;BCAS3;CCDC125;CCL1;CCL11;CCL13;CCL14;CCL15;CCL16;CCL17;CCL18;CCL19;CCL2;CCL20;CCL21;CCL22;CCL23;CCL24;CCL25;CCL26;CCL3;CCL3L1;CCL4;CCL4L1;CCL5;CCL7;CCL8;CCR7;CORO1C;CX3CL1;DNMBP;DOCK10;DOCK11;DOCK7;DOCK8;DOCK9;DVL3;ECT2;ERBB2;EVI5;EVI5L;F11R;F2R;F2RL1;FOXJ1;FZD10;GNB5;GPR65;GRTP1;HRAS;ITGA6;ITGB1;LIMS1;NDEL1;NET1;NF1;NTRK1;PIN1…
cellular response to tumor necrosis factor (GO:0071356)	GO_Biological_Process_2018	62	3	10B13_CNV_3;NM2c1_LowPass_4;NM4b9_LowPass_4	ADAM17;ADAMTS7;AIM2;AKT1;ARHGEF2;BAG4;BRCA1;CACTIN;CARD14;CCL1;CCL11;CCL13;CCL14;CCL15;CCL16;CCL17;CCL18;CCL19;CCL2;CCL20;CCL21;CCL22;CCL23;CCL24;CCL25;CCL26;CCL3;CCL3L1;CCL4;CCL4L1;CCL5;CCL7;CCL8;CD40LG;CD58;CD70;CDIP1;CHUK;CIB1;COMMD7;CRHBP;CX3CL1;DAB2IP;EDA2R;EDAR;GATA3;GBA;GPER1;IKBKB;INPP5K;LIMS1;NFE2L2;NGFR;NKX3-1;NPNT;PID1;PLVAP;PSMA2;PSMA4;PSMA5;PSMA7;PSMA8;PSMB1;PSMB2;PSMB3;PSMB4;PSMB6;P…
Xenobiotics_Homo sapiens_R-HSA-211981	Reactome_2016	65	3	16B3_CNV_4;NM3a1_LowPass_2;NM4b10_LowPass_4	CYP1A1;CYP1A2;CYP2A13;CYP2A6;CYP2A7;CYP2B6;CYP2F1;CYP2S1;CYP3A4;CYP3A43;CYP3A5;CYP3A7
Viral carcinogenesis	KEGG_2019_Human	66	3	10B18_CNV_3;10C3_CNV_1;5A3_CNV_2	ACTN1;ACTN4;ATF2;ATF4;ATF6B;ATP6V0D1;ATP6V0D2;BAK1;CASP3;CASP8;CCNA2;CCND1;CCND2;CCND3;CCNE1;CCNE2;CCR3;CCR4;CCR5;CCR8;CDK2;CDK4;CDKN1A;CDKN1B;CDKN2A;CDKN2B;CHD4;CREB1;CREB3;CREB3L2;CREB5;DLG1;EGR3;EP300;GRB2;GSN;GTF2A1;GTF2E1;GTF2E2;GTF2H1;GTF2H4;H2BFM;H2BFWT;HDAC10;HDAC11;HDAC3;HDAC4;HDAC5;HDAC7;HDAC8;HIST1H2BA;HIST1H2BB;HIST1H2BC;HIST1H2BD;HIST1H2BE;HIST1H2BF;HIST1H2BG;HIST1H2BH;HIST1H2BI;HIST…
G alpha (i) signalling events_Homo sapiens_R-HSA-418594	Reactome_2016	78	3	7C5_CNV_4;NM4a1_LowPass_3;NM6b3_LowPass_2	ACKR3;ADCY5;ADCY8;ADRA2A;ADRA2B;ADRA2C;APLNR;C3;C3AR1;CASR;CCL16;CCL20;CCL23;CCL25;CCL28;CCL5;CCR10;CCR4;CCR7;CHRM2;CHRM4;CNR1;CXCL1;CXCL10;CXCL11;CXCL13;CXCL16;CXCL2;CXCL3;CXCL5;CXCL6;CXCL9;CXCR1;CXCR2;CXCR4;DRD3;FPR1;FPR2;FPR3;GAL;GALR2;GNAZ;GNB3;GNB4;GNG10;GNG13;GNG2;GNG3;GNG7;GNGT2;GPR55;GRM8;HEBP1;HRH3;HRH4;HTR1A;HTR1F;HTR5A;KNG1;LPAR1;LPAR5;MCHR2;NMS;NMU;NMUR1;NMUR2;NPB;NPBWR1;NPBWR2;NPW;NP…
alpha-Linolenic acid metabolism	KEGG_2019_Human	82	3	10C5_CNV_1;NM3a2_LowPass_2;NM6b1_LowPass_2	JMJD7-PLA2G4B;PLA2G12A;PLA2G2A;PLA2G2C;PLA2G2D;PLA2G2E;PLA2G2F;PLA2G3;PLA2G4A;PLA2G4B;PLA2G4C;PLA2G4D;PLA2G4E;PLA2G4F;PLA2G5;PLB1
integral component of lumenal side of endoplasmic reticulum membrane (GO:0071556)	GO_Cellular_Component_2018	92	3	10B18_CNV_3;10C3_CNV_1;5A3_CNV_2	BCAP31;CALR;CANX;CD74;HFE;HLA-A;HLA-B;HLA-C;HLA-DPA1;HLA-DPB1;HLA-DQA1;HLA-DQA2;HLA-DQB1;HLA-DQB2;HLA-DRA;HLA-DRB1;HLA-DRB5;HLA-E;HLA-F;HLA-G;PKD2;SPPL2A;SPPL2C;TAPBP
regulation of leukocyte chemotaxis (GO:0002688)	GO_Biological_Process_2018	93	3	16B3b_CNV_4;NM6b1_LowPass_2;NM6b3_LowPass_2	ADAM17;CXCL1;CXCL10;CXCL11;CXCL13;CXCL2;CXCL3;CXCL5;CXCL6;CXCL9;IL6;LYN;MTUS1;PF4;PF4V1;PPBP;PTK2B;SLC8B1;SLIT2
zinc ion homeostasis (GO:0055069)	GO_Biological_Process_2018	95	3	10C1_CNV_1;10C5_CNV_1;NM3a6_LowPass_2	ATP13A2;MT1A;MT1B;MT1E;MT1F;MT1G;MT1H;MT1M;MT1X;MT2A;MT3;MT4;SLC30A5;SLC30A8;SLC39A5;SLC39A8;TMC8
Human papillomavirus infection	KEGG_2019_Human	99	3	10B18_CNV_3;10C3_CNV_1;NM3a4_LowPass_2	APC;ATM;ATP6V0A1;ATP6V0A4;ATP6V0D1;ATP6V0E2;ATP6V1A;ATP6V1C1;ATP6V1D;ATP6V1E1;ATP6V1G1;ATP6V1G2;ATP6V1G3;ATR;BAK1;CCND1;CCND2;CCND3;CDK2;CDK4;CDKN1A;CHAD;CHD4;COL1A1;COL1A2;COL2A1;COL4A1;COL4A2;COL4A3;COL4A4;COL6A3;COL6A5;COL6A6;COL9A1;COMP;CREB1;CREB3;CREB3L2;CREB5;CSNK1A1;CSNK1A1L;CTNNB1;DLG1;DVL3;EP300;FADD;FAS;FOXO1;FZD2;FZD3;FZD5;FZD6;FZD7;GRB2;GSK3B;HES1;HES6;HLA-A;HLA-B;HLA-C;HLA-E;HLA-F;H…
Allograft rejection	KEGG_2019_Human	107	3	10B18_CNV_3;10C3_CNV_1;5A3_CNV_2	CD28;CD40LG;CD80;CD86;FAS;HLA-A;HLA-B;HLA-C;HLA-DMA;HLA-DMB;HLA-DOA;HLA-DOB;HLA-DPA1;HLA-DPB1;HLA-DQA1;HLA-DQA2;HLA-DQB1;HLA-DRA;HLA-DRB1;HLA-DRB5;HLA-E;HLA-F;HLA-G;IL12A;IL12B;IL2;IL4;IL5;TNF
Graft-versus-host disease	KEGG_2019_Human	111	3	10B18_CNV_3;10C3_CNV_1;5A3_CNV_2	CD28;CD80;CD86;FAS;HLA-A;HLA-B;HLA-C;HLA-DMA;HLA-DMB;HLA-DOA;HLA-DOB;HLA-DPA1;HLA-DPB1;HLA-DQA1;HLA-DQA2;HLA-DQB1;HLA-DRA;HLA-DRB1;HLA-DRB5;HLA-E;HLA-F;HLA-G;IL1A;IL1B;IL2;IL6;KLRC1;KLRD1;TNF
Condensation of Prophase Chromosomes_Homo sapiens_R-HSA-2299718	Reactome_2016	111	3	10B18_CNV_3;10C3_CNV_1;5A7_CNV_2	CDK1;H2AFX;H2AFZ;H3F3A;HIST1H2AB;HIST1H2AC;HIST1H2AD;HIST1H2AJ;HIST1H2BA;HIST1H2BB;HIST1H2BC;HIST1H2BD;HIST1H2BH;HIST1H2BK;HIST1H2BL;HIST1H2BM;HIST1H2BN;HIST1H2BO;HIST1H3A;HIST1H4A;HIST2H2AA3;HIST2H2AC;HIST2H2BE;HIST2H3A;HIST3H2BB;HIST3H3;MCPH1;NCAPG2;NCAPH2;PHF8;PLK1;RB1;SET;SETD8;SMC2;SMC4
Type I diabetes mellitus	KEGG_2019_Human	115	3	10B18_CNV_3;10C3_CNV_1;5A3_CNV_2	CD28;CD80;CD86;CPE;FAS;HLA-A;HLA-B;HLA-C;HLA-DMA;HLA-DMB;HLA-DOA;HLA-DOB;HLA-DPA1;HLA-DPB1;HLA-DQA1;HLA-DQA2;HLA-DQB1;HLA-DRA;HLA-DRB1;HLA-DRB5;HLA-E;HLA-F;HLA-G;IL12A;IL12B;IL1A;IL1B;IL2;INS;LTA;PTPRN;PTPRN2;TNF
Defensins_Homo sapiens_R-HSA-1461973	Reactome_2016	122	3	5A11_CNV_3;NM3a3_LowPass_2;NM4a4_LowPass_3	ART1;CCR6;CD4;DEFA1;DEFA3;DEFA4;DEFA5;DEFA6;DEFB1;DEFB103A;DEFB104A;DEFB105A;DEFB106A;DEFB107A;DEFB108B;DEFB110;DEFB112;DEFB113;DEFB114;DEFB115;DEFB116;DEFB118;DEFB119;DEFB121;DEFB123;DEFB124;DEFB125;DEFB127;DEFB129;DEFB130;DEFB131;DEFB132;DEFB133;DEFB134;DEFB135;DEFB136;DEFB4A;PRSS3;TLR1;TLR2
Deposition of new CENPA-containing nucleosomes at the centromere_Homo sapiens_R-HSA-606279	Reactome_2016	131	3	10B18_CNV_3;10C3_CNV_1;5A7_CNV_2	APITD1;CENPC;CENPH;CENPI;CENPK;CENPL;CENPM;CENPN;CENPP;CENPQ;CENPT;CENPU;CENPW;H2AFX;H2AFZ;HIST1H2AB;HIST1H2AC;HIST1H2AD;HIST1H2AJ;HIST1H2BA;HIST1H2BB;HIST1H2BC;HIST1H2BD;HIST1H2BH;HIST1H2BK;HIST1H2BL;HIST1H2BM;HIST1H2BN;HIST1H2BO;HIST1H4A;HIST2H2AA3;HIST2H2AC;HIST2H2BE;HIST3H2BB;HJURP;ITGB3BP;MIS18A;NPM1;RBBP7;RSF1;RUVBL1;SMARCA5;STRA13
Nucleosome assembly_Homo sapiens_R-HSA-774815	Reactome_2016	131	3	10B18_CNV_3;10C3_CNV_1;5A7_CNV_2	APITD1;CENPC;CENPH;CENPI;CENPK;CENPL;CENPM;CENPN;CENPP;CENPQ;CENPT;CENPU;CENPW;H2AFX;H2AFZ;HIST1H2AB;HIST1H2AC;HIST1H2AD;HIST1H2AJ;HIST1H2BA;HIST1H2BB;HIST1H2BC;HIST1H2BD;HIST1H2BH;HIST1H2BK;HIST1H2BL;HIST1H2BM;HIST1H2BN;HIST1H2BO;HIST1H4A;HIST2H2AA3;HIST2H2AC;HIST2H2BE;HIST3H2BB;HJURP;ITGB3BP;MIS18A;NPM1;RBBP7;RSF1;RUVBL1;SMARCA5;STRA13
extracellular ligand-gated ion channel activity (GO:0005230)	GO_Molecular_Function_2018	133	3	5A11_CNV_3;5A3_CNV_2;NM4a3_LowPass_3	CHRFAM7A;CHRNA1;CHRNA10;CHRNA2;CHRNA4;CHRNA6;CHRNA7;CHRNA9;CHRNB1;CHRNB3;CHRND;CHRNE;CHRNG;GABRA1;GABRA2;GABRA3;GABRA4;GABRA5;GABRA6;GABRB1;GABRB2;GABRB3;GABRD;GABRE;GABRG1;GABRG2;GABRG3;GABRP;GABRQ;GABRR2;GLRA1;GLRA3;GLRA4;GLRB;GRIA1;GRIA2;GRIA3;GRIA4;HTR3A;HTR3B;HTR3C;HTR3D;HTR3E;TRPV1;ZACN
RNA Polymerase I Chain Elongation_Homo sapiens_R-HSA-73777	Reactome_2016	138	3	10B18_CNV_3;10C3_CNV_1;16B3_CNV_4	CBX3;CCNH;CD3EAP;CDK7;ERCC2;ERCC3;GTF2H1;GTF2H2;GTF2H4;H2AFX;H2AFZ;H3F3A;HIST1H2AB;HIST1H2AC;HIST1H2AD;HIST1H2AJ;HIST1H2BA;HIST1H2BB;HIST1H2BC;HIST1H2BD;HIST1H2BH;HIST1H2BK;HIST1H2BL;HIST1H2BM;HIST1H2BN;HIST1H2BO;HIST1H3A;HIST1H4A;HIST3H2BB;MNAT1;POLR1A;POLR1B;POLR1C;POLR1D;POLR1E;POLR2F;POLR2H;POLR2L;TAF1A;TAF1B;UBTF;ZNRD1
Telomere Maintenance_Homo sapiens_R-HSA-157579	Reactome_2016	140	3	10B18_CNV_3;10C3_CNV_1;16B3_CNV_4	ACD;FEN1;H2AFX;H2AFZ;HIST1H2AB;HIST1H2AC;HIST1H2AD;HIST1H2AJ;HIST1H2BA;HIST1H2BB;HIST1H2BC;HIST1H2BD;HIST1H2BH;HIST1H2BK;HIST1H2BL;HIST1H2BM;HIST1H2BN;HIST1H2BO;HIST1H4A;HIST3H2BB;HIST3H3;LIG1;PCNA;POLA1;POLA2;POLD1;POLD2;POLD3;POLD4;POT1;PRIM1;RFC2;RFC3;RFC4;RUVBL1;RUVBL2;TERF2IP;TERT
RHO GTPases activate PKNs_Homo sapiens_R-HSA-5625740	Reactome_2016	142	3	10B18_CNV_3;10C3_CNV_1;16B3_CNV_4	CDC25C;H2AFX;H2AFZ;H3F3A;HIST1H2AB;HIST1H2AC;HIST1H2AD;HIST1H2AJ;HIST1H2BA;HIST1H2BB;HIST1H2BC;HIST1H2BD;HIST1H2BH;HIST1H2BK;HIST1H2BL;HIST1H2BM;HIST1H2BN;HIST1H2BO;HIST1H3A;HIST1H4A;HIST3H2BB;KDM4C;KLK2;KLK3;MYH11;MYH14;MYH9;MYL12B;MYL6;PKN1;PKN3;PPP1CB;PPP1R12A;PPP1R12B;RHOA;RHOB;YWHAG;YWHAQ
cellular response to type I interferon (GO:0071357)	GO_Biological_Process_2018	150	3	10C3_CNV_1;NM3a4_LowPass_2;NM4b1_LowPass_4	BST2;HFE;HLA-A;HLA-B;HLA-C;HLA-E;HLA-F;HLA-G;IFIT1;IFIT2;IFIT3;IFNA1;IFNA10;IFNA14;IFNA16;IFNA17;IFNA2;IFNA21;IFNA4;IFNA5;IFNA6;IFNA7;IFNA8;IFNAR1;IFNAR2;IFNB1;IP6K2;IRF1;IRF2;IRF3;IRF8;ISG20;MX1;MX2;SP100;STAT2
type I interferon signaling pathway (GO:0060337)	GO_Biological_Process_2018	150	3	10C3_CNV_1;NM3a4_LowPass_2;NM4b1_LowPass_4	BST2;HFE;HLA-A;HLA-B;HLA-C;HLA-E;HLA-F;HLA-G;IFIT1;IFIT2;IFIT3;IFNA1;IFNA10;IFNA14;IFNA16;IFNA17;IFNA2;IFNA21;IFNA4;IFNA5;IFNA6;IFNA7;IFNA8;IFNAR1;IFNAR2;IFNB1;IP6K2;IRF1;IRF2;IRF3;IRF8;ISG20;MX1;MX2;SP100;STAT2
Interferon alpha/beta signaling_Homo sapiens_R-HSA-909733	Reactome_2016	152	3	10C3_CNV_1;NM3a4_LowPass_2;NM4b1_LowPass_4	BST2;HLA-A;HLA-B;HLA-C;HLA-E;HLA-F;HLA-G;IFIT1;IFIT2;IFIT3;IFNA1;IFNA10;IFNA14;IFNA16;IFNA17;IFNA2;IFNA21;IFNA4;IFNA5;IFNA6;IFNA7;IFNA8;IFNAR1;IFNAR2;IFNB1;IP6K2;IRF1;IRF2;IRF3;IRF8;ISG20;MX1;MX2;SOCS3;STAT2
Transcriptional regulation by small RNAs_Homo sapiens_R-HSA-5578749	Reactome_2016	157	3	10B18_CNV_3;10C3_CNV_1;16B3_CNV_4	AAAS;AGO1;H2AFX;H2AFZ;H3F3A;HIST1H2AB;HIST1H2AC;HIST1H2AD;HIST1H2AJ;HIST1H2BA;HIST1H2BB;HIST1H2BC;HIST1H2BD;HIST1H2BH;HIST1H2BK;HIST1H2BL;HIST1H2BM;HIST1H2BN;HIST1H2BO;HIST1H3A;HIST1H4A;HIST3H2BB;IPO8;NUP153;NUP155;NUP160;NUP188;NUP205;NUP214;NUP35;NUP50;NUP62;NUP85;NUP98;NUPL2;POLR2C;POLR2D;POLR2F;POLR2G;POLR2H;POLR2J;POLR2L;POM121;POM121C;RANBP2
cytokine receptor activity (GO:0004896)	GO_Molecular_Function_2018	160	3	10B11_CNV_1;10B6_CNV_2;NM3a5_LowPass_2	ACKR2;ACKR4;CCR1;CCR2;CCR3;CCR4;CCR5;CCR6;CCR8;CCR9;CD74;CMKLR1;CNTFR;CRLF2;CSF2RB;CX3CR1;CXCR1;CXCR3;EBI3;EPOR;FLT3;GFRA1;GFRA2;GFRA4;GFRAL;GPR17;IFNGR1;IFNLR1;IL10RA;IL12RB2;IL13RA2;IL15RA;IL17RA;IL17RB;IL17RC;IL17RD;IL17RE;IL1R1;IL1R2;IL1RAPL2;IL1RL1;IL1RL2;IL20RA;IL20RB;IL22RA1;IL22RA2;IL23R;IL2RA;IL2RG;IL31RA;IL3RA;IL5RA;IL6R;IL6ST;IL7R;LEPR;LIFR;MPL;OSMR;PRLR
Senescence-Associated Secretory Phenotype (SASP)_Homo sapiens_R-HSA-2559582	Reactome_2016	163	3	10B18_CNV_3;10C3_CNV_1;5A7_CNV_2	ANAPC1;ANAPC11;ANAPC15;ANAPC16;ANAPC2;ANAPC5;ANAPC7;CCNA1;CCNA2;CDC16;CDC23;CDC26;CDC27;CDK2;CDK4;CDK6;CDKN1A;CDKN1B;CDKN2A;CDKN2B;CEBPB;EHMT1;EHMT2;FOS;H2AFX;H2AFZ;H3F3A;HIST1H2AB;HIST1H2AC;HIST1H2AD;HIST1H2AJ;HIST1H2BA;HIST1H2BB;HIST1H2BC;HIST1H2BD;HIST1H2BH;HIST1H2BK;HIST1H2BL;HIST1H2BM;HIST1H2BN;HIST1H2BO;HIST1H3A;HIST1H4A;HIST2H2AA3;HIST2H2AC;HIST2H2BE;HIST2H3A;HIST3H2BB;IGFBP7;IL1A;IL6;MAPK…
Activation of anterior HOX genes in hindbrain development during early embryogenesis_Homo sapiens_R-HSA-5617472	Reactome_2016	178	3	10B18_CNV_3;10C3_CNV_1;16B3_CNV_4	CTCF;EP300;EZH2;H2AFX;H2AFZ;H3F3A;HDAC3;HIST1H2AB;HIST1H2AC;HIST1H2AD;HIST1H2AJ;HIST1H2BA;HIST1H2BB;HIST1H2BC;HIST1H2BD;HIST1H2BH;HIST1H2BK;HIST1H2BL;HIST1H2BM;HIST1H2BN;HIST1H2BO;HIST1H3A;HIST1H4A;HIST3H2BB;HOXA1;HOXA2;HOXA3;HOXA4;HOXB1;HOXB2;HOXB3;HOXB4;HOXC4;HOXD1;HOXD3;HOXD4;KMT2C;KMT2D;MEIS1;PAX6;PAXIP1;PBX1;PCGF2;POLR2C;POLR2D;POLR2F;POLR2G;POLR2H;POLR2J;POLR2L;RARA;RARB;RARG;RQCD1;RXRA;SUZ…
Activation of HOX genes during differentiation_Homo sapiens_R-HSA-5619507	Reactome_2016	178	3	10B18_CNV_3;10C3_CNV_1;16B3_CNV_4	CTCF;EP300;EZH2;H2AFX;H2AFZ;H3F3A;HDAC3;HIST1H2AB;HIST1H2AC;HIST1H2AD;HIST1H2AJ;HIST1H2BA;HIST1H2BB;HIST1H2BC;HIST1H2BD;HIST1H2BH;HIST1H2BK;HIST1H2BL;HIST1H2BM;HIST1H2BN;HIST1H2BO;HIST1H3A;HIST1H4A;HIST3H2BB;HOXA1;HOXA2;HOXA3;HOXA4;HOXB1;HOXB2;HOXB3;HOXB4;HOXC4;HOXD1;HOXD3;HOXD4;KMT2C;KMT2D;MEIS1;PAX6;PAXIP1;PBX1;PCGF2;POLR2C;POLR2D;POLR2F;POLR2G;POLR2H;POLR2J;POLR2L;RARA;RARB;RARG;RQCD1;RXRA;SUZ…
regulation of cytokine-mediated signaling pathway (GO:0001959)	GO_Biological_Process_2018	180	3	10C3_CNV_1;NM3a4_LowPass_2;NM4b1_LowPass_4	AGPAT1;CD74;CLIP3;ELF1;IFNA1;IFNA10;IFNA14;IFNA16;IFNA17;IFNA2;IFNA21;IFNA4;IFNA5;IFNA6;IFNA7;IFNA8;IFNAR1;IFNAR2;IFNB1;IFNGR1;IFNGR2;IL3;JAK2;LIFR;PALM3;RBCK1;RIPK1;RUNX1;SOCS3;SPHK1;STAT2;TAX1BP1;TNF;TNFAIP3;TRIM44;TSLP;UBA52
flavonoid glucuronidation (GO:0052696)	GO_Biological_Process_2018	1	2	10C5_CNV_1;NM4a2_LowPass_3	UGT1A1;UGT1A10;UGT1A4;UGT1A6;UGT1A7;UGT1A8
salt transmembrane transporter activity (GO:1901702)	GO_Molecular_Function_2018	1	2	16B3_CNV_4;NM6b3_LowPass_2	SLC17A3;SLC22A10;SLC22A11;SLC22A12;SLC22A24;SLC22A25;SLC22A6;SLC22A9;SLC2A9
urate transmembrane transporter activity (GO:0015143)	GO_Molecular_Function_2018	1	2	16B3_CNV_4;NM6b3_LowPass_2	SLC17A3;SLC22A10;SLC22A11;SLC22A12;SLC22A24;SLC22A25;SLC22A6;SLC22A9;SLC2A9
cellular divalent inorganic cation homeostasis (GO:0072503)	GO_Biological_Process_2018	3	2	10C5_CNV_1;NM4b9_LowPass_4	ATP2B1;ATP2C2;CASR;CCL1;CCL11;CCL13;CCL14;CCL15;CCL23;CCL3;CCL5;CCL7;CCL8;CHRNA7;DRD4;DRD5;GCM2;HTR2A;HTR2B;MT1A;MT1B;MT1E;MT1F;MT1G;MT1H;MT1M;MT1X;MT2A;MT3;MT4;RGN;SLC24A2;SLC39A13;SLC39A8;STIM1;TPT1
detection of chemical stimulus involved in sensory perception (GO:0050907)	GO_Biological_Process_2018	4	2	NM7a6_LowPass_3;NM7a7_LowPass_3	OR4E2;OR4K1;OR4K13;OR4K14;OR4K15;OR4K17;OR4K2;OR4K5;OR4L1;OR4M1;OR4N2;OR4N5;OR4Q3
HATs acetylate histones_Homo sapiens_R-HSA-3214847	Reactome_2016	8	2	10B18_CNV_3;10C3_CNV_1	ACTL6A;ATXN7;ATXN7L3;BRD1;BRD8;BRPF3;CSRP2BP;ELP3;ELP6;ENY2;EP300;HIST1H2AA;HIST1H2AB;HIST1H2AC;HIST1H2AD;HIST1H2AG;HIST1H2AH;HIST1H2AJ;HIST1H2BA;HIST1H2BB;HIST1H2BC;HIST1H2BD;HIST1H2BH;HIST1H2BK;HIST1H2BL;HIST1H2BM;HIST1H2BN;HIST1H2BO;HIST1H3A;HIST1H4A;HIST3H2A;HIST3H2BB;IKBKAP;ING4;ING5;JADE2;KANSL1;KANSL2;KAT2A;KAT7;MCRS1;MEAF6;MSL1;MSL2;RUVBL1;SAP130;SUPT20H;TADA2A;WDR5;YEATS2
Mitotic Prophase_Homo sapiens_R-HSA-68875	Reactome_2016	8	2	10C3_CNV_1;5A7_CNV_2	AAAS;ARPP19;CDK1;CNEP1R1;CTDNEP1;EMD;ENSA;H2AFZ;H3F3A;HIST1H2AB;HIST1H2AC;HIST1H2AD;HIST1H2AJ;HIST1H2BA;HIST1H2BB;HIST1H2BC;HIST1H2BD;HIST1H2BH;HIST1H2BK;HIST1H2BL;HIST1H2BM;HIST1H2BN;HIST1H2BO;HIST1H3A;HIST1H4A;HIST2H2AA3;HIST2H2AC;HIST2H2BE;HIST2H3A;HIST3H2BB;HIST3H3;LMNB1;LPIN3;MAPK3;MCPH1;NCAPG2;NEK6;NEK7;NUP153;NUP155;NUP160;NUP205;NUP210;NUP37;NUP43;NUP54;NUP62;NUP85;NUP93;NUPL2;PHF8;PLK1;P…
regulation of triglyceride catabolic process (GO:0010896)	GO_Biological_Process_2018	11	2	NM2c3_LowPass_4;NM3a4_LowPass_2	APOA1;APOA4;APOA5;APOC2;APOC3
benzodiazepine receptor activity (GO:0008503)	GO_Molecular_Function_2018	11	2	5A3_CNV_2;NM4a3_LowPass_3	GABRA1;GABRA2;GABRA3;GABRA4;GABRA5;GABRA6;GABRE;GABRG1;GABRG2;GABRG3
CYP2E1 reactions_Homo sapiens_R-HSA-211999	Reactome_2016	11	2	NM3a1_LowPass_2;NM4b10_LowPass_4	CYP2A13;CYP2A6;CYP2A7;CYP2B6;CYP2F1;CYP2S1
positive regulation of transcription, DNA-templated (GO:0045893)	GO_Biological_Process_2018	13	2	NM4b1_LowPass_4;NM4b4_LowPass_4	AATF;ABRA;ACVRL1;AFAP1L2;AGT;AHR;AHRR;AKAP8L;ALX1;ALYREF;ARF4;ARNT;ARNTL2;ATF1;ATF3;ATF4;ATF5;ATF7IP;ATMIN;ATOH8;ATXN7L3;BCL11B;BCL2L12;BLM;BMP4;BMP6;BRCA1;BRCA2;BRD4;CALCOCO1;CAMKK2;CAPRIN2;CCDC62;CCNE1;CCNK;CD38;CD74;CDH13;CDK12;CDK7;CDK8;CDKN2B;CDX1;CEBPA;CEBPB;CEBPE;CEBPG;CEP290;CHCHD2;CITED4;CKAP2;CLOCK;COL1A1;COPS5;CREB3L4;CREBL2;CREBRF;CRLF3;CRTC1;CRTC2;CRTC3;CRX;CSF3;CSRNP2;CTBP2;DAB2;DBP…
cytidine to uridine editing (GO:0016554)	GO_Biological_Process_2018	18	2	NM4b1_LowPass_4;NM6b2_LowPass_2	AICDA;APOBEC1;APOBEC3A;APOBEC3B;APOBEC3C;APOBEC3D;APOBEC3F;APOBEC3G;APOBEC3H
regulation of cholesterol esterification (GO:0010872)	GO_Biological_Process_2018	18	2	NM2c3_LowPass_4;NM3a4_LowPass_2	APOA1;APOA4;APOA5;APOC1;APOE;LAMTOR1
synaptic transmission, GABAergic (GO:0051932)	GO_Biological_Process_2018	18	2	NM3a6_LowPass_2;NM4a3_LowPass_3	GABRA1;GABRA2;GABRA3;GABRA4;GABRA6;GABRB2;GABRE;GABRG1;GABRG2
Eicosanoids_Homo sapiens_R-HSA-211979	Reactome_2016	18	2	NM4a2_LowPass_3;NM4b1_LowPass_4	CYP4A11;CYP4A22;CYP4B1;CYP4F11;CYP4F12;CYP4F2;CYP4F22;CYP4F3
phospholipid efflux (GO:0033700)	GO_Biological_Process_2018	21	2	NM2c3_LowPass_4;NM3a4_LowPass_2	APOA1;APOA4;APOA5;APOC1;APOC2;APOC3;APOE
GABA-gated chloride ion channel activity (GO:0022851)	GO_Molecular_Function_2018	21	2	5A3_CNV_2;NM4a3_LowPass_3	GABRA1;GABRA2;GABRA3;GABRA4;GABRA5;GABRA6;GABRB1;GABRB3;GABRE;GABRG1;GABRG2;GABRG3
GABA A receptor activation_Homo sapiens_R-HSA-977441	Reactome_2016	21	2	5A3_CNV_2;NM4a3_LowPass_3	GABRA1;GABRA2;GABRA3;GABRA4;GABRA5;GABRA6;GABRB1;GABRB2;GABRB3;GABRG2;GABRG3;GABRQ
MHC class II protein complex (GO:0042613)	GO_Cellular_Component_2018	34	2	10B18_CNV_3;5A3_CNV_2	CD74;HLA-DMA;HLA-DMB;HLA-DOA;HLA-DOB;HLA-DPA1;HLA-DPB1;HLA-DQA1;HLA-DQB1;HLA-DQB2;HLA-DRA;HLA-DRB1;HLA-DRB5
inhibitory extracellular ligand-gated ion channel activity (GO:0005237)	GO_Molecular_Function_2018	40	2	5A3_CNV_2;NM4a3_LowPass_3	GABRA1;GABRA2;GABRA3;GABRA4;GABRA5;GABRA6;GABRE;GABRG1;GABRG2;GABRG3;GLRA1;GLRA4;GLRB
purinergic nucleotide receptor activity (GO:0001614)	GO_Molecular_Function_2018	40	2	10B10_CNV_2;NM3a5_LowPass_2	GPR171;GPR34;GPR87;P2RX2;P2RX3;P2RX4;P2RX6;P2RX7;P2RY1;P2RY12;P2RY13;P2RY14;PTAFR
Acyl chain remodelling of PI_Homo sapiens_R-HSA-1482922	Reactome_2016	40	2	10C5_CNV_1;NM6b1_LowPass_2	PLA2G12A;PLA2G2A;PLA2G2D;PLA2G2E;PLA2G2F;PLA2G4A;PLA2G4C;PLA2G4D;PLA2G4E;PLA2G4F;PLA2G5
Cellular Senescence_Homo sapiens_R-HSA-2559583	Reactome_2016	42	2	10B18_CNV_3;10C3_CNV_1	ACD;AGO1;AGO3;AGO4;ANAPC1;ANAPC11;ANAPC15;ANAPC2;ATM;CABIN1;CBX2;CBX4;CBX6;CBX8;CDC16;CDC23;CDC26;CDC27;CDK2;CDK4;CDKN1A;CDKN2A;CDKN2B;E2F3;EHMT1;EHMT2;ETS2;EZH2;FOS;H1F0;H2AFX;H2AFZ;H3F3A;HIRA;HIST1H1A;HIST1H1B;HIST1H1C;HIST1H1D;HIST1H1E;HIST1H2AB;HIST1H2AC;HIST1H2AD;HIST1H2AJ;HIST1H2BA;HIST1H2BB;HIST1H2BC;HIST1H2BD;HIST1H2BH;HIST1H2BK;HIST1H2BL;HIST1H2BM;HIST1H2BN;HIST1H2BO;HIST1H3A;HIST1H4A;HI…
Hepatitis B	KEGG_2019_Human	44	2	10C3_CNV_1;NM3a4_LowPass_2	ATF6B;BIRC5;BRAF;CASP12;CDK2;CREB3;CREB3L2;CREB5;CYCS;DDX58;EGR3;FADD;FAS;GRB2;IFNA1;IFNA10;IFNA13;IFNA14;IFNA16;IFNA17;IFNA2;IFNA21;IFNA4;IFNA5;IFNA6;IFNA7;IFNA8;IFNB1;JAK2;MAP2K6;MAP3K7;PTK2B;RB1;RELA;STAT2;STAT6;TGFBR1;TICAM2;TNF
Acyl chain remodelling of PG_Homo sapiens_R-HSA-1482925	Reactome_2016	47	2	10C5_CNV_1;NM6b1_LowPass_2	LPCAT4;PLA2G12A;PLA2G2A;PLA2G2D;PLA2G2E;PLA2G2F;PLA2G3;PLA2G4A;PLA2G4B;PLA2G4D;PLA2G4F;PLA2G5
Acyl chain remodelling of PS_Homo sapiens_R-HSA-1482801	Reactome_2016	47	2	10C5_CNV_1;NM6b1_LowPass_2	LPCAT4;PLA2G12A;PLA2G2A;PLA2G2D;PLA2G2E;PLA2G2F;PLA2G4A;PLA2G4B;PLA2G4D;PLA2G4E;PLA2G4F;PLA2G5
Tuberculosis	KEGG_2019_Human	51	2	10C3_CNV_1;NM3a4_LowPass_2	ATP6V0A4;CAMP;CYCS;CYP27B1;FADD;HLA-DQA1;HLA-DQB1;HLA-DRA;HLA-DRB1;HLA-DRB5;IFNA1;IFNA10;IFNA13;IFNA14;IFNA16;IFNA17;IFNA2;IFNA21;IFNA4;IFNA5;IFNA6;IFNA7;IFNA8;IFNB1;IFNGR1;IL10RA;IL18;IL23A;JAK2;PPP3CC;PPP3R2;RAB5B;RELA;RFXAP;RHOA;SPHK1;TCIRG1;TLR9;TNF
arachidonic acid epoxygenase activity (GO:0008392)	GO_Molecular_Function_2018	52	2	NM3a1_LowPass_2;NM4b10_LowPass_4	CYP2A13;CYP2A6;CYP2A7;CYP2B6;CYP2F1;CYP2S1
arachidonic acid monooxygenase activity (GO:0008391)	GO_Molecular_Function_2018	52	2	NM3a1_LowPass_2;NM4b10_LowPass_4	CYP2A13;CYP2A6;CYP2A7;CYP2B6;CYP2F1;CYP2S1
Kaposi sarcoma-associated herpesvirus infection	KEGG_2019_Human	55	2	10C3_CNV_1;NM3a4_LowPass_2	CCND1;CDK4;CSF2;CYCS;FADD;FAS;GNG10;HLA-A;HLA-B;HLA-C;HLA-E;HLA-F;HLA-G;IFNA1;IFNA10;IFNA13;IFNA14;IFNA16;IFNA17;IFNA2;IFNA21;IFNA4;IFNA5;IFNA6;IFNA7;IFNA8;IFNB1;IFNGR1;JAK2;MAP2K6;MICA;MICB;PPP3CC;PPP3R2;RB1;RELA;STAT2
regulation of GTPase activity (GO:0043087)	GO_Biological_Process_2018	57	2	NM2c1_LowPass_4;NM4b9_LowPass_4	ADAP1;ARHGAP1;ARHGAP23;BCAS3;CCL1;CCL11;CCL13;CCL14;CCL15;CCL16;CCL18;CCL2;CCL23;CCL3;CCL3L1;CCL4;CCL4L1;CCL5;CCL7;CCL8;ERBB2;FICD;FZD10;HRAS;PLXNB2;STMN3
phosphatidylglycerol acyl-chain remodeling (GO:0036148)	GO_Biological_Process_2018	58	2	10C5_CNV_1;NM6b1_LowPass_2	LPCAT4;PLA2G12A;PLA2G2A;PLA2G2D;PLA2G2E;PLA2G2F;PLA2G3;PLA2G4A;PLA2G4B;PLA2G4D;PLA2G4F;PLA2G5
ligand-gated anion channel activity (GO:0099095)	GO_Molecular_Function_2018	58	2	5A3_CNV_2;NM4a3_LowPass_3	GABRA1;GABRA2;GABRA3;GABRA4;GABRA5;GABRA6;GABRB1;GABRB3;GABRE;GABRG1;GABRG2;GABRG3;GLRA1;GLRA4;GLRB
Peptide ligand-binding receptors_Homo sapiens_R-HSA-375276	Reactome_2016	61	2	10B6_CNV_2;5A4_CNV_2	ACKR2;ACKR3;ACKR4;AGTR1;ANXA1;APLN;APLNR;AVPR1B;C5;CCK;CCL1;CCL11;CCL16;CCL19;CCL2;CCL20;CCL21;CCL23;CCL27;CCL28;CCL3;CCL3L1;CCL4;CCL5;CCL7;CCR1;CCR10;CCR2;CCR3;CCR4;CCR5;CCR6;CCR7;CCR8;CCR9;CCRL2;CX3CR1;CXCL1;CXCL10;CXCL11;CXCL12;CXCL13;CXCL2;CXCL3;CXCL5;CXCL6;CXCL9;CXCR1;CXCR2;CXCR3;CXCR4;CXCR5;CXCR6;EDN1;EDNRA;EDNRB;F2;F2R;F2RL1;F2RL2;GALR1;GHRL;GHSR;GPR37L1;GRPR;HCRT;HEBP1;KISS1;KISS1R;KNG1;M…
Interferon Signaling_Homo sapiens_R-HSA-913531	Reactome_2016	63	2	10C3_CNV_1;10C5_CNV_1	AAAS;DDX58;EIF4A3;EIF4E2;EIF4E3;EIF4G3;GBP1;GBP2;GBP3;GBP4;GBP5;GBP6;GBP7;HLA-A;HLA-B;HLA-C;HLA-DQA1;HLA-DQB1;HLA-DRA;HLA-DRB1;HLA-DRB5;HLA-E;HLA-F;HLA-G;IFIT1;IFIT2;IFIT3;IFNA1;IFNA10;IFNA14;IFNA16;IFNA17;IFNA2;IFNA21;IFNA4;IFNA5;IFNA6;IFNA7;IFNA8;IFNB1;IFNGR1;IRF1;JAK2;KPNA1;KPNA2;KPNA3;MT2A;NCAM1;NDC1;NUP155;NUP188;NUP205;NUP50;NUP54;NUP85;NUP93;PRKCD;RANBP2;SOCS3;SP100;STAT2;TPR;TRIM10;TRIM14…
GABA-A receptor complex (GO:1902711)	GO_Cellular_Component_2018	65	2	5A3_CNV_2;NM4a3_LowPass_3	GABRA1;GABRA2;GABRA3;GABRA4;GABRA5;GABRA6;GABRB1;GABRB2;GABRB3;GABRE;GABRG1;GABRG2;GABRG3;GABRP;GABRQ
Epstein-Barr virus infection	KEGG_2019_Human	66	2	10C3_CNV_1;NM3a4_LowPass_2	BLNK;CCND1;CD3D;CD3E;CD3G;CDK2;CDK4;CYCS;DDX58;ENTPD1;FADD;FAS;HLA-A;HLA-B;HLA-C;HLA-DQA1;HLA-DQB1;HLA-DRA;HLA-DRB1;HLA-DRB5;HLA-E;HLA-F;HLA-G;IFNA1;IFNA10;IFNA13;IFNA14;IFNA16;IFNA17;IFNA2;IFNA21;IFNA4;IFNA5;IFNA6;IFNA7;IFNA8;IFNB1;MAP2K6;MAP3K7;PSMD1;PSMD6;RB1;RELA;SAP30;STAT2;TNF;TNFAIP3
Human immunodeficiency virus 1 infection	KEGG_2019_Human	70	2	NM3a4_LowPass_2;NM4b1_LowPass_4	AKT2;AP1M1;APOBEC3A;APOBEC3B;APOBEC3C;APOBEC3D;APOBEC3F;APOBEC3G;APOBEC3H;BAX;BST2;CALM3;CALR;CASP3;CCNB1;CD3D;CD3E;CD3G;CFL1;FADD;FBXW11;GNAI2;GNG5;GNG8;IFNA1;IFNA10;IFNA13;IFNA14;IFNA16;IFNA17;IFNA2;IFNA21;IFNA4;IFNA5;IFNA6;IFNA7;IFNA8;IFNB1;IRF3;ITPR2;KRAS;LIMK2;NRAS;PAK4;PIK3R1;PIK3R2;PIK3R3;PLCG2;RAC2;RELA;RIPK1;RPS6KB2;TRAF6
Human T-cell leukemia virus 1 infection	KEGG_2019_Human	71	2	10B18_CNV_3;5A3_CNV_2	ADCY1;ADCY2;ADCY3;ADCY5;ADCY6;ADCY8;AKT2;AKT3;ANAPC1;ANAPC10;ANAPC2;ANAPC4;ATF2;ATF4;ATF6B;ATR;B2M;BUB1B;CALR;CANX;CCNA2;CCND2;CCND3;CCNE1;CCNE2;CD3D;CD3E;CD3G;CD4;CDC16;CDC23;CDC26;CDC27;CDK2;CDK4;CDKN1A;CHEK2;CREB1;CREB3;CRTC1;CRTC3;CSF2;DLG1;E2F3;EGR1;EP300;ESPL1;ETS2;FOS;FOSL1;GPS2;HLA-A;HLA-B;HLA-C;HLA-DMA;HLA-DMB;HLA-DOA;HLA-DOB;HLA-DPA1;HLA-DPB1;HLA-DQA1;HLA-DQA2;HLA-DQB1;HLA-DRA;HLA-DRB1;…
phosphatidylserine acyl-chain remodeling (GO:0036150)	GO_Biological_Process_2018	72	2	10C5_CNV_1;NM6b1_LowPass_2	LPCAT4;OSBPL8;PLA1A;PLA2G12A;PLA2G2A;PLA2G2D;PLA2G2E;PLA2G2F;PLA2G4A;PLA2G4B;PLA2G4D;PLA2G4E;PLA2G4F;PLA2G5
Acyl chain remodelling of PE_Homo sapiens_R-HSA-1482839	Reactome_2016	74	2	10C5_CNV_1;NM6b1_LowPass_2	LPCAT4;MBOAT2;PLA2G12A;PLA2G2A;PLA2G2D;PLA2G2E;PLA2G2F;PLA2G3;PLA2G4A;PLA2G4B;PLA2G4C;PLA2G4D;PLA2G4E;PLA2G4F;PLA2G5
Acyl chain remodelling of PC_Homo sapiens_R-HSA-1482788	Reactome_2016	82	2	10C5_CNV_1;NM6b1_LowPass_2	LPCAT2;LPCAT4;MBOAT2;PLA2G12A;PLA2G2A;PLA2G2D;PLA2G2E;PLA2G2F;PLA2G3;PLA2G4A;PLA2G4B;PLA2G4C;PLA2G4D;PLA2G4E;PLA2G4F;PLA2G5;PLB1
inflammatory response (GO:0006954)	GO_Biological_Process_2018	84	2	16A1_CNV_4;16B3_CNV_4	ADORA3;ALOX15;AOC3;APOL3;BDKRB2;BMP2;C5AR1;C5AR2;CCL1;CCL11;CCL13;CCL14;CCL15;CCL16;CCL17;CCL18;CCL19;CCL2;CCL20;CCL21;CCL22;CCL23;CCL24;CCL26;CCL3;CCL3L1;CCL4;CCL4L1;CCL5;CCL7;CCL8;CCR7;CCRL2;CD180;CD40LG;CD6;CRHBP;CRP;CX3CL1;CXCL13;CXCR2;CXCR4;DHX8;DLC1;EPHX2;F11R;F2R;FCGR2B;FOLR2;FOS;FPR1;FPR2;FPR3;GPR32;GPR68;HDAC4;HDAC5;HPR;HYAL1;HYAL3;IKBKB;IL10RB;IL18RAP;IL1A;IL1B;KLK1;KLK2;KLK3;KRT16;LGAL…
Ascorbate and aldarate metabolism	KEGG_2019_Human	87	2	NM6b1_LowPass_2;NM6b3_LowPass_2	ALDH1B1;ALDH2;UGDH;UGT2A1;UGT2A2;UGT2A3;UGT2B10;UGT2B11;UGT2B15;UGT2B17;UGT2B28;UGT2B4;UGT2B7
phosphatidylcholine acyl-chain remodeling (GO:0036151)	GO_Biological_Process_2018	89	2	10C5_CNV_1;NM6b1_LowPass_2	DBI;LPCAT2;LPCAT4;MBOAT2;PLA2G12A;PLA2G2A;PLA2G2D;PLA2G2E;PLA2G2F;PLA2G3;PLA2G4A;PLA2G4B;PLA2G4C;PLA2G4D;PLA2G4E;PLA2G4F;PLA2G5;PLB1
Asthma	KEGG_2019_Human	93	2	10B18_CNV_3;10C3_CNV_1	CCL11;CD40LG;HLA-DMA;HLA-DMB;HLA-DOA;HLA-DOB;HLA-DPA1;HLA-DPB1;HLA-DQA1;HLA-DQA2;HLA-DQB1;HLA-DRA;HLA-DRB1;HLA-DRB5;IL13;IL3;IL4;IL5;IL9;TNF
cellular zinc ion homeostasis (GO:0006882)	GO_Biological_Process_2018	95	2	10C5_CNV_1;NM3a6_LowPass_2	ATP13A2;MT1A;MT1B;MT1E;MT1F;MT1G;MT1H;MT1M;MT1X;MT2A;MT3;MT4;SLC30A5;SLC30A8;SLC39A8
Class A/1 (Rhodopsin-like receptors)_Homo sapiens_R-HSA-373076	Reactome_2016	96	2	10B6_CNV_2;5A4_CNV_2	ACKR2;ACKR3;ACKR4;ADORA1;ADORA2B;ADRA1A;ADRA1B;ADRA2A;ADRA2B;ADRB1;ADRB2;AGTR1;ANXA1;APLN;APLNR;AVPR1B;C5;CCK;CCL1;CCL11;CCL16;CCL19;CCL2;CCL20;CCL21;CCL23;CCL27;CCL28;CCL3;CCL3L1;CCL4;CCL5;CCL7;CCR1;CCR10;CCR2;CCR3;CCR4;CCR5;CCR6;CCR7;CCR8;CCR9;CCRL2;CGA;CHRM4;CHRM5;CNR1;CX3CR1;CXCL1;CXCL10;CXCL11;CXCL12;CXCL13;CXCL2;CXCL3;CXCL5;CXCL6;CXCL9;CXCR1;CXCR2;CXCR3;CXCR4;CXCR5;CXCR6;CYSLTR1;CYSLTR2;DRD…
Neuroactive ligand-receptor interaction	KEGG_2019_Human	100	2	10C3_CNV_1;5A11_CNV_3	ADCYAP1R1;ADORA1;ADORA2A;ADRA1A;ADRA1B;ADRA1D;ADRA2A;ADRA2B;ADRA2C;ADRB1;ADRB2;ADRB3;AGT;AGTR1;APLN;APLNR;AVPR1B;AVPR2;BRS3;C3AR1;C5;C5AR1;CALCR;CALCRL;CCKAR;CGA;CHRM1;CHRM2;CHRM5;CHRNA1;CHRNA2;CHRNA4;CHRNA6;CHRNA7;CHRNB3;CHRND;CHRNG;CNR1;CNR2;CORT;CRH;CRHR2;CYSLTR2;DRD2;DRD3;DRD5;EDN1;EDNRA;F2;FPR1;FPR2;FPR3;GABBR1;GABBR2;GABRA1;GABRA2;GABRA4;GABRA5;GABRA6;GABRB1;GABRB2;GABRB3;GABRD;GABRE;GABRG1…
transmitter-gated ion channel activity (GO:0022824)	GO_Molecular_Function_2018	101	2	5A11_CNV_3;NM4a3_LowPass_3	GABRA1;GABRA2;GABRA3;GABRA4;GABRA5;GABRA6;GABRB1;GABRB3;GABRE;GABRG1;GABRG2;GABRG3;GLRA3;GRIA1;GRIA2;GRIA3;GRIA4;GRID1;GRID2;GRIK2;GRIK4;GRIK5;GRIN2D;HTR3A;HTR3B;HTR3C;HTR3D;HTR3E;ZACN
Pentose and glucuronate interconversions	KEGG_2019_Human	101	2	16B3b_CNV_4;NM6b1_LowPass_2	CRYL1;DCXR;ISPD;KL;RPEL1;SORD;UGDH;UGP2;UGT2A1;UGT2A2;UGT2A3;UGT2B10;UGT2B11;UGT2B15;UGT2B17;UGT2B28;UGT2B4;UGT2B7;XYLB
transmitter-gated ion channel activity involved in regulation of postsynaptic membrane potential (GO:1904315)	GO_Molecular_Function_2018	106	2	5A3_CNV_2;NM4a3_LowPass_3	CHRNA2;CHRNA6;CHRNA7;CHRNA9;CHRNB1;CHRNB3;CHRND;CHRNE;CHRNG;GABRA1;GABRA2;GABRA3;GABRA4;GABRA5;GABRA6;GABRE;GABRG1;GABRG2;GABRG3;GRIA1;GRIA2;GRIA3;GRID2;GRIK1;GRIK5
Beta defensins_Homo sapiens_R-HSA-1461957	Reactome_2016	107	2	5A11_CNV_3;NM4a4_LowPass_3	CCR6;DEFB1;DEFB103A;DEFB104A;DEFB105A;DEFB106A;DEFB107A;DEFB108B;DEFB110;DEFB112;DEFB113;DEFB114;DEFB115;DEFB116;DEFB118;DEFB119;DEFB121;DEFB123;DEFB124;DEFB125;DEFB127;DEFB129;DEFB130;DEFB131;DEFB132;DEFB133;DEFB134;DEFB135;DEFB136;DEFB4A;TLR1;TLR2
Nicotine addiction	KEGG_2019_Human	110	2	5A11_CNV_3;NM4a3_LowPass_3	CACNA1B;CHRNA4;CHRNA6;CHRNA7;GABRA1;GABRA2;GABRA3;GABRA4;GABRA5;GABRA6;GABRB1;GABRB2;GABRB3;GABRD;GABRE;GABRG1;GABRG2;GABRG3;GABRP;GABRQ;GABRR2;GRIA1;GRIA2;GRIA3;GRIA4;GRIN1;GRIN2B;GRIN2C;GRIN2D;GRIN3A;GRIN3B;SLC17A7;SLC32A1
calcium-dependent cell-cell adhesion via plasma membrane cell adhesion molecules (GO:0016339)	GO_Biological_Process_2018	114	2	10B14_CNV_1;7C5_CNV_4	ATP2C1;CDH1;CDH10;CDH12;CDH15;CDH17;CDH18;CDH19;CDH2;CDH22;CDH23;CDH26;CDH3;CDH4;CDH6;CDH7;CDH8;CDH9;DSG1;NLGN1;PCDHB10;PCDHB11;PCDHB13;PCDHB14;PCDHB16;PCDHB2;PCDHB3;PCDHB4;PCDHB5;PCDHB6;PCDHGB4;PCDHGC3
Porphyrin and chlorophyll metabolism	KEGG_2019_Human	114	2	NM6b1_LowPass_2;NM6b3_LowPass_2	ALAD;BLVRB;COX10;CPOX;FXN;MMAB;PPOX;UGT2A1;UGT2A2;UGT2A3;UGT2B10;UGT2B11;UGT2B15;UGT2B17;UGT2B28;UGT2B4;UGT2B7
Amine ligand-binding receptors_Homo sapiens_R-HSA-375280	Reactome_2016	115	2	10C3_CNV_1;NM6b2_LowPass_2	ADRA1A;ADRA1B;ADRB2;CHRM2;CHRM5;DRD1;DRD2;DRD5;GPR143;HRH2;HRH3;HTR1D;HTR1E;HTR1F;HTR2A;HTR2B;HTR4;HTR5A;HTR6;HTR7;TAAR1;TAAR2;TAAR5;TAAR6;TAAR8
ERCC6 (CSB) and EHMT2 (G9a) positively regulate rRNA expression_Homo sapiens_R-HSA-427389	Reactome_2016	115	2	10B18_CNV_3;10C3_CNV_1	CBX3;CHD4;EHMT2;H2AFX;H2AFZ;H3F3A;HIST1H2AB;HIST1H2AC;HIST1H2AD;HIST1H2AJ;HIST1H2BA;HIST1H2BB;HIST1H2BC;HIST1H2BD;HIST1H2BH;HIST1H2BK;HIST1H2BL;HIST1H2BM;HIST1H2BN;HIST1H2BO;HIST1H3A;HIST1H4A;HIST3H2BB;TTF1
RMTs methylate histone arginines_Homo sapiens_R-HSA-3214858	Reactome_2016	119	2	10B18_CNV_3;10C3_CNV_1	ACTL6A;ARID2;CCND1;CDK4;COPRS;H2AFX;H2AFZ;HIST1H2AA;HIST1H2AB;HIST1H2AC;HIST1H2AD;HIST1H2AG;HIST1H2AH;HIST1H2AJ;HIST1H3A;HIST1H4A;HIST3H2A;JAK2;PBRM1;SMARCA2;SMARCB1;SMARCC1;SMARCC2;SMARCD1;SMARCD3;SMARCE1;WDR5
Ether lipid metabolism	KEGG_2019_Human	122	2	10C5_CNV_1;NM6b1_LowPass_2	GAL3ST1;JMJD7-PLA2G4B;LPCAT2;LPCAT4;PAFAH1B3;PAFAH2;PLA2G12A;PLA2G2A;PLA2G2C;PLA2G2D;PLA2G2E;PLA2G2F;PLA2G3;PLA2G4A;PLA2G4B;PLA2G4C;PLA2G4D;PLA2G4E;PLA2G4F;PLA2G5;PLB1;PLD3
Intestinal immune network for IgA production	KEGG_2019_Human	123	2	10B18_CNV_3;5A3_CNV_2	AICDA;CCL28;CCR10;CCR9;CD28;CD40LG;CD80;CD86;CXCR4;HLA-DMA;HLA-DMB;HLA-DOA;HLA-DOB;HLA-DPA1;HLA-DPB1;HLA-DQA1;HLA-DQA2;HLA-DQB1;HLA-DRA;HLA-DRB1;HLA-DRB5;ICOS;IL15;IL2;IL4;IL5;IL6;ITGB7;LTBR;TGFB1;TNFRSF13C;TNFSF13;TNFSF13B
Meiotic recombination_Homo sapiens_R-HSA-912446	Reactome_2016	135	2	10B18_CNV_3;10C3_CNV_1	ATM;BRCA1;BRCA2;CDK2;CDK4;DMC1;H2AFX;H2AFZ;H3F3A;HIST1H2AB;HIST1H2AC;HIST1H2AD;HIST1H2AJ;HIST1H2BA;HIST1H2BB;HIST1H2BC;HIST1H2BD;HIST1H2BH;HIST1H2BK;HIST1H2BL;HIST1H2BM;HIST1H2BN;HIST1H2BO;HIST1H3A;HIST1H4A;HIST3H2BB;HIST3H3;MLH1;MLH3;MND1;MSH5;PSMC3IP;RAD50;TEX15
ER to Golgi transport vesicle membrane (GO:0012507)	GO_Cellular_Component_2018	136	2	10B18_CNV_3;10C3_CNV_1	CD74;CNIH3;FOLR1;GOSR2;HFE;HLA-A;HLA-B;HLA-C;HLA-DPA1;HLA-DPB1;HLA-DQA1;HLA-DQA2;HLA-DQB1;HLA-DQB2;HLA-DRA;HLA-DRB1;HLA-DRB5;HLA-E;HLA-F;HLA-G;LMAN1;PDCD6;SAR1B;SEC16A;SEC24A;TMED10;TMED7;VTI1A;VTI1B
Meiotic synapsis_Homo sapiens_R-HSA-1221632	Reactome_2016	138	2	10B18_CNV_3;10C3_CNV_1	ACD;ATR;BRCA1;H2AFX;H2AFZ;HIST1H2AB;HIST1H2AC;HIST1H2AD;HIST1H2AJ;HIST1H2BA;HIST1H2BB;HIST1H2BC;HIST1H2BD;HIST1H2BH;HIST1H2BK;HIST1H2BL;HIST1H2BM;HIST1H2BN;HIST1H2BO;HIST1H4A;HIST3H2BB;HIST3H3;HSPA2;LMNB1;SMC1B;SMC3;STAG1;STAG2;SUN2;SYCE2;SYNE2;TERF2IP;TEX12
B-WICH complex positively regulates rRNA expression_Homo sapiens_R-HSA-5250924	Reactome_2016	139	2	10B18_CNV_3;10C3_CNV_1	DEK;EP300;GSK3B;H2AFX;H2AFZ;H3F3A;HIST1H2AB;HIST1H2AC;HIST1H2AD;HIST1H2AJ;HIST1H2BA;HIST1H2BB;HIST1H2BC;HIST1H2BD;HIST1H2BH;HIST1H2BK;HIST1H2BL;HIST1H2BM;HIST1H2BN;HIST1H2BO;HIST1H3A;HIST1H4A;HIST3H2BB;KAT2A;POLR1B;POLR1C;POLR1D;POLR1E;POLR2F;POLR2H;SMARCA5;TAF1A;ZNRD1
Formation of the beta-catenin:TCF transactivating complex_Homo sapiens_R-HSA-201722	Reactome_2016	139	2	10B18_CNV_3;10C3_CNV_1	BCL9L;CDC73;CTNNB1;EP300;H2AFX;H2AFZ;H3F3A;HIST1H2AB;HIST1H2AC;HIST1H2AD;HIST1H2AJ;HIST1H2BA;HIST1H2BB;HIST1H2BC;HIST1H2BD;HIST1H2BH;HIST1H2BK;HIST1H2BL;HIST1H2BM;HIST1H2BN;HIST1H2BO;HIST1H3A;HIST1H4A;HIST3H2BB;HIST3H3;KMT2D;LEO1;RUVBL1;TCF7;TCF7L2;TERT;TLE4
Viral myocarditis	KEGG_2019_Human	140	2	10B18_CNV_3;10C3_CNV_1	ABL1;ABL2;ACTG1;BID;CASP9;CCND1;CD28;CD40LG;CD80;CD86;CXADR;CYCS;DAG1;DMD;EIF4G1;HLA-A;HLA-B;HLA-C;HLA-DMA;HLA-DMB;HLA-DOA;HLA-DOB;HLA-DPA1;HLA-DPB1;HLA-DQA1;HLA-DQA2;HLA-DQB1;HLA-DRA;HLA-DRB1;HLA-DRB5;HLA-E;HLA-F;HLA-G;RAC3;SGCA;SGCG
nuclease activity (GO:0004518)	GO_Molecular_Function_2018	142	2	NM7a6_LowPass_3;NM7a7_LowPass_3	ANG;APEX1;DFFB;RNASE1;RNASE10;RNASE11;RNASE12;RNASE13;RNASE2;RNASE3;RNASE4;RNASE6;RNASE7;RNASE8;RNASE9
HDACs deacetylate histones_Homo sapiens_R-HSA-3214815	Reactome_2016	142	2	10C3_CNV_1;5A12_CNV_3	ARID4B;BRMS1;GATAD2A;GATAD2B;HDAC10;HDAC3;HDAC8;HIST1H2AA;HIST1H2AB;HIST1H2AC;HIST1H2AD;HIST1H2AG;HIST1H2AH;HIST1H2AJ;HIST1H2BA;HIST1H2BB;HIST1H2BC;HIST1H2BD;HIST1H2BH;HIST1H2BK;HIST1H2BL;HIST1H2BM;HIST1H2BN;HIST1H2BO;HIST1H3A;HIST1H4A;HIST2H2AA3;HIST2H2AB;HIST2H2AC;HIST2H2BE;HIST2H2BF;HIST2H3A;HIST3H2A;HIST3H2BB;HMG20B;MBD3;MTA2;PHF21A;RBBP7;SAP18;SAP30;SAP30L;TBL1X
Cytokine Signaling in Immune system_Homo sapiens_R-HSA-1280215	Reactome_2016	145	2	10C3_CNV_1;10C5_CNV_1	AAAS;ANGPT1;ARAF;ARRB1;BLNK;BRAF;BTC;CASP1;CD40LG;CISH;CNTFR;CSF2;CSF3R;CUL1;DDX58;DUSP1;DUSP2;DUSP4;DUSP6;DUSP7;EDAR;EGF;EIF4A3;EIF4E2;EIF4E3;EIF4G3;ERBB3;FBXW11;FGF10;FGF17;FGF18;FGF19;FGF3;FGF4;FGF5;FGFR4;GBP1;GBP2;GBP3;GBP4;GBP5;GBP6;GBP7;GDNF;GHR;GRB2;GRIN2C;HLA-A;HLA-B;HLA-C;HLA-DQA1;HLA-DQB1;HLA-DRA;HLA-DRB1;HLA-DRB5;HLA-E;HLA-F;HLA-G;IFIT1;IFIT2;IFIT3;IFNA1;IFNA10;IFNA14;IFNA16;IFNA17;IFN…
Arachidonic acid metabolism	KEGG_2019_Human	146	2	10C5_CNV_1;NM6b2_LowPass_2	ALOX12;ALOX12B;ALOX15;ALOX15B;CBR1;CBR3;CYP2U1;CYP4A11;CYP4A22;GGT1;GGT5;GPX2;GPX3;LTC4S;PLA2G12A;PLA2G16;PLA2G2A;PLA2G2C;PLA2G2D;PLA2G2E;PLA2G2F;PLA2G3;PLA2G4A;PLA2G5;PLA2G6;PTGES;PTGES2;PTGS2;TBXAS1
Retinol metabolism	KEGG_2019_Human	151	2	NM6b1_LowPass_2;NM6b3_LowPass_2	ADH1A;ADH1B;ADH4;ADH5;ADH6;ADH7;ALDH1A1;ALDH1A2;CYP1A1;CYP1A2;CYP26B1;CYP2A6;CYP2B6;CYP2S1;DHRS4;DHRS4L2;HSD17B6;LRAT;RDH10;RDH16;RDH5;RETSAT;SDR16C5;UGT2A1;UGT2A2;UGT2A3;UGT2B10;UGT2B11;UGT2B15;UGT2B17;UGT2B28;UGT2B4;UGT2B7
Staphylococcus aureus infection	KEGG_2019_Human	152	2	NM3a2_LowPass_2;NM4a4_LowPass_3	C1QA;C1QB;C1QC;C3;CFD;DEFA1;DEFA1B;DEFA3;DEFA4;DEFA5;DEFA6;DEFB1;DEFB103A;DEFB103B;DEFB4A;DEFB4B;FCGR2A;FCGR2B;FCGR3A;FCGR3B;PTAFR
ligand-gated ion channel activity (GO:0015276)	GO_Molecular_Function_2018	153	2	5A3_CNV_2;NM4a3_LowPass_3	ANXA6;CHRFAM7A;CHRNA10;CHRNA2;CHRNA6;CHRNA7;CHRNA9;CHRNB1;CHRNB3;CHRND;CHRNE;CHRNG;CNGB1;DLG1;DLG3;DLG4;GABRA1;GABRA2;GABRA3;GABRA4;GABRA5;GABRA6;GABRB1;GABRB2;GABRB3;GABRE;GABRG1;GABRG2;GABRG3;GABRP;GABRQ;GLRA1;GLRA4;GLRB;GRIK1;GRIK5;HTR3C;HTR3D;HTR3E;NCALD;P2RX1;P2RX5;P2RX6;TRPV1
NoRC negatively regulates rRNA expression_Homo sapiens_R-HSA-427413	Reactome_2016	159	2	10B18_CNV_3;10C3_CNV_1	BAZ2A;CCNH;ERCC3;GTF2H4;H2AFX;H2AFZ;H3F3A;HIST1H2AB;HIST1H2AC;HIST1H2AD;HIST1H2AJ;HIST1H2BA;HIST1H2BB;HIST1H2BC;HIST1H2BD;HIST1H2BH;HIST1H2BK;HIST1H2BL;HIST1H2BM;HIST1H2BN;HIST1H2BO;HIST1H3A;HIST1H4A;HIST3H2BB;MNAT1;POLR1B;POLR1C;POLR1D;POLR1E;POLR2F;POLR2H;SAP130;SAP18;SAP30;SAP30BP;SIN3B;SMARCA5;TAF1A;TTF1;UBTF;ZNRD1
Positive epigenetic regulation of rRNA expression_Homo sapiens_R-HSA-5250913	Reactome_2016	159	2	10B18_CNV_3;10C3_CNV_1	CBX3;CHD4;DEK;EHMT2;EP300;GSK3B;H2AFX;H2AFZ;H3F3A;HIST1H2AB;HIST1H2AC;HIST1H2AD;HIST1H2AJ;HIST1H2BA;HIST1H2BB;HIST1H2BC;HIST1H2BD;HIST1H2BH;HIST1H2BK;HIST1H2BL;HIST1H2BM;HIST1H2BN;HIST1H2BO;HIST1H3A;HIST1H4A;HIST3H2BB;KAT2A;POLR1B;POLR1C;POLR1D;POLR1E;POLR2F;POLR2H;SMARCA5;TAF1A;TTF1;ZNRD1
Negative epigenetic regulation of rRNA expression_Homo sapiens_R-HSA-5250941	Reactome_2016	162	2	10B18_CNV_3;10C3_CNV_1	BAZ2A;CCNH;ERCC3;GTF2H4;H2AFX;H2AFZ;H3F3A;HIST1H2AB;HIST1H2AC;HIST1H2AD;HIST1H2AJ;HIST1H2BA;HIST1H2BB;HIST1H2BC;HIST1H2BD;HIST1H2BH;HIST1H2BK;HIST1H2BL;HIST1H2BM;HIST1H2BN;HIST1H2BO;HIST1H3A;HIST1H4A;HIST3H2BB;MNAT1;POLR1B;POLR1C;POLR1D;POLR1E;POLR2F;POLR2H;SAP130;SAP18;SAP30;SAP30BP;SIN3B;SMARCA5;TAF1A;TTF1;UBTF;ZNRD1
RNA Polymerase I Promoter Clearance_Homo sapiens_R-HSA-73854	Reactome_2016	162	2	10B18_CNV_3;10C3_CNV_1	CCNH;CHD4;EHMT2;ERCC3;GTF2H4;H2AFX;H2AFZ;H3F3A;HIST1H2AB;HIST1H2AC;HIST1H2AD;HIST1H2AJ;HIST1H2BA;HIST1H2BB;HIST1H2BC;HIST1H2BD;HIST1H2BH;HIST1H2BK;HIST1H2BL;HIST1H2BM;HIST1H2BN;HIST1H2BO;HIST1H3A;HIST1H4A;HIST3H2BB;KAT2A;MNAT1;POLR1B;POLR1C;POLR1D;POLR1E;POLR2F;POLR2H;TAF1A;TTF1;UBTF;ZNRD1
Antigen processing and presentation	KEGG_2019_Human	163	2	10B18_CNV_3;5A3_CNV_2	B2M;CALR;CANX;CD4;CD74;CREB1;CTSL;HLA-A;HLA-B;HLA-C;HLA-DMA;HLA-DMB;HLA-DOA;HLA-DOB;HLA-DPA1;HLA-DPB1;HLA-DQA1;HLA-DQA2;HLA-DQB1;HLA-DRA;HLA-DRB1;HLA-DRB5;HLA-E;HLA-F;HLA-G;HSPA1A;HSPA1B;HSPA1L;HSPA2;HSPA4;HSPA5;HSPA8;IFI30;KLRC1;KLRC2;KLRC3;KLRC4;KLRD1;NFYA;PDIA3;PSME3;RFXANK;TAP1;TAP2;TAPBP;TNF
Developmental Biology_Homo sapiens_R-HSA-1266738	Reactome_2016	165	2	10B18_CNV_3;5A3_CNV_2	ABL1;ABL2;ABLIM1;ABLIM2;ABLIM3;ACTR3;ACVR1B;ACVR1C;ACVR2B;ADAM11;ADAM23;ADIPOQ;AGAP2;AKT2;AKT3;ALCAM;ANGPT1;ANK1;ANK2;AP2A2;AP2B1;AP2M1;AP2S1;ARHGAP35;ARHGAP39;ARHGEF12;ARHGEF7;ARPC2;ARPC4;ARRB2;ASH2L;BOC;CACNA1C;CACNA1D;CACNA1G;CACNA1I;CACNA1S;CACNB1;CACNB3;CACNG2;CAMK2A;CAMK2D;CAP2;CCND3;CD72;CDK4;CDK5R1;CDK8;CDX2;CEBPA;CEBPD;CFC1;CFL1;CHL1;CLASP1;CLASP2;CLTA;CLTB;CLTCL1;CNKSR2;CNOT6;CNTN1;CNTN…
RNA Polymerase I Transcription_Homo sapiens_R-HSA-73864	Reactome_2016	166	2	10B18_CNV_3;10C3_CNV_1	CBX3;CCNH;CHD4;EHMT2;ERCC3;GTF2H4;H2AFX;H2AFZ;H3F3A;HIST1H2AB;HIST1H2AC;HIST1H2AD;HIST1H2AJ;HIST1H2BA;HIST1H2BB;HIST1H2BC;HIST1H2BD;HIST1H2BH;HIST1H2BK;HIST1H2BL;HIST1H2BM;HIST1H2BN;HIST1H2BO;HIST1H3A;HIST1H4A;HIST3H2BB;KAT2A;MNAT1;POLR1B;POLR1C;POLR1D;POLR1E;POLR2F;POLR2H;PTRF;TAF1A;TTF1;UBTF;ZNRD1
Digestion of dietary carbohydrate_Homo sapiens_R-HSA-189085	Reactome_2016	167	2	10B9_CNV_3;10C5_CNV_1	AMY1A;AMY1B;AMY2A;AMY2B;LCT;MGAM;SI;TREH
nucleosome organization (GO:0034728)	GO_Biological_Process_2018	168	2	10B18_CNV_3;10C3_CNV_1	ANP32B;ARID2;BRD2;CHAF1B;CTCF;DAXX;H1FOO;H2AFX;H2AFY;H3F3A;H3F3C;HIST1H2BA;HIST1H2BB;HIST1H2BC;HIST1H2BD;HIST1H2BH;HIST1H2BK;HIST1H2BL;HIST1H2BM;HIST1H2BN;HIST1H2BO;HIST1H3A;HIST1H4A;HIST1H4G;HIST3H2A;HIST3H2BB;HIST3H3;HMGA1;HMGB2;NFE2;PADI4;PBRM1;RNF8;SET;SETD2;SMARCA5;SMARCB1;SMARCC1;SMARCC2;SMARCD1;SMARCD3;SMARCE1;SOX9
negative regulation of transcription, DNA-templated (GO:0045892)	GO_Biological_Process_2018	171	2	10B13_CNV_3;NM4b1_LowPass_4	ADIPOQ;AEBP1;AES;AHR;ALX1;ARHGAP35;ARID5A;ARID5B;ATF5;ATF7IP;ATOH8;ATP8B1;ATXN1;AURKB;BACH1;BCL11A;BCL6;BCOR;BEND5;BHLHE40;BHLHE41;BIRC5;BMI1;BMP2;BMP6;BMP7;BPTF;BRCA1;BTRC;C1QBP;CALR;CBFA2T2;CBFA2T3;CBX2;CBX4;CBX6;CBX7;CBX8;CBY1;CC2D1A;CC2D1B;CCAR2;CD38;CDK5R1;CDKN1B;CDKN2A;CDX2;CEBPA;CHMP1A;CIPC;CIR1;CNOT7;COMMD7;CREB1;CREBBP;CREM;CTBP1;CTBP2;CTNNB1;DAB2IP;DACH1;DAP;DDX20;DDX5;DEPDC1;DICER1;DLX…
positive regulation of transcription from RNA polymerase II promoter (GO:0045944)	GO_Biological_Process_2018	175	2	NM4b1_LowPass_4;NM4b4_LowPass_4	AATF;ABRA;ACVRL1;AHR;AHRR;AKAP8L;ALX1;ARF4;ARNTL2;ATF1;ATF3;ATF4;ATF5;BCL11B;BCL2L12;BMP4;BMP6;BRCA1;BRD4;CAPRIN2;CCDC62;CCNK;CDH13;CDK12;CDK7;CDK8;CDKN2B;CDX1;CEBPA;CEBPB;CEBPE;CEBPG;CHCHD2;CITED4;CKAP2;CLOCK;COPS5;CREB3L4;CREBRF;CRLF3;CRTC1;CRTC2;CRTC3;CRX;CSF3;CSRNP2;CTBP2;DBP;DDIT3;DDRGK1;DDX17;DLL1;DMRT1;DUX4;E2F7;EAPP;EBF3;EBF4;ECD;EFCAB7;EGFR;EHF;ELF1;ELL;EP300;ERG;ETV4;FGFR2;FLCN;FOXA1;FO…
Meiosis_Homo sapiens_R-HSA-1500620	Reactome_2016	176	2	10B18_CNV_3;10C3_CNV_1	ACD;ATM;ATR;BRCA1;BRCA2;CDK2;CDK4;DMC1;H2AFX;H2AFZ;H3F3A;HIST1H2AB;HIST1H2AC;HIST1H2AD;HIST1H2AJ;HIST1H2BA;HIST1H2BB;HIST1H2BC;HIST1H2BD;HIST1H2BH;HIST1H2BK;HIST1H2BL;HIST1H2BM;HIST1H2BN;HIST1H2BO;HIST1H3A;HIST1H4A;HIST3H2BB;HIST3H3;HSPA2;LMNB1;MLH1;MLH3;MND1;MSH5;PSMC3IP;RAD50;SMC1B;SMC3;STAG1;STAG2;SUN2;SYCE2;SYNE2;TERF2IP;TEX12;TEX15
DNA cytosine deamination (GO:0070383)	GO_Biological_Process_2018	179	2	NM4b1_LowPass_4;NM4b4_LowPass_4	APOBEC3A;APOBEC3C;APOBEC3D;APOBEC3F;APOBEC3G;APOBEC3H;CDADC1
Oxidative Stress Induced Senescence_Homo sapiens_R-HSA-2559580	Reactome_2016	180	2	10B18_CNV_3;10C3_CNV_1	AGO1;AGO3;AGO4;CBX2;CBX4;CBX6;CBX8;CDK4;CDKN2A;CDKN2B;E2F3;EZH2;FOS;H2AFX;H2AFZ;H3F3A;HIST1H2AB;HIST1H2AC;HIST1H2AD;HIST1H2AJ;HIST1H2BA;HIST1H2BB;HIST1H2BC;HIST1H2BD;HIST1H2BH;HIST1H2BK;HIST1H2BL;HIST1H2BM;HIST1H2BN;HIST1H2BO;HIST1H3A;HIST1H4A;HIST3H2BB;IFNB1;MAP2K6;MAP3K5;MAPK1;MAPK11;MAPK14;MAPKAPK3;PHC3;RING1;SUZ12;TFDP1;TNIK;TNRC6B;TNRC6C;TXN;UBA52
Pancreatic secretion	KEGG_2019_Human	186	2	10B10_CNV_2;10C5_CNV_1	ADCY5;AMY2A;AMY2B;ATP1B3;ATP2B1;CELA2A;CELA2B;CELA3A;CELA3B;CLCA1;CLCA2;CLCA4;CPA3;CPB1;CPB2;PLA2G12A;PLA2G2A;PLA2G2C;PLA2G2D;PLA2G2E;PLA2G2F;PLA2G3;PLA2G5;PRSS1;SCTR;SLC9A1;TRPC1

## Sheet: Sheet 1 (2)
enriched GO biological process term	total genes in pathway	CTC number	Genes
eosinophil chemotaxis (GO:0048245)	82	13	CCL1;CCL11;CCL13;CCL14;CCL15;CCL16;CCL18;CCL2;CCL23;CCL24;CCL26;CCL3;CCL3L1;CCL4;CCL4L1;CCL5;CCL7;CCL8;CX3CL1;LGALS3;SCG2;XCL1;XCL2
eosinophil migration (GO:0072677)	82	13	CCL1;CCL11;CCL13;CCL14;CCL15;CCL16;CCL18;CCL2;CCL23;CCL24;CCL26;CCL3;CCL3L1;CCL4;CCL4L1;CCL5;CCL7;CCL8;CX3CL1;LGALS3;SCG2;XCL1;XCL2
lymphocyte activation involved in immune response (GO:0002285)	74	12	CD1C;CD244;EIF2AK4;F2RL1;GPR183;IFNA1;IFNA10;IFNA14;IFNA16;IFNA17;IFNA2;IFNA21;IFNA4;IFNA5;IFNA6;IFNA7;IFNA8;IFNB1;IFNE;IFNK;IFNW1;LCP1
type I interferon receptor binding (GO:0005132)	47	11	IFNA1;IFNA10;IFNA14;IFNA16;IFNA17;IFNA2;IFNA21;IFNA4;IFNA5;IFNA6;IFNA7;IFNA8;IFNB1;IFNE;IFNK;IFNW1
positive regulation of peptidyl-serine phosphorylation of STAT protein (GO:0033141)	58	11	IFNA1;IFNA10;IFNA14;IFNA16;IFNA17;IFNA2;IFNA21;IFNA4;IFNA5;IFNA6;IFNA7;IFNA8;IFNB1;IFNE;IFNG;IFNK;IFNW1;LIF
regulation of peptidyl-serine phosphorylation of STAT protein (GO:0033139)	58	11	IFNA1;IFNA10;IFNA14;IFNA16;IFNA17;IFNA2;IFNA21;IFNA4;IFNA5;IFNA6;IFNA7;IFNA8;IFNB1;IFNE;IFNG;IFNK;IFNW1;LIF
natural killer cell activation involved in immune response (GO:0002323)	69	11	CORO1A;IFNA1;IFNA10;IFNA14;IFNA16;IFNA17;IFNA2;IFNA21;IFNA4;IFNA5;IFNA6;IFNA7;IFNA8;IFNB1;IFNE;IFNK;IFNW1
response to dsRNA (GO:0043331)	82	11	IFNA1;IFNA10;IFNA14;IFNA16;IFNA17;IFNA2;IFNA21;IFNA4;IFNA5;IFNA6;IFNA7;IFNA8;IFNB1;IFNE;IFNK;IFNW1;PDE12;RFTN1;RIOK3;TICAM1;TLR3
T cell activation involved in immune response (GO:0002286)	87	11	CD1C;EIF2AK4;F2RL1;FCER1G;ICAM1;IFNA1;IFNA10;IFNA14;IFNA16;IFNA17;IFNA2;IFNA21;IFNA4;IFNA5;IFNA6;IFNA7;IFNA8;IFNB1;IFNE;IFNK;IFNW1;ITGAL;LCP1;LILRB1;SLC11A1;TNFSF18
B cell proliferation (GO:0042100)	92	11	CD40LG;CD79A;CR2;CTPS1;GAPT;HSPD1;IFNA1;IFNA10;IFNA14;IFNA16;IFNA17;IFNA2;IFNA21;IFNA4;IFNA5;IFNA6;IFNA7;IFNA8;IFNB1;IFNE;IFNK;IFNW1;IL10;LEF1;MEF2C;MS4A1;PTPRC
lymphocyte proliferation (GO:0046651)	106	11	CD40LG;CD79A;CR2;CTPS1;ELF4;FLT3;HELLS;HSPD1;IFNA1;IFNA10;IFNA14;IFNA16;IFNA17;IFNA2;IFNA21;IFNA4;IFNA5;IFNA6;IFNA7;IFNA8;IFNB1;IFNE;IFNK;IFNW1;IL10;LEF1;MEF2C;MS4A1;MSN;PIK3CG;PPP3CB;PTPRC;TNFRSF4;TNFSF14
Herpes simplex virus 1 infection	125	11	AKT1;AKT2;AKT3;APAF1;B2M;BAD;BAK1;BAX;BCL2;BCL2L1;BID;BIRC2;BIRC3;BST2;C3;C5;CALR;CARD9;CASP3;CASP8;CCL2;CCL5;CD74;CFP;CHUK;DAXX;DDX58;EIF2AK2;EIF2AK3;EIF2AK4;EIF2B1;EIF2B2;EIF2B3;EIF2B4;EIF2B5;EIF2S1;EIF4EBP1;FADD;FASLG;HCFC1;HKR1;HLA-A;HLA-B;HLA-C;HLA-DMA;HLA-DMB;HLA-DOA;HLA-DOB;HLA-DPA1;HLA-DPB1;HLA-DQA1;HLA-DQA2;HLA-DQB1;HLA-DRA;HLA-DRB1;HLA-DRB5;HLA-E;HLA-F;HLA-G;IFIH1;IFNA1;IFNA10;IFNA13;IF…
Cytokine-cytokine receptor interaction	91	10	ACKR3;ACKR4;ACVR1;ACVR1B;ACVR1C;ACVR2A;ACVR2B;ACVRL1;AMH;AMHR2;BMP10;BMP15;BMP2;BMP3;BMP4;BMP5;BMP6;BMP7;BMPR1A;BMPR1B;BMPR2;CCL1;CCL11;CCL13;CCL14;CCL15;CCL16;CCL18;CCL19;CCL2;CCL20;CCL21;CCL23;CCL24;CCL25;CCL26;CCL27;CCL28;CCL3;CCL3L1;CCL3L3;CCL4;CCL4L1;CCL4L2;CCL5;CCL7;CCL8;CCR1;CCR10;CCR2;CCR3;CCR4;CCR5;CCR6;CCR7;CCR8;CCR9;CD27;CD4;CD40LG;CD70;CLCF1;CNTF;CNTFR;CRLF2;CSF1R;CSF2;CSF2RA;CSF2RB;C…
olfactory receptor activity (GO:0004984)	94	10	OR10A2;OR10A3;OR10A4;OR10A5;OR10A6;OR10A7;OR10AD1;OR10AG1;OR10C1;OR10G4;OR10G7;OR10G8;OR10G9;OR10P1;OR10Q1;OR10S1;OR10V1;OR10W1;OR11L1;OR13A1;OR13C2;OR13C3;OR13C4;OR13C5;OR13C8;OR13C9;OR13D1;OR13H1;OR13J1;OR14A16;OR14C36;OR14I1;OR14J1;OR1A1;OR1A2;OR1B1;OR1C1;OR1D2;OR1D5;OR1E1;OR1F1;OR1J1;OR1J2;OR1J4;OR1K1;OR1L1;OR1L3;OR1L4;OR1L6;OR1L8;OR1M1;OR1Q1;OR2A1;OR2A12;OR2A14;OR2A2;OR2A5;OR2AE1;OR2AG1;OR2A…
response to exogenous dsRNA (GO:0043330)	101	10	CAV1;COLEC12;DDX58;FLOT1;IFIH1;IFIT1;IFNA1;IFNA10;IFNA14;IFNA16;IFNA17;IFNA2;IFNA21;IFNA4;IFNA5;IFNA6;IFNA7;IFNA8;IFNB1;IFNE;IFNK;IFNW1;MAVS;MUL1;PQBP1;RALB;RFTN1;TICAM1;TLR3
TRAF6 mediated IRF7 activation_Homo sapiens_R-HSA-933541	95	9	CREBBP;DDX58;DHX36;EP300;IFIH1;IFNA1;IFNA10;IFNA14;IFNA16;IFNA17;IFNA2;IFNA21;IFNA4;IFNA5;IFNA6;IFNA7;IFNA8;IFNB1;IKBKE;IRF1;IRF2;IRF3;IRF7;MAVS;MYD88;RNF135;SIKE1;TANK;TRAF2;TRAF6
CCR chemokine receptor binding (GO:0048020)	108	9	CCL1;CCL11;CCL13;CCL14;CCL15;CCL16;CCL17;CCL18;CCL19;CCL2;CCL20;CCL21;CCL22;CCL23;CCL24;CCL25;CCL26;CCL27;CCL3;CCL3L1;CCL4;CCL4L1;CCL5;CCL7;CCL8;CCR2;CCRL2;CNIH4;CX3CL1;CXCL13;DEFB1;DEFB103A;DEFB106A;DEFB4A;XCL1;XCL2
Olfactory Signaling Pathway_Homo sapiens_R-HSA-381753	112	9	GNAL;GNGT1;OR10A2;OR10A3;OR10A4;OR10A5;OR10A6;OR10A7;OR10AD1;OR10AG1;OR10C1;OR10G4;OR10G7;OR10G8;OR10G9;OR10H1;OR10H2;OR10H3;OR10H4;OR10H5;OR10J1;OR10J3;OR10J5;OR10K1;OR10K2;OR10P1;OR10Q1;OR10R2;OR10S1;OR10T2;OR10V1;OR10W1;OR10X1;OR10Z1;OR11A1;OR11H1;OR11L1;OR12D2;OR12D3;OR13A1;OR13C2;OR13C3;OR13C4;OR13C5;OR13C8;OR13C9;OR13D1;OR13G1;OR13H1;OR13J1;OR14A16;OR14C36;OR14I1;OR14J1;OR1A1;OR1A2;OR1B1;OR…
Olfactory transduction	117	9	ADCY3;ANO2;ARRB1;ARRB2;CALM1;CALM2;CALM3;CALML3;CALML4;CALML5;CAMK2A;CAMK2B;CAMK2D;CAMK2G;CNGA2;CNGA3;CNGA4;CNGB1;GNAL;GNG13;GNG7;GUCY2D;NCALD;OR10A2;OR10A3;OR10A4;OR10A5;OR10A6;OR10A7;OR10AD1;OR10AG1;OR10C1;OR10G4;OR10G7;OR10G8;OR10G9;OR10H1;OR10H2;OR10H3;OR10H4;OR10H5;OR10J1;OR10J3;OR10J5;OR10K1;OR10K2;OR10P1;OR10Q1;OR10R2;OR10S1;OR10T2;OR10V1;OR10W1;OR10X1;OR10Z1;OR11A1;OR11H1;OR11L1;OR12D2;OR…
Generic Transcription Pathway_Homo sapiens_R-HSA-212436	170	9	AGO1;AGO3;AGO4;AIFM2;AKT1;AKT2;APAF1;AR;ARID3A;ATF2;ATM;ATP1B4;ATR;ATRIP;AURKA;AURKB;BANP;BARD1;BAX;BBC3;BCL6;BIRC5;BLM;BNIP3L;BRCA1;BRD1;BRD7;BRIP1;BRPF1;BTG2;CARM1;CASP1;CASP10;CASP2;CASP6;CCNA1;CCNB1;CCNC;CCNE1;CCNE2;CCNG1;CCNH;CCNK;CCNT2;CDC25C;CDK1;CDK12;CDK13;CDK2;CDK5;CDK5R1;CDK7;CDK8;CDK9;CDKN1B;CDKN2A;CDKN2B;CENPJ;CHD3;CHD9;CHEK1;CHM;CNOT1;CNOT10;CNOT11;CNOT2;CNOT3;CNOT4;CNOT6;CNOT6L;CNO…
GPCR downstream signaling_Homo sapiens_R-HSA-388396	187	9	ABHD12;ABHD6;ABR;ACKR3;ADCY1;ADCY2;ADCY3;ADCY5;ADCY6;ADCY7;ADCY8;ADCY9;ADCYAP1;ADCYAP1R1;ADM;ADM2;ADORA1;ADORA2A;ADORA2B;ADORA3;ADRA1A;ADRA1B;ADRA1D;ADRA2A;ADRA2B;ADRA2C;ADRB1;ADRB2;ADRB3;ADRBK1;ADRBK2;AGT;AGTR1;AGTR2;AKAP13;AKT2;AKT3;ANXA1;APLN;APLNR;APP;ARHGAP4;ARHGEF1;ARHGEF11;ARHGEF12;ARHGEF17;ARHGEF18;ARHGEF2;ARHGEF25;ARHGEF3;ARHGEF4;ARHGEF6;ARHGEF7;ARHGEF9;ARRB1;ARRB2;AVP;AVPR1A;AVPR1B;AVPR…
cytokine activity (GO:0005125)	38	8	ADIPOQ;AIMP1;BMP10;BMP15;BMP2;BMP3;BMP4;BMP5;BMP6;BMP7;C5;CCL1;CCL11;CCL13;CCL14;CCL15;CCL16;CCL18;CCL19;CCL2;CCL20;CCL21;CCL23;CCL28;CCL3;CCL3L1;CCL4;CCL4L1;CCL5;CCL7;CCL8;CKLF;CLCF1;CNTF;CSF3;CXCL1;CXCL10;CXCL11;CXCL12;CXCL13;CXCL16;CXCL2;CXCL3;CXCL5;CXCL6;CXCL9;EDN1;EPO;FAM3D;FGF2;GDF10;GDF11;GDF2;GDF6;GDF7;HMGB1;IFNA1;IFNA10;IFNA14;IFNA16;IFNA17;IFNA2;IFNA21;IFNA4;IFNA5;IFNA6;IFNA7;IFNA8;IFNB…
Regulation of IFNA signaling_Homo sapiens_R-HSA-912694	82	8	IFNA1;IFNA10;IFNA14;IFNA16;IFNA17;IFNA2;IFNA21;IFNA4;IFNA5;IFNA6;IFNA7;IFNA8;IFNAR1;IFNAR2;IFNB1;PTPN1;SOCS3;STAT2;TYK2;USP18
natural killer cell activation (GO:0030101)	106	8	BAG6;CD2;ELF4;HNF1A;IFNA1;IFNA10;IFNA14;IFNA16;IFNA17;IFNA2;IFNA21;IFNA4;IFNA5;IFNA6;IFNA7;IFNA8;IFNB1;IFNE;IFNK;IFNW1;IL12B;IL21R;NCR1;NCR3;PIK3CD;PRDX1;SNX27;ULBP1;ULBP2;ULBP3
monocyte chemotaxis (GO:0002548)	114	8	ANXA1;CALCA;CCL1;CCL11;CCL13;CCL14;CCL15;CCL16;CCL17;CCL18;CCL19;CCL2;CCL20;CCL21;CCL22;CCL23;CCL24;CCL25;CCL26;CCL3;CCL3L1;CCL4;CCL4L1;CCL5;CCL7;CCL8;CX3CL1;DEFB104A;FLT1;IL6R;PDGFB;PTPRO;RPS19;S100A12;TNFSF11;XCL1;XCL2
Autoimmune thyroid disease	133	8	CD28;CD40LG;CD80;CD86;CGA;CTLA4;FAS;GZMB;HLA-A;HLA-B;HLA-C;HLA-DMA;HLA-DMB;HLA-DOA;HLA-DOB;HLA-DPA1;HLA-DPB1;HLA-DQA1;HLA-DQA2;HLA-DQB1;HLA-DRA;HLA-DRB1;HLA-DRB5;HLA-E;HLA-F;HLA-G;IFNA1;IFNA10;IFNA13;IFNA14;IFNA16;IFNA17;IFNA2;IFNA21;IFNA4;IFNA5;IFNA6;IFNA7;IFNA8;IL10;IL4;IL5;PRF1;TG;TPO;TSHB;TSHR
Cytosolic DNA-sensing pathway	146	8	AIM2;CASP1;CCL4;CCL4L1;CCL4L2;CCL5;CHUK;CXCL10;DDX58;IFNA1;IFNA10;IFNA13;IFNA14;IFNA16;IFNA17;IFNA2;IFNA21;IFNA4;IFNA5;IFNA6;IFNA7;IFNA8;IFNB1;IKBKE;IL18;IL1B;IL33;IRF3;MAVS;NFKB1;NFKBIA;NFKBIB;POLR1D;POLR2E;POLR2F;POLR2H;POLR2K;POLR3A;POLR3B;POLR3C;POLR3D;POLR3F;POLR3G;POLR3GL;POLR3H;PYCARD;RELA;RIPK1;RIPK3;TREX1;ZBP1
RIG-I-like receptor signaling pathway	155	8	ATG12;ATG5;AZI2;CXCL10;CYLD;DDX58;DHX58;FADD;IFIH1;IFNA1;IFNA10;IFNA13;IFNA14;IFNA16;IFNA17;IFNA2;IFNA21;IFNA4;IFNA5;IFNA6;IFNA7;IFNA8;IFNB1;IFNE;IFNK;IFNW1;IKBKE;IL12A;IL12B;IRF3;MAP3K1;MAP3K7;MAPK9;MAVS;NFKB1;NFKBIA;NFKBIB;NLRX1;RELA;RIPK1;SIKE1;TANK;TBKBP1;TNF;TRAF2;TRAF3;TRAF6
Metallothioneins bind metals_Homo sapiens_R-HSA-5661231	11	7	MT1A;MT1B;MT1E;MT1F;MT1G;MT1H;MT1M;MT1X;MT2A;MT3;MT4
Response to metal ions_Homo sapiens_R-HSA-5660526	11	7	MT1A;MT1B;MT1E;MT1F;MT1G;MT1H;MT1M;MT1X;MT2A;MT3;MT4
Signaling by GPCR_Homo sapiens_R-HSA-372790	20	7	ABHD12;ABHD6;ABR;ACKR2;ACKR3;ACKR4;ACTN2;ADCY1;ADCY2;ADCY3;ADCY5;ADCY6;ADCY7;ADCY8;ADCY9;ADCYAP1;ADCYAP1R1;ADM;ADORA1;ADORA2A;ADORA2B;ADORA3;ADRA1A;ADRA1B;ADRA1D;ADRA2A;ADRA2B;ADRA2C;ADRB1;ADRB2;ADRB3;ADRBK1;ADRBK2;AGT;AGTR1;AGTR2;AHCYL1;AKAP13;AKAP9;AKT2;AKT3;ANGPT1;ANXA1;APBB1IP;APLN;APLNR;APP;ARAF;ARHGAP4;ARHGEF1;ARHGEF11;ARHGEF12;ARHGEF17;ARHGEF18;ARHGEF2;ARHGEF25;ARHGEF3;ARHGEF4;ARHGEF6;ARHG…
Estrogen signaling pathway	27	7	ADCY1;ADCY2;ADCY3;ADCY4;ADCY5;ADCY6;ADCY7;ADCY8;AKT3;ATF2;ATF4;ATF6B;BCL2;CALM1;CALM2;CALM3;CALML3;CALML5;CALML6;CREB1;CREB3;CREB3L1;CREB3L2;CREB3L3;CREB3L4;CTSD;EBAG9;EGFR;ESR1;ESR2;FKBP4;FKBP5;FOS;GABBR1;GABBR2;GNAI1;GNAI2;GNAI3;GNAQ;GRB2;GRM1;HBEGF;HRAS;HSP90B1;HSPA1A;HSPA1B;HSPA1L;HSPA2;HSPA8;ITPR1;ITPR2;ITPR3;JUN;KCNJ3;KCNJ6;KRT10;KRT12;KRT13;KRT14;KRT15;KRT16;KRT17;KRT18;KRT19;KRT20;KRT23;K…
interleukin-1 receptor binding (GO:0005149)	40	7	ERAP1;IL1A;IL1B;IL1F10;IL1RN;IL3;IL36A;IL36B;IL36G;IL36RN;IL37;LRRC70;TLR5;TLR9;TRIP6
Signal Transduction_Homo sapiens_R-HSA-162582	80	7	A2M;AATF;ABCA4;ABHD12;ABHD6;ABI1;ABI2;ABR;ACKR2;ACKR3;ACKR4;ACTB;ACTG1;ACTN2;ACTR2;ACTR3;ACVR1B;ACVR1C;ACVR2A;ACVR2B;ADAM10;ADAM12;ADAM17;ADCY1;ADCY10;ADCY2;ADCY3;ADCY5;ADCY6;ADCY7;ADCY8;ADCY9;ADCYAP1;ADCYAP1R1;ADH1A;ADH4;ADM;ADORA1;ADORA2A;ADORA2B;ADORA3;ADRA1A;ADRA1B;ADRA1D;ADRA2A;ADRA2B;ADRA2C;ADRB1;ADRB2;ADRB3;ADRBK1;ADRBK2;AES;AGO2;AGT;AGTR1;AGTR2;AHCTF1;AHCYL1;AKAP13;AKAP9;AKR1B10;AKR1C1;AK…
taste receptor activity (GO:0008527)	95	7	FFAR4;PKD2L1;TAS1R1;TAS1R2;TAS1R3;TAS2R1;TAS2R10;TAS2R13;TAS2R14;TAS2R16;TAS2R19;TAS2R20;TAS2R3;TAS2R30;TAS2R31;TAS2R38;TAS2R39;TAS2R4;TAS2R40;TAS2R41;TAS2R42;TAS2R43;TAS2R46;TAS2R5;TAS2R50;TAS2R60;TAS2R7;TAS2R8;TAS2R9
sensory perception of chemical stimulus (GO:0007606)	97	7	ADCY3;BEST2;C5AR1;CD36;DRD2;GFY;GNAL;GNAS;MKKS;OBP2A;OBP2B;OMP;OR10A2;OR10A3;OR10A4;OR10A5;OR10A6;OR10A7;OR10AD1;OR10AG1;OR10C1;OR10G4;OR10G7;OR10G8;OR10G9;OR10J1;OR10J3;OR10K1;OR10K2;OR10P1;OR10Q1;OR10R2;OR10S1;OR10T2;OR10V1;OR10W1;OR10Z1;OR11L1;OR12D2;OR12D3;OR13C2;OR13C3;OR13C4;OR13C5;OR13C8;OR13C9;OR13D1;OR13G1;OR13H1;OR14A16;OR14C36;OR14I1;OR14J1;OR1B1;OR1C1;OR1D2;OR1D5;OR1E1;OR1E2;OR1G1;OR1…
regulation of type I interferon-mediated signaling pathway (GO:0060338)	110	7	CACTIN;CDC37;CNOT7;FADD;HSP90AB1;IFNA1;IFNA10;IFNA14;IFNA16;IFNA17;IFNA2;IFNA21;IFNA4;IFNA5;IFNA6;IFNA7;IFNA8;IFNAR1;IFNAR2;IFNB1;MAVS;MUL1;NLRC5;PTPN1;PTPN2;STAT2;TRIM6;TYK2;UBE2K;USP18;WNT5A;ZBP1
lymphocyte chemotaxis (GO:0048247)	119	7	ADAM8;CCL1;CCL11;CCL13;CCL14;CCL15;CCL16;CCL17;CCL18;CCL19;CCL2;CCL20;CCL21;CCL22;CCL23;CCL24;CCL25;CCL26;CCL3;CCL3L1;CCL4;CCL4L1;CCL5;CCL7;CCL8;CH25H;CX3CL1;CXCL10;CXCL11;CXCL13;CXCL16;CXCL9;CYP7B1;DEFA1;GAS6;GPR183;PIK3CG;SAA1;XCL1;XCL2
B cell differentiation (GO:0030183)	133	7	ADAM17;BLNK;CD79A;CD79B;CEBPG;CLCF1;CR2;FLT3;FNIP1;HDAC4;HDAC5;HDAC9;HHEX;IFNA1;IFNA10;IFNA14;IFNA16;IFNA17;IFNA2;IFNA21;IFNA4;IFNA5;IFNA6;IFNA7;IFNA8;IFNB1;IFNE;IFNK;IFNW1;IL10;IL4;JAK3;KIT;LYL1;MSH2;NFAM1;PLCG2;PTPN2;RAG1;RAG2;TCF3;TPD52;VCAM1
Systemic lupus erythematosus	24	6	ACTN1;ACTN4;C1R;C1S;C2;C3;C4A;C4B;C5;C6;C7;C8A;C8B;C8G;C9;CD28;CD40;CD40LG;CD80;CD86;ELANE;FCGR1A;FCGR2A;FCGR3A;FCGR3B;GRIN2A;GRIN2B;H2AFB1;H2AFB2;H2AFB3;H2AFJ;H2AFV;H2AFX;H2AFY;H2AFY2;H2AFZ;H2BFM;H2BFWT;H3F3A;H3F3B;H3F3C;HIST1H2AA;HIST1H2AB;HIST1H2AC;HIST1H2AD;HIST1H2AE;HIST1H2AG;HIST1H2AH;HIST1H2AI;HIST1H2AJ;HIST1H2AK;HIST1H2AL;HIST1H2AM;HIST1H2BA;HIST1H2BB;HIST1H2BC;HIST1H2BD;HIST1H2BE;HIST1H2…
cellular response to interleukin-1 (GO:0071347)	35	6	ADAMTS12;ADAMTS7;BTRC;CACTIN;CCL1;CCL11;CCL13;CCL14;CCL15;CCL16;CCL17;CCL18;CCL19;CCL2;CCL20;CCL21;CCL22;CCL23;CCL24;CCL25;CCL26;CCL3;CCL3L1;CCL4;CCL4L1;CCL5;CCL7;CCL8;CHUK;CUL1;CX3CL1;DAB2IP;FBXW11;HIF1A;HYAL1;HYAL2;HYAL3;IKBKB;IKBKG;IL1A;IL1B;IL1R1;IL1R2;IL1RAP;IL1RN;IRAK1;MAP2K6;MAP3K3;MAP3K7;MAP3K8;MAPK11;MYD88;NFKB1;NFKBIA;NKX3-1;NLRP7;NOD2;PELI1;PELI3;PLCB1;PSMA1;PSMA2;PSMA4;PSMA5;PSMA6;PSM…
Gene Expression_Homo sapiens_R-HSA-74160	45	6	AAAS;AARS;ADAR;ADARB1;ADAT1;ADAT3;AGO1;AGO3;AGO4;AIFM2;AIMP1;AKT1;AKT2;ALKBH8;ANP32A;APAF1;APEH;AR;ARID3A;ARID4B;ASZ1;ATF2;ATM;ATP1B4;ATR;ATRIP;AURKA;AURKB;BANP;BARD1;BAX;BAZ1B;BAZ2A;BBC3;BCAS2;BCL6;BDP1;BIRC5;BLM;BRCA1;BRD1;BRF1;BRF2;BRIP1;BTG2;C1D;C2ORF49;CARM1;CARS;CARS2;CASC3;CASP1;CASP10;CASP2;CASP6;CCAR1;CCNA1;CCNB1;CCNE1;CCNE2;CCNG1;CCNH;CCNK;CCNT2;CD2BP2;CD3EAP;CD44;CDC25C;CDC40;CDK1;CDK1…
NOD-like receptor signaling pathway	50	6	ANTXR1;ANTXR2;ATG12;ATG16L1;ATG5;CAMP;CARD16;CARD17;CARD18;CARD6;CARD8;CARD9;CASP1;CASP12;CASP4;CASP5;CASR;CCL2;CTSB;CXCL1;CXCL2;CXCL3;CYBA;DEFA1;DEFA1B;DEFA3;DEFA4;DEFA5;DEFA6;DEFB103A;DEFB103B;DEFB4A;DEFB4B;FADD;GBP1;GBP2;GBP3;GBP4;GBP5;GBP7;HSP90AA1;IFNA1;IFNA10;IFNA13;IFNA14;IFNA16;IFNA17;IFNA2;IFNA21;IFNA4;IFNA5;IFNA6;IFNA7;IFNA8;IFNAR1;IFNAR2;IFNB1;IL18;IL1B;IRF9;ITPR1;JUN;MAP3K7;MAPK9;MEFV…
Alcoholism	53	6	ADCY5;ADORA2A;ADORA2B;ARAF;ATF2;ATF4;ATF6B;BDNF;BRAF;CALM1;CALM2;CALM3;CALML4;CAMK4;CAMKK1;CAMKK2;CREB1;CREB3;CREB3L1;CREB3L2;CREB3L3;CREB3L4;CREB5;CRH;DDC;DRD1;DRD2;FOSB;GNAI1;GNAI2;GNAI3;GNAO1;GNAS;GNB2;GNB3;GNB4;GNB5;GNG10;GNG11;GNG12;GNG13;GNG3;GNG4;GNG5;GNG7;GNG8;GNGT1;GNGT2;GRB2;GRIN1;GRIN2A;GRIN2B;GRIN2C;GRIN2D;GRIN3A;GRIN3B;H2AFB1;H2AFB2;H2AFB3;H2AFJ;H2AFV;H2AFX;H2AFY;H2AFY2;H2AFZ;H2BFM;H…
sensory perception of smell (GO:0007608)	79	6	ADCY3;BEST2;DRD2;GFY;GNAL;MKKS;OBP2B;OMP;OR10A2;OR10A3;OR10A4;OR10A5;OR10A6;OR10A7;OR10AD1;OR10AG1;OR10C1;OR10G4;OR10G7;OR10G8;OR10G9;OR10P1;OR10Q1;OR10S1;OR10V1;OR10W1;OR11L1;OR13C2;OR13C3;OR13C4;OR13C5;OR13C8;OR13C9;OR13D1;OR13H1;OR14A16;OR14C36;OR14I1;OR14J1;OR1C1;OR1Q1;OR2A1;OR2A12;OR2A14;OR2A2;OR2A5;OR2AE1;OR2AG1;OR2AG2;OR2AK2;OR2B11;OR2B2;OR2B3;OR2B6;OR2C3;OR2D2;OR2D3;OR2F1;OR2F2;OR2G2;OR2G…
bitter taste receptor activity (GO:0033038)	86	6	TAS2R1;TAS2R10;TAS2R13;TAS2R14;TAS2R16;TAS2R19;TAS2R20;TAS2R3;TAS2R30;TAS2R31;TAS2R38;TAS2R39;TAS2R4;TAS2R40;TAS2R41;TAS2R42;TAS2R43;TAS2R46;TAS2R5;TAS2R50;TAS2R60;TAS2R7;TAS2R8;TAS2R9
Class C/3 (Metabotropic glutamate/pheromone receptors)_Homo sapiens_R-HSA-420499	110	6	CASR;GABBR2;GPRC6A;GRM1;GRM3;GRM5;GRM6;GRM7;GRM8;TAS1R1;TAS1R2;TAS1R3;TAS2R1;TAS2R10;TAS2R13;TAS2R14;TAS2R16;TAS2R19;TAS2R20;TAS2R3;TAS2R30;TAS2R31;TAS2R38;TAS2R39;TAS2R4;TAS2R40;TAS2R41;TAS2R42;TAS2R43;TAS2R46;TAS2R5;TAS2R50;TAS2R60;TAS2R7;TAS2R8;TAS2R9
intermediate filament (GO:0005882)	122	6	CLIP1;CSNK1A1;DLGAP2;DSP;FBF1;FLG;GPER1;KRT10;KRT13;KRT14;KRT16;KRT18;KRT2;KRT20;KRT3;KRT4;KRT5;KRT6A;KRT7;KRT71;KRT75;KRT76;KRT8;KRT82;KRT84;MICAL1;NARF;NCKIPSD;PKP1;PKP2;PNN;PRPH;SHANK2;TCHP;TLK2
chemokine activity (GO:0008009)	122	6	C5;CCL1;CCL11;CCL13;CCL14;CCL15;CCL16;CCL17;CCL18;CCL19;CCL2;CCL20;CCL21;CCL22;CCL23;CCL24;CCL25;CCL26;CCL3;CCL3L1;CCL4;CCL4L1;CCL5;CCL7;CCL8;CX3CL1;CXCL1;CXCL10;CXCL11;CXCL12;CXCL13;CXCL16;CXCL2;CXCL3;CXCL5;CXCL6;CXCL9;PF4;PF4V1;PPBP;XCL1;XCL2
chemokine receptor binding (GO:0042379)	128	6	C5;CCL1;CCL11;CCL13;CCL14;CCL15;CCL16;CCL17;CCL18;CCL19;CCL2;CCL20;CCL21;CCL22;CCL23;CCL24;CCL25;CCL26;CCL3;CCL3L1;CCL4;CCL4L1;CCL5;CCL7;CCL8;CCRL2;CX3CL1;CXCL1;CXCL10;CXCL11;CXCL12;CXCL13;CXCL16;CXCL2;CXCL3;CXCL5;CXCL6;CXCL9;ITCH;PF4;PF4V1;PPBP;XCL1;XCL2
chemokine-mediated signaling pathway (GO:0070098)	133	6	ACKR3;CCL1;CCL11;CCL13;CCL14;CCL15;CCL16;CCL17;CCL18;CCL19;CCL2;CCL20;CCL21;CCL22;CCL23;CCL24;CCL25;CCL26;CCL3;CCL3L1;CCL4;CCL4L1;CCL5;CCL7;CCL8;CCR1;CCR2;CIB1;CX3CL1;CXCL1;CXCL10;CXCL11;CXCL12;CXCL13;CXCL2;CXCL3;CXCL5;CXCL6;CXCL9;FOXC1;GPR35;GPR75;PF4;PF4V1;PPBP;TFF2;THPO;XCL1;XCL2
neutrophil chemotaxis (GO:0030593)	135	6	CCL1;CCL11;CCL13;CCL14;CCL15;CCL16;CCL17;CCL18;CCL19;CCL2;CCL20;CCL21;CCL22;CCL23;CCL24;CCL25;CCL26;CCL3;CCL3L1;CCL4;CCL4L1;CCL5;CCL7;CCL8;CX3CL1;CXCL3;CXCL6;CXCR2;EDN2;EDN3;FCER1G;GBF1;ITGB2;NCKAP1L;PDE4B;PIK3CD;PIK3CG;PIP5K1C;PLA2G1B;S100A12;S100A8;S100A9;SAA1;SYK;TGFB2;XCL1;XCL2
keratinocyte differentiation (GO:0030216)	142	6	ACER1;ADAM9;AKR1C3;ANXA1;CASP3;CERS3;CLIC4;CSTA;EPHA2;EREG;EVPL;EXPH5;FLG;IVL;JAG1;KRT10;KRT16;LCE1A;LCE1B;LCE1C;LCE1D;LCE1E;LCE1F;LCE2A;LCE2B;LCE2C;LCE2D;LCE3A;LCE3B;LCE3C;LCE3D;LCE3E;LCE4A;LCE5A;LELP1;LOR;MBD4;PIP5K1A;PRR9;S100A7;SCEL;SPRR1A;SPRR1B;SPRR2A;SPRR2B;SPRR2D;SPRR2E;SPRR2F;SPRR2G;SPRR3;SPRR4;ST14;TGM1;TGM3;TXNIP;WNT16;WNT5A
T cell activation (GO:0042110)	178	6	BLK;CCL19;CCL21;CCR7;CD276;CD3D;CD3E;CD3G;CD7;CD8A;CD8B;CTPS1;CXADR;DDOST;DLL4;DPP4;EIF2AK4;F2RL1;FYN;GPR18;HSPD1;IFNA1;IFNA10;IFNA14;IFNA16;IFNA17;IFNA2;IFNA21;IFNA4;IFNA5;IFNA6;IFNA7;IFNA8;IFNB1;IFNE;IFNK;IFNW1;IL4;INS;ITK;JAG2;KIF13B;KIT;LCK;LCP1;LEP;MICA;MICB;NCK1;NCK2;NHEJ1;PIK3CG;PPP3CA;PRLR;PTPN2;PTPRC;TNFRSF4;TNFSF14;TXK;ZAP70
Toll-like receptor signaling pathway	6	5	AKT2;AKT3;CCL3;CCL3L1;CCL3L3;CCL4;CCL4L1;CCL4L2;CCL5;CD80;CD86;CHUK;CTSK;CXCL10;CXCL11;CXCL9;FADD;IFNA1;IFNA10;IFNA13;IFNA14;IFNA16;IFNA17;IFNA2;IFNA21;IFNA4;IFNA5;IFNA6;IFNA7;IFNA8;IFNAR1;IFNAR2;IFNB1;IKBKE;IL12A;IL1B;IRF3;JUN;LY96;MAP2K3;MAP2K4;MAP3K8;MAPK10;MAPK8;MAPK9;MYD88;NFKB1;NFKBIA;PIK3CA;PIK3CB;PIK3R1;PIK3R2;PIK3R3;RELA;RIPK1;SPP1;TAB1;TIRAP;TLR1;TLR3;TLR6;TLR7;TLR8;TLR9;TRAF6
integral component of plasma membrane (GO:0005887)	31	5	ABCA1;ABCB11;ABCB4;ABCB5;ABCC10;ABCC11;ABCC2;ABCC3;ABCC4;ABCC5;ABCC8;ABCC9;ABCG5;ABCG8;ACKR2;ACKR4;ACVR1;ACVR1B;ACVR1C;ACVR2A;ACVR2B;ACVRL1;ADAM17;ADAM2;ADAM23;ADAM29;ADAM8;ADCY1;ADCY2;ADCY3;ADCYAP1R1;ADORA1;ADORA2A;ADORA2B;ADORA3;ADRA1A;ADRA1B;ADRA1D;ADRA2A;ADRA2B;ADRA2C;ADRB1;ADRB2;ADRB3;ADRM1;AGER;AGTR1;AGTR2;AJAP1;ALCAM;ALK;ANKH;APCDD1;APH1A;APLNR;APOM;APP;AQP1;AQP2;AQP4;AQP5;AQP6;AQP7;ART1;A…
JAK-STAT signaling pathway	43	5	AKT2;AKT3;CCND1;CISH;CNTFR;CREBBP;CRLF2;CSF2;CSF2RA;CSF2RB;CSF3;CSH1;CSH2;CTF1;EGFR;EP300;EPOR;FHL1;GFAP;GH1;GH2;GHR;GRB2;IFNA1;IFNA10;IFNA13;IFNA14;IFNA16;IFNA17;IFNA2;IFNA21;IFNA4;IFNA5;IFNA6;IFNA7;IFNA8;IFNAR1;IFNAR2;IFNB1;IFNE;IFNGR1;IFNGR2;IFNK;IFNL1;IFNL2;IFNL3;IFNLR1;IFNW1;IL10;IL10RA;IL10RB;IL11RA;IL12A;IL12RB1;IL13;IL13RA1;IL13RA2;IL17D;IL19;IL20;IL20RA;IL20RB;IL21R;IL22RA1;IL22RA2;IL23A…
Necroptosis	43	5	AIFM1;BAX;CAMK2A;CAMK2G;CAPN1;CASP1;CHMP1A;CHMP2B;CHMP3;CHMP4A;CHMP4C;CHMP5;CHMP6;CHMP7;DNM1L;EIF2AK2;FADD;FAF1;FAS;FTL;H2AFJ;H2AFX;H2AFY;H2AFY2;HIST1H2AA;HIST1H2AB;HIST1H2AC;HIST1H2AD;HIST1H2AE;HIST1H2AG;HIST1H2AH;HIST1H2AI;HIST1H2AJ;HIST1H2AK;HIST1H2AL;HIST1H2AM;HIST2H2AA3;HIST2H2AA4;HIST2H2AB;HIST2H2AC;HMGB1;IFNA1;IFNA10;IFNA13;IFNA14;IFNA16;IFNA17;IFNA2;IFNA21;IFNA4;IFNA5;IFNA6;IFNA7;IFNA8;IF…
CXCR chemokine receptor binding (GO:0045236)	52	5	CXCL1;CXCL10;CXCL11;CXCL12;CXCL13;CXCL2;CXCL3;CXCL5;CXCL6;CXCL9;PF4;PF4V1;PPBP
Chemokine signaling pathway	59	5	ADCY1;ADCY2;ADCY3;ADCY4;ADCY5;ADCY9;AKT1;AKT3;ARRB1;BAD;BCAR1;BRAF;CCL1;CCL11;CCL13;CCL14;CCL15;CCL16;CCL17;CCL18;CCL19;CCL2;CCL20;CCL21;CCL22;CCL23;CCL24;CCL25;CCL26;CCL27;CCL28;CCL3;CCL3L1;CCL3L3;CCL4;CCL4L1;CCL4L2;CCL5;CCL7;CCL8;CCR1;CCR10;CCR2;CCR3;CCR4;CCR5;CCR6;CCR7;CCR8;CCR9;CHUK;CX3CL1;CX3CR1;CXCL1;CXCL10;CXCL11;CXCL12;CXCL13;CXCL14;CXCL2;CXCL3;CXCL5;CXCL6;CXCL9;CXCR1;CXCR2;CXCR3;CXCR4;CX…
cellular response to zinc ion (GO:0071294)	65	5	ATP13A2;GLRA1;HVCN1;MT1A;MT1B;MT1E;MT1F;MT1G;MT1H;MT1M;MT1X;MT2A;MT3;MT4;ZNF658
Activated PKN1 stimulates transcription of AR (androgen receptor) regulated genes KLK2 and KLK3_Homo sapiens_R-HSA-5625886	101	5	AR;H2AFX;H2AFZ;H3F3A;HIST1H2AB;HIST1H2AC;HIST1H2AD;HIST1H2AJ;HIST1H2BA;HIST1H2BB;HIST1H2BC;HIST1H2BD;HIST1H2BH;HIST1H2BK;HIST1H2BL;HIST1H2BM;HIST1H2BN;HIST1H2BO;HIST1H3A;HIST1H4A;HIST2H2AA3;HIST2H2AC;HIST2H2BE;HIST2H3A;HIST3H2BB;KDM4C;KLK2;KLK3;NCOA2;PKN1
SIRT1 negatively regulates rRNA Expression_Homo sapiens_R-HSA-427359	102	5	H2AFX;H2AFZ;H3F3A;HIST1H2AB;HIST1H2AC;HIST1H2AD;HIST1H2AJ;HIST1H2BA;HIST1H2BB;HIST1H2BC;HIST1H2BD;HIST1H2BH;HIST1H2BK;HIST1H2BL;HIST1H2BM;HIST1H2BN;HIST1H2BO;HIST1H3A;HIST1H4A;HIST2H2AA3;HIST2H2AC;HIST2H2BE;HIST2H3A;HIST3H2BB;RRP8;SIRT1;SUV39H1;TAF1A;TAF1B;TAF1D;TBP
detection of chemical stimulus involved in sensory perception of bitter taste (GO:0001580)	111	5	AZGP1;CST1;CST2;CST4;GNAT3;LPO;PIP;RTP1;RTP2;RTP4;TAS2R1;TAS2R10;TAS2R13;TAS2R14;TAS2R16;TAS2R19;TAS2R20;TAS2R3;TAS2R30;TAS2R31;TAS2R38;TAS2R39;TAS2R4;TAS2R40;TAS2R41;TAS2R42;TAS2R43;TAS2R46;TAS2R5;TAS2R50;TAS2R60;TAS2R7;TAS2R8;TAS2R9
sensory perception of bitter taste (GO:0050913)	114	5	AZGP1;CALHM1;CST1;CST2;CST4;GNAT3;LPO;PIP;RTP1;RTP2;RTP4;TAS2R1;TAS2R10;TAS2R13;TAS2R14;TAS2R16;TAS2R19;TAS2R20;TAS2R3;TAS2R30;TAS2R31;TAS2R38;TAS2R39;TAS2R4;TAS2R40;TAS2R41;TAS2R42;TAS2R43;TAS2R46;TAS2R5;TAS2R50;TAS2R60;TAS2R7;TAS2R8;TAS2R9
GPCR ligand binding_Homo sapiens_R-HSA-500792	118	5	ACKR2;ACKR3;ACKR4;ADCYAP1;ADCYAP1R1;ADM;ADORA1;ADORA2A;ADORA2B;ADRA1A;ADRA1B;ADRA1D;ADRA2A;ADRA2B;ADRA2C;ADRB1;ADRB2;ADRB3;AGT;AGTR1;AGTR2;ANXA1;APLN;APLNR;AVP;AVPR1A;AVPR1B;AVPR2;BDKRB1;BDKRB2;BRS3;C3;C3AR1;C5;C5AR1;C5AR2;CALCA;CALCR;CALCRL;CASR;CCK;CCKAR;CCKBR;CCL1;CCL11;CCL16;CCL17;CCL19;CCL2;CCL20;CCL21;CCL22;CCL23;CCL25;CCL27;CCL28;CCL3;CCL3L1;CCL4;CCL5;CCL7;CCR1;CCR10;CCR2;CCR3;CCR4;CCR5;CC…
detection of chemical stimulus involved in sensory perception of taste (GO:0050912)	119	5	AZGP1;CST1;CST2;CST4;GNAT3;LPO;PIP;PKD2L1;RTP1;RTP2;RTP4;TAS1R2;TAS2R1;TAS2R10;TAS2R13;TAS2R14;TAS2R16;TAS2R19;TAS2R20;TAS2R3;TAS2R30;TAS2R31;TAS2R38;TAS2R39;TAS2R4;TAS2R40;TAS2R41;TAS2R42;TAS2R43;TAS2R46;TAS2R5;TAS2R50;TAS2R60;TAS2R7;TAS2R8;TAS2R9
nervous system development (GO:0007399)	120	5	ABTB2;ACHE;ADAM22;ADAM23;ADORA1;AHI1;ANKLE2;APAF1;APBA1;APBA2;APLP1;ARHGAP26;ARNT2;ASCL1;ASIC2;ATN1;ATXN10;B3GNT5;BARHL1;BARHL2;BARX1;BARX2;BCAN;BCL11A;BCL11B;BDNF;BPNT1;BTBD1;BTBD11;BTBD2;BTBD3;BTD;CABLES1;CAMK2A;CAMK2G;CDH1;CDH16;CDH2;CDHR4;CDK5;CDK5RAP2;CHAC1;CHD7;CHRM1;CHRM2;CHRM3;CHRNA3;CHST8;CLN5;CLN8;CNTN4;CNTN6;COPS2;CRIM1;CRMP1;CSGALNACT1;CSK;CSPG5;CXCL1;CYP26C1;CYP46A1;DACT1;DAGLA;DAGLB…
cellular response to cytokine stimulus (GO:0071345)	121	5	ADAMTS12;ADAMTS7;AKT1;ALOX15;ALOX5;ANKRD1;ANXA1;AQP4;ARHGEF2;ASPN;BAG4;BATF;BCL2L1;BCL6;BGN;BIRC5;BRCA1;CACTIN;CASP1;CASP3;CBL;CCL1;CCL11;CCL13;CCL14;CCL15;CCL16;CCL17;CCL18;CCL19;CCL2;CCL20;CCL21;CCL22;CCL23;CCL24;CCL25;CCL26;CCL3;CCL3L1;CCL4;CCL4L1;CCL5;CCL7;CCL8;CCND1;CCR1;CCR2;CCR5;CCR7;CD58;CD80;CD86;CDC34;CDK9;CEBPA;CEBPD;CHAD;CHI3L1;CHUK;CIB1;CISH;CLCF1;CNTF;CNTFR;CNTN1;COL1A2;CRHBP;CRK;CR…
peptide cross-linking (GO:0018149)	123	5	ABCA7;ANXA1;COL3A1;CSTA;EVPL;FLG;FN1;IVL;KRT1;KRT10;KRT2;LCE1A;LCE1B;LCE1C;LCE1D;LCE1E;LCE1F;LCE2A;LCE2B;LCE2C;LCE2D;LCE3A;LCE3B;LCE3C;LCE3D;LCE3E;LCE4A;LCE5A;LELP1;LOR;NDNF;PI3;PRR9;SPRR1A;SPRR1B;SPRR2A;SPRR2B;SPRR2D;SPRR2E;SPRR2F;SPRR3;SPRR4;TGM1;TGM3
Chemokine receptors bind chemokines_Homo sapiens_R-HSA-380108	137	5	ACKR2;ACKR3;ACKR4;CCL1;CCL11;CCL16;CCL17;CCL19;CCL2;CCL20;CCL21;CCL22;CCL25;CCL27;CCL28;CCL3;CCL3L1;CCL4;CCL5;CCL7;CCR1;CCR10;CCR2;CCR3;CCR4;CCR5;CCR6;CCR7;CCR8;CCR9;CCRL2;CX3CL1;CX3CR1;CXCL1;CXCL10;CXCL11;CXCL12;CXCL13;CXCL2;CXCL3;CXCL5;CXCL6;CXCL9;CXCR1;CXCR2;CXCR3;CXCR4;CXCR5;CXCR6;PF4;PPBP;XCL1;XCL2;XCR1
granulocyte chemotaxis (GO:0071621)	138	5	ANXA1;CCL1;CCL11;CCL13;CCL14;CCL15;CCL16;CCL17;CCL18;CCL19;CCL2;CCL20;CCL21;CCL22;CCL23;CCL24;CCL25;CCL26;CCL3;CCL3L1;CCL4;CCL4L1;CCL5;CCL7;CCL8;CX3CL1;CXCL3;CXCL6;CXCR2;EDN2;EDN3;FCER1G;GBF1;ITGB2;NCKAP1L;PDE4B;PIK3CD;PIK3CG;PIP5K1C;S100A12;S100A8;S100A9;SAA1;SCG2;SYK;TGFB2;XCL1;XCL2
neutrophil migration (GO:1990266)	140	5	CCL1;CCL11;CCL13;CCL14;CCL15;CCL16;CCL17;CCL18;CCL19;CCL2;CCL20;CCL21;CCL22;CCL23;CCL24;CCL25;CCL26;CCL3;CCL3L1;CCL4;CCL4L1;CCL5;CCL7;CCL8;CX3CL1;CXCL3;CXCL6;CXCR2;EDN2;EDN3;FCER1G;GBF1;ITGB2;NCKAP1L;PDE4B;PIK3CD;PIK3CG;PIP5K1C;PRTN3;S100A12;S100A8;S100A9;SAA1;SYK;TGFB2;XCL1;XCL2
regulation of nucleic acid-templated transcription (GO:1903506)	143	5	ABCG1;ABL1;ACTN4;ACVR1B;ACVR2B;ACVRL1;AHR;AIRE;AJUBA;ANKRD30A;APBB1;APBB2;ARNT2;ARNTL;ASCC1;ASCL2;ASH2L;ATF2;ATF4;ATF5;ATF7;ATP1B4;BACH1;BAZ1A;BAZ2B;BCL11A;BCL11B;BHLHE40;BMP2;BPTF;BRCA2;BRDT;CALR;CARM1;CDK11A;CELSR2;CHD3;CHD7;CNOT8;CRABP2;CREBBP;CREM;CRX;CTR9;CXXC1;DACH1;DAPK3;DENND4A;DLX4;DMTF1;DNM2;E2F1;EDF1;EFEMP1;ELAVL2;ENG;EP300;ESR2;ESRRA;ESRRB;EZH2;FADS1;FOXC1;FOXP3;FZD7;GATA4;GCFC2;GLRX2…
regulation of cellular macromolecule biosynthetic process (GO:2000112)	147	5	ABCG1;ABL1;ACVR1B;ACVR2B;ACVRL1;AHR;AIRE;AJUBA;ANKRD17;ANKRD30A;APBB1;APBB2;APP;ARNT2;ARNTL;ASCC1;ASCL2;ASH2L;ATF2;ATF4;ATF5;ATF7;ATP1B4;BACH1;BAZ1A;BAZ2B;BCL11A;BCL11B;BHLHE40;BMP2;BPTF;BRCA2;BRDT;CALR;CARM1;CCDC88A;CDC123;CDK11A;CELSR2;CHD3;CHD7;CNOT8;CRABP2;CREBBP;CREM;CRX;CTR9;CXXC1;CYFIP2;DACH1;DAPK3;DDX6;DENND4A;DLX4;DMTF1;DNM2;E2F1;EDF1;EFEMP1;EIF2A;EIF2B4;EIF4E;ELAVL2;ENG;EP300;ESCO1;ESCO…
epidermal cell differentiation (GO:0009913)	152	5	ACER1;ADAM9;AKR1C3;ANXA1;CASP3;CERS3;CLIC4;CSTA;CTNNB1;EPHA2;ERCC2;ERCC3;EREG;EVPL;FLG;GLI1;HDAC1;HDAC2;IVL;JAG1;KRT10;KRT16;LCE1A;LCE1B;LCE1C;LCE1D;LCE1E;LCE1F;LCE2A;LCE2B;LCE2C;LCE2D;LCE3A;LCE3B;LCE3C;LCE3D;LCE3E;LCE4A;LCE5A;LELP1;LOR;MBD4;PIP5K1A;PITX2;PRR9;S100A7;SCEL;SPINK5;SPRR1A;SPRR1B;SPRR2A;SPRR2B;SPRR2D;SPRR2E;SPRR2F;SPRR2G;SPRR3;SPRR4;ST14;TGM1;TGM3;TXNIP;USH2A;WNT16;WNT5A
B cell activation (GO:0042113)	160	5	ADAM17;BANK1;BLNK;CD40LG;CD79A;CEBPG;CHRNA4;CLCF1;CTPS1;FLT3;HDAC4;HDAC9;HHEX;IFNA1;IFNA10;IFNA14;IFNA16;IFNA17;IFNA2;IFNA21;IFNA4;IFNA5;IFNA6;IFNA7;IFNA8;IFNB1;IFNE;IFNK;IFNW1;IL4;JAK3;LEF1;LYL1;MEF2C;MSH2;NFAM1;PLCG2;PTPRC;RAG1;RAG2;VCAM1;ZAP70
lymphocyte differentiation (GO:0030098)	160	5	ADAM17;BLNK;CD3D;CD79A;CEBPG;CHD7;CLCF1;CR2;DLL4;FLT3;HDAC4;HDAC5;HDAC9;HNF1A;IFNA1;IFNA10;IFNA14;IFNA16;IFNA17;IFNA2;IFNA21;IFNA4;IFNA5;IFNA6;IFNA7;IFNA8;IFNB1;IFNE;IFNK;IFNW1;IL10;JAK3;KIT;LYL1;MSH2;NFAM1;PLCG2;PTPN22;PTPRC;RAG1;RAG2;RELB;RHOH;TPD52;TXK;VCAM1;ZAP70
RIG-I/MDA5 mediated induction of IFN-alpha/beta pathways_Homo sapiens_R-HSA-168928	166	5	AGER;ATG12;DDX58;DHX58;EP300;FADD;HMGB1;IFNA1;IFNA10;IFNA14;IFNA16;IFNA17;IFNA2;IFNA21;IFNA4;IFNA5;IFNA6;IFNA7;IFNA8;IFNB1;IKBKE;IRF1;IRF2;IRF3;MAP3K1;MAVS;NFKB1;NFKB2;NFKBIA;NFKBIB;NLRC5;NLRX1;PCBP2;RELA;RIPK1;RNF135;S100A12;SIKE1;TAX1BP1;TNFAIP3;TRAF6;UBA52;UBA7;UBB;UBE2D3;UBE2K
positive regulation of peptidyl-serine phosphorylation (GO:0033138)	174	5	APP;ARAF;AVP;BRAF;CAMK1;CAPRIN2;CD44;CREBL2;CSF3;DOCK7;EGFR;EIF4G1;HAX1;HCLS1;IFNA1;IFNA10;IFNA14;IFNA16;IFNA17;IFNA2;IFNA21;IFNA4;IFNA5;IFNA6;IFNA7;IFNA8;IFNB1;IFNE;IFNW1;IRGM;LIF;MIF;NTRK3;OSM;PARK7;PDCD10;PFN2;PINK1;PRKD1;PRKD2;RAF1;RPTOR;STOX1;TCL1A;TCL1B
skin development (GO:0043588)	184	5	ABCB6;ACER1;ADAM9;AKR1C3;ALOX12;ALOX12B;ALOXE3;ANXA1;ASCL4;ASPRV1;CASP3;CERS3;CLDN1;CLDN4;CLIC4;COL1A1;COL1A2;COL3A1;COL5A1;COL5A2;COL5A3;CSTA;DACT2;DHCR24;DLL1;EPHA2;EREG;ERRFI1;EVPL;FLG;FLG2;HRNR;ITGA3;ITGA6;ITGB4;IVL;JAG1;KRT10;KRT16;KRT9;LCE1A;LCE1B;LCE1C;LCE1D;LCE1E;LCE1F;LCE2A;LCE2B;LCE2C;LCE2D;LCE3A;LCE3B;LCE3C;LCE3D;LCE3E;LCE4A;LCE5A;LELP1;LOR;MBD4;MET;PIP5K1A;PKD1;PRR9;RPTN;RYR1;S100A7;S…
regulation of gene expression (GO:0010468)	5	4	ABCG1;ABL1;ACTG2;ACVR1B;ACVR2B;ACVRL1;ADM2;AES;AFF2;AGGF1;AGR2;AHNAK;AHNAK2;AHR;AIRE;AJUBA;AKAP8L;AKR1B1;AKT1;ALOX12B;ALPK3;AMH;ANK3;ANKRD30A;ANXA7;APBB1;APBB2;APP;ARNT2;ARNTL;ASCC1;ASCL2;ASH2L;ATF2;ATF4;ATF5;ATF7;ATP1B1;ATP1B4;ATRAID;AVP;AVPR2;AZU1;BACH1;BAZ2B;BCL11A;BCL11B;BHLHE40;BMI1;BMP2;BPTF;BRAF;BRCA1;BRCA2;BRDT;C1QTNF1;CALCOCO1;CALCR;CALR;CARM1;CCL3;CCR1;CD28;CD36;CD3E;CDK1;CDK10;CDK11A;C…
hydrolase activity, acting on carbon-nitrogen (but not peptide) bonds, in linear amidines (GO:0016813)	11	4	AGMAT;PADI1;PADI2;PADI3;PADI4
cytokine receptor binding (GO:0005126)	28	4	ADAM17;BMP10;BMP3;BMP5;CCL19;CCL21;CD300LF;CLCF1;FADD;GDF11;GDF7;GDF9;IFNA1;IFNA10;IFNA14;IFNA16;IFNA17;IFNA2;IFNA21;IFNA4;IFNA5;IFNA6;IFNA7;IFNA8;IFNB1;IFNE;IFNK;IFNL1;IFNW1;IL13;IL1A;IL1B;IL1F10;IL1RN;IL23A;IL25;IL3;IL36A;IL36B;IL36G;IL36RN;IL37;IL4;IL5;INHBB;INHBC;INHBE;JAK2;LIF;LIFR;OSM;PXDN;SMAD3;SPRED1;SPRED2;TGFB1;TGFBR3;TGFBRAP1;TIMM50;TLR9;TNFSF11;TSLP;USP15
Measles	28	4	AKT2;BAX;BBC3;BID;CASP3;CBLB;CCND1;CCNE1;CD3D;CD3E;CD3G;CDK2;CDK4;CSNK2A1;CSNK2A2;CSNK2A3;CSNK2B;CYCS;DDX58;FADD;FAS;GSK3B;HSPA1A;HSPA1B;HSPA1L;IFNA1;IFNA10;IFNA13;IFNA14;IFNA16;IFNA17;IFNA2;IFNA21;IFNA4;IFNA5;IFNA6;IFNA7;IFNA8;IFNAR1;IFNAR2;IFNB1;IL12A;IL2RB;IL2RG;IRF3;JAK3;MAP3K7;MAVS;MSN;MX1;NFKBIB;PIK3CA;PIK3CB;PIK3CD;PIK3R1;PIK3R2;PIK3R3;RELA;STAT2;TLR9;TNFAIP3;TRAF6
Hepatitis C	37	4	AKT2;BAX;BID;BRAF;CASP3;CCND1;CDK2;CDK4;CLDN1;CLDN11;CLDN14;CLDN16;CLDN17;CLDN18;CLDN19;CLDN25;CLDN5;CLDN8;CYCS;DDX58;EIF3E;FADD;FAS;GRB2;GSK3B;IFIT1;IFIT1B;IFNA1;IFNA10;IFNA13;IFNA14;IFNA16;IFNA17;IFNA2;IFNA21;IFNA4;IFNA5;IFNA6;IFNA7;IFNA8;IFNAR1;IFNAR2;IFNB1;IRF3;KRAS;MAPK1;MAPK3;MAVS;MX1;NRAS;OCLN;PIK3CA;PIK3CB;PIK3CD;PIK3R1;PIK3R2;PIK3R3;PPP2CA;PPP2CB;PPP2R1B;PPP2R2A;PPP2R2C;PPP2R2D;RAF1;RB1;…
keratin filament (GO:0045095)	40	4	FBF1;GPER1;KRT18;KRT3;KRT4;KRT5;KRT71;KRT82;KRT84;TCHP
positive regulation of hydrolase activity (GO:0051345)	49	4	ABR;ALDOB;ALS2;APOA1;ARAP1;ARHGAP21;ARHGAP23;ARHGAP27;ARHGEF38;ARHGEF7;ATP1B1;ATP1B2;ATP1B3;BCAS3;BMP2;CALM1;CALM2;CALM3;CAV2;CCL1;CCL11;CCL13;CCL14;CCL15;CCL16;CCL17;CCL18;CCL19;CCL2;CCL20;CCL21;CCL22;CCL23;CCL24;CCL25;CCL26;CCL3;CCL3L1;CCL4;CCL4L1;CCL5;CCL7;CCL8;CHTOP;CTSH;CX3CL1;DNAJB1;DNAJB2;DNAJC10;DNAJC24;DNMBP;DOCK10;DOCK11;DOCK8;DOCK9;DVL3;ECT2;ERBB2;EVI5;EVI5L;EZH2;F11R;F2R;F2RL1;FGF10;F…
cellular response to copper ion (GO:0071280)	72	4	AOC1;MT1A;MT1B;MT1E;MT1F;MT1G;MT1H;MT1M;MT1X;MT2A;MT3;MT4;PRNP
chemokine receptor activity (GO:0004950)	72	4	ACKR2;ACKR3;ACKR4;CCR1;CCR2;CCR3;CCR4;CCR5;CCR6;CCR7;CCR8;CCR9;CMKLR1;CX3CR1;CXCR1;CXCR2;CXCR3;CXCR4;GPR17;GPR35;GPR75
Human cytomegalovirus infection	73	4	ADCY2;ADCY3;ADCY4;ADCY5;ADCY6;ADCY8;AKAP13;AKT2;ARHGEF1;ARHGEF12;ATF4;ATF6B;B2M;BAK1;BID;CALM2;CALM3;CALML4;CALR;CASP9;CCL2;CCL3;CCL3L1;CCL3L3;CCL4;CCL4L1;CCL4L2;CCL5;CCND1;CCR1;CCR3;CCR5;CDK4;CDKN1A;CDKN2A;CREB1;CREB3;CREB3L2;CREB5;CRKL;CTNNB1;CXCR4;CYCS;E2F2;E2F3;EGFR;FADD;FAS;GNAI2;GNAQ;GNB3;GNB4;GNB5;GNG10;GNG5;GNG8;GNGT2;GRB2;GSK3B;HLA-A;HLA-B;HLA-C;HLA-E;HLA-F;HLA-G;IFNA1;IFNA10;IFNA13;IFNA…
response to copper ion (GO:0046688)	86	4	AOC1;ATP5D;ATP7B;IL1A;MT1A;MT1B;MT1E;MT1F;MT1G;MT1H;MT1M;MT1X;MT2A;MT3;MT4;PRNP
Linoleic acid metabolism	90	4	CYP1A2;CYP2C19;CYP2C8;CYP2C9;JMJD7-PLA2G4B;PLA2G12A;PLA2G2A;PLA2G2C;PLA2G2D;PLA2G2E;PLA2G2F;PLA2G3;PLA2G4A;PLA2G4B;PLA2G4C;PLA2G4D;PLA2G4E;PLA2G4F;PLA2G5;PLB1
cellular response to cadmium ion (GO:0071276)	92	4	AKR1C3;JUN;MAPK1;MAPK3;MAPK9;MT1A;MT1B;MT1E;MT1F;MT1G;MT1H;MT1M;MT1X;MT2A;MT3;MT4
RNA Polymerase I Promoter Opening_Homo sapiens_R-HSA-73728	92	4	H2AFX;H2AFZ;H3F3A;HIST1H2AB;HIST1H2AC;HIST1H2AD;HIST1H2AJ;HIST1H2BA;HIST1H2BB;HIST1H2BC;HIST1H2BD;HIST1H2BH;HIST1H2BK;HIST1H2BL;HIST1H2BM;HIST1H2BN;HIST1H2BO;HIST1H3A;HIST1H4A;HIST2H2AA3;HIST2H2AC;HIST2H2BE;HIST2H3A;HIST3H2BB;MAPK3;MBD2;UBTF
Packaging Of Telomere Ends_Homo sapiens_R-HSA-171306	93	4	ACD;H2AFX;H2AFZ;HIST1H2AB;HIST1H2AC;HIST1H2AD;HIST1H2AJ;HIST1H2BA;HIST1H2BB;HIST1H2BC;HIST1H2BD;HIST1H2BH;HIST1H2BK;HIST1H2BL;HIST1H2BM;HIST1H2BN;HIST1H2BO;HIST1H4A;HIST2H2AA3;HIST2H2AC;HIST2H2BE;HIST3H2BB;HIST3H3;POT1;TERF1;TERF2;TERF2IP
response to cadmium ion (GO:0046686)	95	4	AKR1C3;JUN;MAPK1;MAPK3;MAPK9;MT1A;MT1B;MT1E;MT1F;MT1G;MT1H;MT1M;MT1X;MT2A;MT3;MT4;SLC34A1
DNA methylation_Homo sapiens_R-HSA-5334118	95	4	DNMT3A;DNMT3B;DNMT3L;H2AFX;H2AFZ;H3F3A;HIST1H2AB;HIST1H2AC;HIST1H2AD;HIST1H2AJ;HIST1H2BA;HIST1H2BB;HIST1H2BC;HIST1H2BD;HIST1H2BH;HIST1H2BK;HIST1H2BL;HIST1H2BM;HIST1H2BN;HIST1H2BO;HIST1H3A;HIST1H4A;HIST2H2AA3;HIST2H2AC;HIST2H2BE;HIST2H3A;HIST3H2BB
response to zinc ion (GO:0010043)	98	4	ATP13A2;D2HGDH;GLRA1;HAAO;HVCN1;MT1A;MT1B;MT1E;MT1F;MT1G;MT1H;MT1HL1;MT1M;MT1X;MT2A;MT3;MT4;SLC30A1;SLC30A10;SLC30A2;SLC30A4;SLC30A5;SLC30A6;SLC30A7;SLC30A8;ZACN;ZNF658
PI3K-Akt signaling pathway	103	4	AKT2;AKT3;ANGPT1;ANGPT4;ATF4;ATF6B;BRCA1;C8ORF44-SGK3;CCND1;CCNE1;CDK2;CDK4;CDKN1B;CHAD;CHRM2;COL1A1;COL4A1;COL4A2;COL4A3;COL4A4;COL6A3;COL9A1;COL9A2;COL9A3;COMP;CREB3;CREB3L2;CREB3L4;CREB5;CRTC2;CSF1R;CSF3;DDIT4;EFNA5;EGFR;EIF4B;EIF4E2;EPOR;ERBB2;ERBB3;FGF10;FGF17;FGF18;FGF19;FGF21;FGF3;FGF4;FGF9;FGFR2;FGFR3;FLT1;FLT3;FLT3LG;G6PC;G6PC3;GHR;GNG10;GNG2;GNG4;GNG5;GNG8;GNGT2;GRB2;GYS1;GYS2;IFNA1;IFN…
PRC2 methylates histones and DNA_Homo sapiens_R-HSA-212300	110	4	AEBP2;DNMT3A;DNMT3B;EED;EZH2;H2AFX;H2AFZ;H3F3A;HIST1H2AB;HIST1H2AC;HIST1H2AD;HIST1H2AJ;HIST1H2BA;HIST1H2BB;HIST1H2BC;HIST1H2BD;HIST1H2BH;HIST1H2BK;HIST1H2BL;HIST1H2BM;HIST1H2BN;HIST1H2BO;HIST1H3A;HIST1H4A;HIST2H2AA3;HIST2H2AC;HIST2H2BE;HIST2H3A;HIST3H2BB;JARID2;PHF1;PHF19;RBBP7;SUZ12
ribonuclease activity (GO:0004540)	128	4	ANG;AZGP1;CNOT6;CNOT7;CPSF3;CPSF4;DICER1;DIS3L2;ELAC2;ERN1;PIWIL2;POP4;PPP1R8;RNASE1;RNASE10;RNASE11;RNASE12;RNASE13;RNASE2;RNASE3;RNASE4;RNASE6;RNASE7;RNASE8;RNASE9;RNASEH1;RNASEK;RNASEL;SLFN14;SMG6;SMG7;TSN
DNA Damage/Telomere Stress Induced Senescence_Homo sapiens_R-HSA-2559586	140	4	ACD;ATM;CABIN1;CCNA1;CCNA2;CCNE1;CCNE2;CDK2;CDKN1A;CDKN1B;EP400;H1F0;H2AFB1;H2AFX;H2AFZ;HIRA;HIST1H1A;HIST1H1B;HIST1H1C;HIST1H1D;HIST1H1E;HIST1H2AB;HIST1H2AC;HIST1H2AD;HIST1H2AJ;HIST1H2BA;HIST1H2BB;HIST1H2BC;HIST1H2BD;HIST1H2BH;HIST1H2BK;HIST1H2BL;HIST1H2BM;HIST1H2BN;HIST1H2BO;HIST1H4A;HIST2H2AA3;HIST2H2AC;HIST2H2BE;HIST3H2BB;HIST3H3;HMGA1;LMNB1;NBN;POT1;RAD50;RB1;TERF1;TERF2;TERF2IP;TP53;UBN1
Amyloid fiber formation_Homo sapiens_R-HSA-977225	152	4	APCS;APOA1;APOA4;APP;B2M;BACE1;CALCA;CST3;FGA;FURIN;GGA1;GGA2;GGA3;GSN;H2AFX;H2AFZ;H3F3A;HIST1H2AB;HIST1H2AC;HIST1H2AD;HIST1H2AJ;HIST1H2BA;HIST1H2BB;HIST1H2BC;HIST1H2BD;HIST1H2BH;HIST1H2BK;HIST1H2BL;HIST1H2BM;HIST1H2BN;HIST1H2BO;HIST1H3A;HIST1H4A;HIST2H2AA3;HIST2H2AC;HIST2H2BE;HIST2H3A;HIST3H2BB;IAPP;INS;ITM2B;LTF;LYZ;MFGE8;NAT8;NPPA;ODAM;PARK2;PRL;RPS27A;SAA1;SIAH1;SIAH2;SNCA;SNCAIP;TGFBI;TTR;UB…
response to interferon-gamma (GO:0034341)	153	4	AQP4;CASP1;CCL1;CCL11;CCL13;CCL14;CCL15;CCL16;CCL17;CCL18;CCL2;CCL20;CCL22;CCL23;CCL24;CCL25;CCL26;CCL3;CCL3L1;CCL4;CCL4L1;CCL5;CCL7;CCL8;CD58;CIITA;CX3CL1;DAPK1;DAPK3;EPRS;GBP6;IFITM1;IFITM2;IFITM3;IL23R;KYNU;MEFV;NUB1;PDE12;RPL13A;SLC11A1;SLC26A6;SP100;STAT1;TDGF1;TRIM21;WNT5A;XCL1;XCL2
regulation of innate immune response (GO:0045088)	155	4	ADAM8;EREG;FGR;GBP5;GFI1;HLA-E;IFNA1;IFNA10;IFNA14;IFNA16;IFNA17;IFNA2;IFNA21;IFNA4;IFNA5;IFNA6;IFNA7;IFNA8;IFNB1;IFNK;IRF1;MUL1;OTUD7A;PARP9;POLR3D;POLR3G;STAT2;TNFAIP3;TYRO3;XIAP
intermediate filament cytoskeleton (GO:0045111)	157	4	ADCY5;BCAS3;CLIP1;DCTN1;DDX60;DISC1;EVPL;FLG;INA;KRT10;KRT13;KRT14;KRT16;KRT17;KRT18;KRT2;KRT20;KRT3;KRT4;KRT5;KRT6A;KRT7;KRT75;KRT76;KRT8;KRT80;MDN1;MMP14;NEFM;NOL9;NR1I2;NSFL1C;PJA2;PKN2;PNN;PRPH;S100A8;SAP30BP;SMARCA2;SYNE2;TLK2;ZNF131
endonuclease activity (GO:0004519)	160	4	ANG;APEX1;APLF;CPSF3;CPSF4;DICER1;DIS3;DNASE1;EME1;ERN1;GEN1;LRPPRC;PIWIL2;PNKP;RAD51;RAD51B;RAD51C;RAD51D;RNASE1;RNASE10;RNASE11;RNASE12;RNASE13;RNASE2;RNASE3;RNASE4;RNASE6;RNASE7;RNASE8;RNASE9;RNASEK;RNASEL;SETMAR;SLFN14;SLX4;SMG6;TSN;XRCC2;ZRANB3
response to interleukin-1 (GO:0070555)	163	4	AES;CACTIN;CCL1;CCL11;CCL13;CCL14;CCL15;CCL16;CCL17;CCL18;CCL2;CCL20;CCL22;CCL23;CCL24;CCL25;CCL26;CCL3;CCL3L1;CCL4;CCL4L1;CCL5;CCL7;CCL8;CHI3L1;CX3CL1;HDAC4;HYAL1;HYAL2;HYAL3;IL1R1;MAPK11;MYD88;NLRP7;PTGIS;RC3H1;RELA;SELE;TAF9;TANK;TRAF6;XCL1;XCL2;YTHDC2
Taste transduction	173	4	ADCY6;ADCY8;ASIC2;CACNA1A;CACNA1C;CALHM1;ENTPD2;GABBR2;GABRA1;GABRA5;GABRA6;GNAT3;GNB3;GNG13;GRM1;HTR1A;HTR1D;HTR1F;HTR3A;HTR3B;HTR3C;HTR3D;HTR3E;P2RX3;P2RY1;PDE1A;PDE1C;PKD2L1;PLCB2;PRKACA;SCN2A;SCN3A;SCN9A;SCNN1A;TAS1R2;TAS2R1;TAS2R10;TAS2R13;TAS2R14;TAS2R16;TAS2R19;TAS2R20;TAS2R3;TAS2R30;TAS2R31;TAS2R38;TAS2R39;TAS2R4;TAS2R40;TAS2R41;TAS2R42;TAS2R43;TAS2R46;TAS2R5;TAS2R50;TAS2R60;TAS2R7;TAS2R8…
response to tumor necrosis factor (GO:0034612)	186	4	ADAM9;ADAMTS12;ADIPOQ;AFF3;ARHGEF2;BAG4;BRCA1;CACTIN;CASP8;CCL1;CCL11;CCL13;CCL14;CCL15;CCL16;CCL17;CCL18;CCL2;CCL20;CCL22;CCL23;CCL24;CCL25;CCL26;CCL3;CCL3L1;CCL4;CCL4L1;CCL5;CCL7;CCL8;CD58;CRHBP;CX3CL1;CXCL16;DCSTAMP;GATA3;GCH1;GPER1;HAS2;HMHB1;HYAL1;HYAL2;HYAL3;IKBKB;MAP2K7;MAP4K3;NFE2L2;NUB1;OCSTAMP;PID1;RELA;RPS3;SELE;SFRP1;SMPD4;TANK;TDGF1;XCL1;XCL2;YBX3;YTHDC2;ZFP36L1;ZFP36L2
Dectin-2 family_Homo sapiens_R-HSA-5621480	1	3	CLEC4A;CLEC4C;CLEC4D;CLEC4E;CLEC6A;FCER1G;FYN;LYN
cellular response to interferon-gamma (GO:0071346)	17	3	AQP4;CAMK2B;CAMK2G;CASP1;CCL1;CCL11;CCL13;CCL14;CCL15;CCL16;CCL18;CCL2;CCL20;CCL23;CCL24;CCL25;CCL26;CCL3;CCL3L1;CCL4;CCL4L1;CCL5;CCL7;CCL8;CD44;CD58;DAPK1;DAPK3;EPRS;GBP1;GBP2;GBP6;ICAM1;IFNGR2;IRF1;IRF2;IRF6;IRF7;MID1;NCAM1;OAS1;OAS2;OAS3;PDE12;PML;PRKCD;SLC26A6;SP100;TDGF1;TRIM21;TRIM22;TRIM34;TRIM68;WNT5A
Natural killer cell mediated cytotoxicity	22	3	BRAF;CASP3;CSF2;FAS;FYN;GRB2;HCST;HLA-A;HLA-B;HLA-C;HLA-E;HLA-G;IFNA1;IFNA10;IFNA13;IFNA14;IFNA16;IFNA17;IFNA2;IFNA21;IFNA4;IFNA5;IFNA6;IFNA7;IFNA8;IFNAR1;IFNAR2;IFNB1;IFNGR1;IFNGR2;KRAS;LCP2;MICA;MICB;NCR3;NRAS;PIK3R1;PIK3R2;PIK3R3;PLCG2;PPP3CC;PPP3R2;PTK2B;RAC2;RAC3;SH2D1A;SH3BP2;TNF;TNFRSF10A;TNFRSF10B;TYROBP
Factors involved in megakaryocyte development and platelet production_Homo sapiens_R-HSA-983231	30	3	AK3;AKAP10;CABLES1;CAPZA2;CAPZB;CBX5;CDC42;CDK2;CDK5;DOCK1;DOCK3;DOCK4;DOCK5;DOCK6;DOCK8;DOCK9;EHD1;EHD3;GATA4;GATA6;H3F3A;HBB;HBD;HBE1;HBG1;HBG2;HDAC1;HDAC2;HIST1H3A;HMG20B;IFNA1;IFNA10;IFNA14;IFNA16;IFNA17;IFNA2;IFNA21;IFNA4;IFNA5;IFNA6;IFNA7;IFNA8;IFNB1;IRF1;IRF7;ITPK1;JAK2;KDM1A;KIF11;KIF12;KIF13B;KIF18A;KIF18B;KIF19;KIF1A;KIF20B;KIF26A;KIF27;KIF2C;KIF3A;KIF5A;KIF9;KLC1;KLC2;LRRC16A;MAFG;MYB;…
regulation of transcription, DNA-templated (GO:0006355)	39	3	AATF;ABCG1;ACTL6A;ACVR1;ADIPOQ;AES;AFAP1L2;AHR;AIRE;AJUBA;AKT1;ALX1;ANKRA2;ANKRD30A;APBB2;APOE;ARHGAP35;ARHGEF11;ARID1A;ARID5A;ARID5B;ARNT;ARNT2;ARNTL2;ASCC1;ASH2L;ATF2;ATF4;ATF5;ATF6;ATF7IP;ATMIN;ATOH8;ATP1B4;ATP8B1;ATXN1;AXIN1;BACH1;BAMBI;BARHL2;BARX1;BATF;BAZ2B;BCL10;BCL11A;BCL11B;BCL3;BCL6;BCOR;BEND5;BHLHE40;BHLHE41;BIRC5;BLM;BMP10;BMP2;BMP7;BPTF;BRCA1;BRCA2;BRD4;BRDT;BRF2;BRIP1;BRWD1;BTBD8;B…
G-protein coupled chemoattractant receptor activity (GO:0001637)	40	3	ACKR2;ACKR4;CCR1;CCR2;CCR3;CCR4;CCR5;CCR6;CCR8;CCR9;CMKLR1;CX3CR1;CXCR1;CXCR3;GPR17
Influenza A	48	3	ACTG1;AGFG1;CASP1;CXCL10;CYCS;DDX39B;DDX58;EIF2AK3;EIF2S1;EP300;FAS;GSK3B;HLA-DQA1;HLA-DQB1;HLA-DRA;HLA-DRB1;HLA-DRB5;HSPA1A;HSPA1B;HSPA1L;HSPA2;IFNA1;IFNA10;IFNA13;IFNA14;IFNA16;IFNA17;IFNA2;IFNA21;IFNA4;IFNA5;IFNA6;IFNA7;IFNA8;IFNB1;IFNGR1;IL18;IL1A;IL1B;IL33;IVNS1ABP;JAK2;JUN;KPNA1;KPNA2;MAP2K6;MAPK9;NFKB1;NLRX1;PRSS1;PRSS3;RELA;SOCS3;STAT2;TMPRSS13;TMPRSS4;TNF;TNFRSF10A;TNFRSF10B;VDAC1
MHC protein complex (GO:0042611)	58	3	CD74;HLA-A;HLA-B;HLA-C;HLA-DMA;HLA-DMB;HLA-DOA;HLA-DOB;HLA-DPA1;HLA-DPB1;HLA-DQA1;HLA-DQB1;HLA-DQB2;HLA-DRA;HLA-DRB1;HLA-DRB5;HLA-E
positive regulation of GTPase activity (GO:0043547)	61	3	ABR;ADPRHL1;ALS2;ARHGAP21;ARHGAP23;ARHGAP27;ARHGEF10;ARHGEF38;ARHGEF7;BCAS3;CCDC125;CCL1;CCL11;CCL13;CCL14;CCL15;CCL16;CCL17;CCL18;CCL19;CCL2;CCL20;CCL21;CCL22;CCL23;CCL24;CCL25;CCL26;CCL3;CCL3L1;CCL4;CCL4L1;CCL5;CCL7;CCL8;CCR7;CORO1C;CX3CL1;DNMBP;DOCK10;DOCK11;DOCK7;DOCK8;DOCK9;DVL3;ECT2;ERBB2;EVI5;EVI5L;F11R;F2R;F2RL1;FOXJ1;FZD10;GNB5;GPR65;GRTP1;HRAS;ITGA6;ITGB1;LIMS1;NDEL1;NET1;NF1;NTRK1;PIN1…
cellular response to tumor necrosis factor (GO:0071356)	62	3	ADAM17;ADAMTS7;AIM2;AKT1;ARHGEF2;BAG4;BRCA1;CACTIN;CARD14;CCL1;CCL11;CCL13;CCL14;CCL15;CCL16;CCL17;CCL18;CCL19;CCL2;CCL20;CCL21;CCL22;CCL23;CCL24;CCL25;CCL26;CCL3;CCL3L1;CCL4;CCL4L1;CCL5;CCL7;CCL8;CD40LG;CD58;CD70;CDIP1;CHUK;CIB1;COMMD7;CRHBP;CX3CL1;DAB2IP;EDA2R;EDAR;GATA3;GBA;GPER1;IKBKB;INPP5K;LIMS1;NFE2L2;NGFR;NKX3-1;NPNT;PID1;PLVAP;PSMA2;PSMA4;PSMA5;PSMA7;PSMA8;PSMB1;PSMB2;PSMB3;PSMB4;PSMB6;P…
Xenobiotics_Homo sapiens_R-HSA-211981	65	3	CYP1A1;CYP1A2;CYP2A13;CYP2A6;CYP2A7;CYP2B6;CYP2F1;CYP2S1;CYP3A4;CYP3A43;CYP3A5;CYP3A7
Viral carcinogenesis	66	3	ACTN1;ACTN4;ATF2;ATF4;ATF6B;ATP6V0D1;ATP6V0D2;BAK1;CASP3;CASP8;CCNA2;CCND1;CCND2;CCND3;CCNE1;CCNE2;CCR3;CCR4;CCR5;CCR8;CDK2;CDK4;CDKN1A;CDKN1B;CDKN2A;CDKN2B;CHD4;CREB1;CREB3;CREB3L2;CREB5;DLG1;EGR3;EP300;GRB2;GSN;GTF2A1;GTF2E1;GTF2E2;GTF2H1;GTF2H4;H2BFM;H2BFWT;HDAC10;HDAC11;HDAC3;HDAC4;HDAC5;HDAC7;HDAC8;HIST1H2BA;HIST1H2BB;HIST1H2BC;HIST1H2BD;HIST1H2BE;HIST1H2BF;HIST1H2BG;HIST1H2BH;HIST1H2BI;HIST…
G alpha (i) signalling events_Homo sapiens_R-HSA-418594	78	3	ACKR3;ADCY5;ADCY8;ADRA2A;ADRA2B;ADRA2C;APLNR;C3;C3AR1;CASR;CCL16;CCL20;CCL23;CCL25;CCL28;CCL5;CCR10;CCR4;CCR7;CHRM2;CHRM4;CNR1;CXCL1;CXCL10;CXCL11;CXCL13;CXCL16;CXCL2;CXCL3;CXCL5;CXCL6;CXCL9;CXCR1;CXCR2;CXCR4;DRD3;FPR1;FPR2;FPR3;GAL;GALR2;GNAZ;GNB3;GNB4;GNG10;GNG13;GNG2;GNG3;GNG7;GNGT2;GPR55;GRM8;HEBP1;HRH3;HRH4;HTR1A;HTR1F;HTR5A;KNG1;LPAR1;LPAR5;MCHR2;NMS;NMU;NMUR1;NMUR2;NPB;NPBWR1;NPBWR2;NPW;NP…
alpha-Linolenic acid metabolism	82	3	JMJD7-PLA2G4B;PLA2G12A;PLA2G2A;PLA2G2C;PLA2G2D;PLA2G2E;PLA2G2F;PLA2G3;PLA2G4A;PLA2G4B;PLA2G4C;PLA2G4D;PLA2G4E;PLA2G4F;PLA2G5;PLB1
integral component of lumenal side of endoplasmic reticulum membrane (GO:0071556)	92	3	BCAP31;CALR;CANX;CD74;HFE;HLA-A;HLA-B;HLA-C;HLA-DPA1;HLA-DPB1;HLA-DQA1;HLA-DQA2;HLA-DQB1;HLA-DQB2;HLA-DRA;HLA-DRB1;HLA-DRB5;HLA-E;HLA-F;HLA-G;PKD2;SPPL2A;SPPL2C;TAPBP
regulation of leukocyte chemotaxis (GO:0002688)	93	3	ADAM17;CXCL1;CXCL10;CXCL11;CXCL13;CXCL2;CXCL3;CXCL5;CXCL6;CXCL9;IL6;LYN;MTUS1;PF4;PF4V1;PPBP;PTK2B;SLC8B1;SLIT2
zinc ion homeostasis (GO:0055069)	95	3	ATP13A2;MT1A;MT1B;MT1E;MT1F;MT1G;MT1H;MT1M;MT1X;MT2A;MT3;MT4;SLC30A5;SLC30A8;SLC39A5;SLC39A8;TMC8
Human papillomavirus infection	99	3	APC;ATM;ATP6V0A1;ATP6V0A4;ATP6V0D1;ATP6V0E2;ATP6V1A;ATP6V1C1;ATP6V1D;ATP6V1E1;ATP6V1G1;ATP6V1G2;ATP6V1G3;ATR;BAK1;CCND1;CCND2;CCND3;CDK2;CDK4;CDKN1A;CHAD;CHD4;COL1A1;COL1A2;COL2A1;COL4A1;COL4A2;COL4A3;COL4A4;COL6A3;COL6A5;COL6A6;COL9A1;COMP;CREB1;CREB3;CREB3L2;CREB5;CSNK1A1;CSNK1A1L;CTNNB1;DLG1;DVL3;EP300;FADD;FAS;FOXO1;FZD2;FZD3;FZD5;FZD6;FZD7;GRB2;GSK3B;HES1;HES6;HLA-A;HLA-B;HLA-C;HLA-E;HLA-F;H…
Allograft rejection	107	3	CD28;CD40LG;CD80;CD86;FAS;HLA-A;HLA-B;HLA-C;HLA-DMA;HLA-DMB;HLA-DOA;HLA-DOB;HLA-DPA1;HLA-DPB1;HLA-DQA1;HLA-DQA2;HLA-DQB1;HLA-DRA;HLA-DRB1;HLA-DRB5;HLA-E;HLA-F;HLA-G;IL12A;IL12B;IL2;IL4;IL5;TNF
Graft-versus-host disease	111	3	CD28;CD80;CD86;FAS;HLA-A;HLA-B;HLA-C;HLA-DMA;HLA-DMB;HLA-DOA;HLA-DOB;HLA-DPA1;HLA-DPB1;HLA-DQA1;HLA-DQA2;HLA-DQB1;HLA-DRA;HLA-DRB1;HLA-DRB5;HLA-E;HLA-F;HLA-G;IL1A;IL1B;IL2;IL6;KLRC1;KLRD1;TNF
Condensation of Prophase Chromosomes_Homo sapiens_R-HSA-2299718	111	3	CDK1;H2AFX;H2AFZ;H3F3A;HIST1H2AB;HIST1H2AC;HIST1H2AD;HIST1H2AJ;HIST1H2BA;HIST1H2BB;HIST1H2BC;HIST1H2BD;HIST1H2BH;HIST1H2BK;HIST1H2BL;HIST1H2BM;HIST1H2BN;HIST1H2BO;HIST1H3A;HIST1H4A;HIST2H2AA3;HIST2H2AC;HIST2H2BE;HIST2H3A;HIST3H2BB;HIST3H3;MCPH1;NCAPG2;NCAPH2;PHF8;PLK1;RB1;SET;SETD8;SMC2;SMC4
Type I diabetes mellitus	115	3	CD28;CD80;CD86;CPE;FAS;HLA-A;HLA-B;HLA-C;HLA-DMA;HLA-DMB;HLA-DOA;HLA-DOB;HLA-DPA1;HLA-DPB1;HLA-DQA1;HLA-DQA2;HLA-DQB1;HLA-DRA;HLA-DRB1;HLA-DRB5;HLA-E;HLA-F;HLA-G;IL12A;IL12B;IL1A;IL1B;IL2;INS;LTA;PTPRN;PTPRN2;TNF
Defensins_Homo sapiens_R-HSA-1461973	122	3	ART1;CCR6;CD4;DEFA1;DEFA3;DEFA4;DEFA5;DEFA6;DEFB1;DEFB103A;DEFB104A;DEFB105A;DEFB106A;DEFB107A;DEFB108B;DEFB110;DEFB112;DEFB113;DEFB114;DEFB115;DEFB116;DEFB118;DEFB119;DEFB121;DEFB123;DEFB124;DEFB125;DEFB127;DEFB129;DEFB130;DEFB131;DEFB132;DEFB133;DEFB134;DEFB135;DEFB136;DEFB4A;PRSS3;TLR1;TLR2
Deposition of new CENPA-containing nucleosomes at the centromere_Homo sapiens_R-HSA-606279	131	3	APITD1;CENPC;CENPH;CENPI;CENPK;CENPL;CENPM;CENPN;CENPP;CENPQ;CENPT;CENPU;CENPW;H2AFX;H2AFZ;HIST1H2AB;HIST1H2AC;HIST1H2AD;HIST1H2AJ;HIST1H2BA;HIST1H2BB;HIST1H2BC;HIST1H2BD;HIST1H2BH;HIST1H2BK;HIST1H2BL;HIST1H2BM;HIST1H2BN;HIST1H2BO;HIST1H4A;HIST2H2AA3;HIST2H2AC;HIST2H2BE;HIST3H2BB;HJURP;ITGB3BP;MIS18A;NPM1;RBBP7;RSF1;RUVBL1;SMARCA5;STRA13
Nucleosome assembly_Homo sapiens_R-HSA-774815	131	3	APITD1;CENPC;CENPH;CENPI;CENPK;CENPL;CENPM;CENPN;CENPP;CENPQ;CENPT;CENPU;CENPW;H2AFX;H2AFZ;HIST1H2AB;HIST1H2AC;HIST1H2AD;HIST1H2AJ;HIST1H2BA;HIST1H2BB;HIST1H2BC;HIST1H2BD;HIST1H2BH;HIST1H2BK;HIST1H2BL;HIST1H2BM;HIST1H2BN;HIST1H2BO;HIST1H4A;HIST2H2AA3;HIST2H2AC;HIST2H2BE;HIST3H2BB;HJURP;ITGB3BP;MIS18A;NPM1;RBBP7;RSF1;RUVBL1;SMARCA5;STRA13
extracellular ligand-gated ion channel activity (GO:0005230)	133	3	CHRFAM7A;CHRNA1;CHRNA10;CHRNA2;CHRNA4;CHRNA6;CHRNA7;CHRNA9;CHRNB1;CHRNB3;CHRND;CHRNE;CHRNG;GABRA1;GABRA2;GABRA3;GABRA4;GABRA5;GABRA6;GABRB1;GABRB2;GABRB3;GABRD;GABRE;GABRG1;GABRG2;GABRG3;GABRP;GABRQ;GABRR2;GLRA1;GLRA3;GLRA4;GLRB;GRIA1;GRIA2;GRIA3;GRIA4;HTR3A;HTR3B;HTR3C;HTR3D;HTR3E;TRPV1;ZACN
RNA Polymerase I Chain Elongation_Homo sapiens_R-HSA-73777	138	3	CBX3;CCNH;CD3EAP;CDK7;ERCC2;ERCC3;GTF2H1;GTF2H2;GTF2H4;H2AFX;H2AFZ;H3F3A;HIST1H2AB;HIST1H2AC;HIST1H2AD;HIST1H2AJ;HIST1H2BA;HIST1H2BB;HIST1H2BC;HIST1H2BD;HIST1H2BH;HIST1H2BK;HIST1H2BL;HIST1H2BM;HIST1H2BN;HIST1H2BO;HIST1H3A;HIST1H4A;HIST3H2BB;MNAT1;POLR1A;POLR1B;POLR1C;POLR1D;POLR1E;POLR2F;POLR2H;POLR2L;TAF1A;TAF1B;UBTF;ZNRD1
Telomere Maintenance_Homo sapiens_R-HSA-157579	140	3	ACD;FEN1;H2AFX;H2AFZ;HIST1H2AB;HIST1H2AC;HIST1H2AD;HIST1H2AJ;HIST1H2BA;HIST1H2BB;HIST1H2BC;HIST1H2BD;HIST1H2BH;HIST1H2BK;HIST1H2BL;HIST1H2BM;HIST1H2BN;HIST1H2BO;HIST1H4A;HIST3H2BB;HIST3H3;LIG1;PCNA;POLA1;POLA2;POLD1;POLD2;POLD3;POLD4;POT1;PRIM1;RFC2;RFC3;RFC4;RUVBL1;RUVBL2;TERF2IP;TERT
RHO GTPases activate PKNs_Homo sapiens_R-HSA-5625740	142	3	CDC25C;H2AFX;H2AFZ;H3F3A;HIST1H2AB;HIST1H2AC;HIST1H2AD;HIST1H2AJ;HIST1H2BA;HIST1H2BB;HIST1H2BC;HIST1H2BD;HIST1H2BH;HIST1H2BK;HIST1H2BL;HIST1H2BM;HIST1H2BN;HIST1H2BO;HIST1H3A;HIST1H4A;HIST3H2BB;KDM4C;KLK2;KLK3;MYH11;MYH14;MYH9;MYL12B;MYL6;PKN1;PKN3;PPP1CB;PPP1R12A;PPP1R12B;RHOA;RHOB;YWHAG;YWHAQ
cellular response to type I interferon (GO:0071357)	150	3	BST2;HFE;HLA-A;HLA-B;HLA-C;HLA-E;HLA-F;HLA-G;IFIT1;IFIT2;IFIT3;IFNA1;IFNA10;IFNA14;IFNA16;IFNA17;IFNA2;IFNA21;IFNA4;IFNA5;IFNA6;IFNA7;IFNA8;IFNAR1;IFNAR2;IFNB1;IP6K2;IRF1;IRF2;IRF3;IRF8;ISG20;MX1;MX2;SP100;STAT2
type I interferon signaling pathway (GO:0060337)	150	3	BST2;HFE;HLA-A;HLA-B;HLA-C;HLA-E;HLA-F;HLA-G;IFIT1;IFIT2;IFIT3;IFNA1;IFNA10;IFNA14;IFNA16;IFNA17;IFNA2;IFNA21;IFNA4;IFNA5;IFNA6;IFNA7;IFNA8;IFNAR1;IFNAR2;IFNB1;IP6K2;IRF1;IRF2;IRF3;IRF8;ISG20;MX1;MX2;SP100;STAT2
Interferon alpha/beta signaling_Homo sapiens_R-HSA-909733	152	3	BST2;HLA-A;HLA-B;HLA-C;HLA-E;HLA-F;HLA-G;IFIT1;IFIT2;IFIT3;IFNA1;IFNA10;IFNA14;IFNA16;IFNA17;IFNA2;IFNA21;IFNA4;IFNA5;IFNA6;IFNA7;IFNA8;IFNAR1;IFNAR2;IFNB1;IP6K2;IRF1;IRF2;IRF3;IRF8;ISG20;MX1;MX2;SOCS3;STAT2
Transcriptional regulation by small RNAs_Homo sapiens_R-HSA-5578749	157	3	AAAS;AGO1;H2AFX;H2AFZ;H3F3A;HIST1H2AB;HIST1H2AC;HIST1H2AD;HIST1H2AJ;HIST1H2BA;HIST1H2BB;HIST1H2BC;HIST1H2BD;HIST1H2BH;HIST1H2BK;HIST1H2BL;HIST1H2BM;HIST1H2BN;HIST1H2BO;HIST1H3A;HIST1H4A;HIST3H2BB;IPO8;NUP153;NUP155;NUP160;NUP188;NUP205;NUP214;NUP35;NUP50;NUP62;NUP85;NUP98;NUPL2;POLR2C;POLR2D;POLR2F;POLR2G;POLR2H;POLR2J;POLR2L;POM121;POM121C;RANBP2
cytokine receptor activity (GO:0004896)	160	3	ACKR2;ACKR4;CCR1;CCR2;CCR3;CCR4;CCR5;CCR6;CCR8;CCR9;CD74;CMKLR1;CNTFR;CRLF2;CSF2RB;CX3CR1;CXCR1;CXCR3;EBI3;EPOR;FLT3;GFRA1;GFRA2;GFRA4;GFRAL;GPR17;IFNGR1;IFNLR1;IL10RA;IL12RB2;IL13RA2;IL15RA;IL17RA;IL17RB;IL17RC;IL17RD;IL17RE;IL1R1;IL1R2;IL1RAPL2;IL1RL1;IL1RL2;IL20RA;IL20RB;IL22RA1;IL22RA2;IL23R;IL2RA;IL2RG;IL31RA;IL3RA;IL5RA;IL6R;IL6ST;IL7R;LEPR;LIFR;MPL;OSMR;PRLR
Senescence-Associated Secretory Phenotype (SASP)_Homo sapiens_R-HSA-2559582	163	3	ANAPC1;ANAPC11;ANAPC15;ANAPC16;ANAPC2;ANAPC5;ANAPC7;CCNA1;CCNA2;CDC16;CDC23;CDC26;CDC27;CDK2;CDK4;CDK6;CDKN1A;CDKN1B;CDKN2A;CDKN2B;CEBPB;EHMT1;EHMT2;FOS;H2AFX;H2AFZ;H3F3A;HIST1H2AB;HIST1H2AC;HIST1H2AD;HIST1H2AJ;HIST1H2BA;HIST1H2BB;HIST1H2BC;HIST1H2BD;HIST1H2BH;HIST1H2BK;HIST1H2BL;HIST1H2BM;HIST1H2BN;HIST1H2BO;HIST1H3A;HIST1H4A;HIST2H2AA3;HIST2H2AC;HIST2H2BE;HIST2H3A;HIST3H2BB;IGFBP7;IL1A;IL6;MAPK…
Activation of anterior HOX genes in hindbrain development during early embryogenesis_Homo sapiens_R-HSA-5617472	178	3	CTCF;EP300;EZH2;H2AFX;H2AFZ;H3F3A;HDAC3;HIST1H2AB;HIST1H2AC;HIST1H2AD;HIST1H2AJ;HIST1H2BA;HIST1H2BB;HIST1H2BC;HIST1H2BD;HIST1H2BH;HIST1H2BK;HIST1H2BL;HIST1H2BM;HIST1H2BN;HIST1H2BO;HIST1H3A;HIST1H4A;HIST3H2BB;HOXA1;HOXA2;HOXA3;HOXA4;HOXB1;HOXB2;HOXB3;HOXB4;HOXC4;HOXD1;HOXD3;HOXD4;KMT2C;KMT2D;MEIS1;PAX6;PAXIP1;PBX1;PCGF2;POLR2C;POLR2D;POLR2F;POLR2G;POLR2H;POLR2J;POLR2L;RARA;RARB;RARG;RQCD1;RXRA;SUZ…
Activation of HOX genes during differentiation_Homo sapiens_R-HSA-5619507	178	3	CTCF;EP300;EZH2;H2AFX;H2AFZ;H3F3A;HDAC3;HIST1H2AB;HIST1H2AC;HIST1H2AD;HIST1H2AJ;HIST1H2BA;HIST1H2BB;HIST1H2BC;HIST1H2BD;HIST1H2BH;HIST1H2BK;HIST1H2BL;HIST1H2BM;HIST1H2BN;HIST1H2BO;HIST1H3A;HIST1H4A;HIST3H2BB;HOXA1;HOXA2;HOXA3;HOXA4;HOXB1;HOXB2;HOXB3;HOXB4;HOXC4;HOXD1;HOXD3;HOXD4;KMT2C;KMT2D;MEIS1;PAX6;PAXIP1;PBX1;PCGF2;POLR2C;POLR2D;POLR2F;POLR2G;POLR2H;POLR2J;POLR2L;RARA;RARB;RARG;RQCD1;RXRA;SUZ…
regulation of cytokine-mediated signaling pathway (GO:0001959)	180	3	AGPAT1;CD74;CLIP3;ELF1;IFNA1;IFNA10;IFNA14;IFNA16;IFNA17;IFNA2;IFNA21;IFNA4;IFNA5;IFNA6;IFNA7;IFNA8;IFNAR1;IFNAR2;IFNB1;IFNGR1;IFNGR2;IL3;JAK2;LIFR;PALM3;RBCK1;RIPK1;RUNX1;SOCS3;SPHK1;STAT2;TAX1BP1;TNF;TNFAIP3;TRIM44;TSLP;UBA52
flavonoid glucuronidation (GO:0052696)	1	2	UGT1A1;UGT1A10;UGT1A4;UGT1A6;UGT1A7;UGT1A8
salt transmembrane transporter activity (GO:1901702)	1	2	SLC17A3;SLC22A10;SLC22A11;SLC22A12;SLC22A24;SLC22A25;SLC22A6;SLC22A9;SLC2A9
urate transmembrane transporter activity (GO:0015143)	1	2	SLC17A3;SLC22A10;SLC22A11;SLC22A12;SLC22A24;SLC22A25;SLC22A6;SLC22A9;SLC2A9
cellular divalent inorganic cation homeostasis (GO:0072503)	3	2	ATP2B1;ATP2C2;CASR;CCL1;CCL11;CCL13;CCL14;CCL15;CCL23;CCL3;CCL5;CCL7;CCL8;CHRNA7;DRD4;DRD5;GCM2;HTR2A;HTR2B;MT1A;MT1B;MT1E;MT1F;MT1G;MT1H;MT1M;MT1X;MT2A;MT3;MT4;RGN;SLC24A2;SLC39A13;SLC39A8;STIM1;TPT1
detection of chemical stimulus involved in sensory perception (GO:0050907)	4	2	OR4E2;OR4K1;OR4K13;OR4K14;OR4K15;OR4K17;OR4K2;OR4K5;OR4L1;OR4M1;OR4N2;OR4N5;OR4Q3
HATs acetylate histones_Homo sapiens_R-HSA-3214847	8	2	ACTL6A;ATXN7;ATXN7L3;BRD1;BRD8;BRPF3;CSRP2BP;ELP3;ELP6;ENY2;EP300;HIST1H2AA;HIST1H2AB;HIST1H2AC;HIST1H2AD;HIST1H2AG;HIST1H2AH;HIST1H2AJ;HIST1H2BA;HIST1H2BB;HIST1H2BC;HIST1H2BD;HIST1H2BH;HIST1H2BK;HIST1H2BL;HIST1H2BM;HIST1H2BN;HIST1H2BO;HIST1H3A;HIST1H4A;HIST3H2A;HIST3H2BB;IKBKAP;ING4;ING5;JADE2;KANSL1;KANSL2;KAT2A;KAT7;MCRS1;MEAF6;MSL1;MSL2;RUVBL1;SAP130;SUPT20H;TADA2A;WDR5;YEATS2
Mitotic Prophase_Homo sapiens_R-HSA-68875	8	2	AAAS;ARPP19;CDK1;CNEP1R1;CTDNEP1;EMD;ENSA;H2AFZ;H3F3A;HIST1H2AB;HIST1H2AC;HIST1H2AD;HIST1H2AJ;HIST1H2BA;HIST1H2BB;HIST1H2BC;HIST1H2BD;HIST1H2BH;HIST1H2BK;HIST1H2BL;HIST1H2BM;HIST1H2BN;HIST1H2BO;HIST1H3A;HIST1H4A;HIST2H2AA3;HIST2H2AC;HIST2H2BE;HIST2H3A;HIST3H2BB;HIST3H3;LMNB1;LPIN3;MAPK3;MCPH1;NCAPG2;NEK6;NEK7;NUP153;NUP155;NUP160;NUP205;NUP210;NUP37;NUP43;NUP54;NUP62;NUP85;NUP93;NUPL2;PHF8;PLK1;P…
regulation of triglyceride catabolic process (GO:0010896)	11	2	APOA1;APOA4;APOA5;APOC2;APOC3
benzodiazepine receptor activity (GO:0008503)	11	2	GABRA1;GABRA2;GABRA3;GABRA4;GABRA5;GABRA6;GABRE;GABRG1;GABRG2;GABRG3
CYP2E1 reactions_Homo sapiens_R-HSA-211999	11	2	CYP2A13;CYP2A6;CYP2A7;CYP2B6;CYP2F1;CYP2S1
positive regulation of transcription, DNA-templated (GO:0045893)	13	2	AATF;ABRA;ACVRL1;AFAP1L2;AGT;AHR;AHRR;AKAP8L;ALX1;ALYREF;ARF4;ARNT;ARNTL2;ATF1;ATF3;ATF4;ATF5;ATF7IP;ATMIN;ATOH8;ATXN7L3;BCL11B;BCL2L12;BLM;BMP4;BMP6;BRCA1;BRCA2;BRD4;CALCOCO1;CAMKK2;CAPRIN2;CCDC62;CCNE1;CCNK;CD38;CD74;CDH13;CDK12;CDK7;CDK8;CDKN2B;CDX1;CEBPA;CEBPB;CEBPE;CEBPG;CEP290;CHCHD2;CITED4;CKAP2;CLOCK;COL1A1;COPS5;CREB3L4;CREBL2;CREBRF;CRLF3;CRTC1;CRTC2;CRTC3;CRX;CSF3;CSRNP2;CTBP2;DAB2;DBP…
cytidine to uridine editing (GO:0016554)	18	2	AICDA;APOBEC1;APOBEC3A;APOBEC3B;APOBEC3C;APOBEC3D;APOBEC3F;APOBEC3G;APOBEC3H
regulation of cholesterol esterification (GO:0010872)	18	2	APOA1;APOA4;APOA5;APOC1;APOE;LAMTOR1
synaptic transmission, GABAergic (GO:0051932)	18	2	GABRA1;GABRA2;GABRA3;GABRA4;GABRA6;GABRB2;GABRE;GABRG1;GABRG2
Eicosanoids_Homo sapiens_R-HSA-211979	18	2	CYP4A11;CYP4A22;CYP4B1;CYP4F11;CYP4F12;CYP4F2;CYP4F22;CYP4F3
phospholipid efflux (GO:0033700)	21	2	APOA1;APOA4;APOA5;APOC1;APOC2;APOC3;APOE
GABA-gated chloride ion channel activity (GO:0022851)	21	2	GABRA1;GABRA2;GABRA3;GABRA4;GABRA5;GABRA6;GABRB1;GABRB3;GABRE;GABRG1;GABRG2;GABRG3
GABA A receptor activation_Homo sapiens_R-HSA-977441	21	2	GABRA1;GABRA2;GABRA3;GABRA4;GABRA5;GABRA6;GABRB1;GABRB2;GABRB3;GABRG2;GABRG3;GABRQ
MHC class II protein complex (GO:0042613)	34	2	CD74;HLA-DMA;HLA-DMB;HLA-DOA;HLA-DOB;HLA-DPA1;HLA-DPB1;HLA-DQA1;HLA-DQB1;HLA-DQB2;HLA-DRA;HLA-DRB1;HLA-DRB5
inhibitory extracellular ligand-gated ion channel activity (GO:0005237)	40	2	GABRA1;GABRA2;GABRA3;GABRA4;GABRA5;GABRA6;GABRE;GABRG1;GABRG2;GABRG3;GLRA1;GLRA4;GLRB
purinergic nucleotide receptor activity (GO:0001614)	40	2	GPR171;GPR34;GPR87;P2RX2;P2RX3;P2RX4;P2RX6;P2RX7;P2RY1;P2RY12;P2RY13;P2RY14;PTAFR
Acyl chain remodelling of PI_Homo sapiens_R-HSA-1482922	40	2	PLA2G12A;PLA2G2A;PLA2G2D;PLA2G2E;PLA2G2F;PLA2G4A;PLA2G4C;PLA2G4D;PLA2G4E;PLA2G4F;PLA2G5
Cellular Senescence_Homo sapiens_R-HSA-2559583	42	2	ACD;AGO1;AGO3;AGO4;ANAPC1;ANAPC11;ANAPC15;ANAPC2;ATM;CABIN1;CBX2;CBX4;CBX6;CBX8;CDC16;CDC23;CDC26;CDC27;CDK2;CDK4;CDKN1A;CDKN2A;CDKN2B;E2F3;EHMT1;EHMT2;ETS2;EZH2;FOS;H1F0;H2AFX;H2AFZ;H3F3A;HIRA;HIST1H1A;HIST1H1B;HIST1H1C;HIST1H1D;HIST1H1E;HIST1H2AB;HIST1H2AC;HIST1H2AD;HIST1H2AJ;HIST1H2BA;HIST1H2BB;HIST1H2BC;HIST1H2BD;HIST1H2BH;HIST1H2BK;HIST1H2BL;HIST1H2BM;HIST1H2BN;HIST1H2BO;HIST1H3A;HIST1H4A;HI…
Hepatitis B	44	2	ATF6B;BIRC5;BRAF;CASP12;CDK2;CREB3;CREB3L2;CREB5;CYCS;DDX58;EGR3;FADD;FAS;GRB2;IFNA1;IFNA10;IFNA13;IFNA14;IFNA16;IFNA17;IFNA2;IFNA21;IFNA4;IFNA5;IFNA6;IFNA7;IFNA8;IFNB1;JAK2;MAP2K6;MAP3K7;PTK2B;RB1;RELA;STAT2;STAT6;TGFBR1;TICAM2;TNF
Acyl chain remodelling of PG_Homo sapiens_R-HSA-1482925	47	2	LPCAT4;PLA2G12A;PLA2G2A;PLA2G2D;PLA2G2E;PLA2G2F;PLA2G3;PLA2G4A;PLA2G4B;PLA2G4D;PLA2G4F;PLA2G5
Acyl chain remodelling of PS_Homo sapiens_R-HSA-1482801	47	2	LPCAT4;PLA2G12A;PLA2G2A;PLA2G2D;PLA2G2E;PLA2G2F;PLA2G4A;PLA2G4B;PLA2G4D;PLA2G4E;PLA2G4F;PLA2G5
Tuberculosis	51	2	ATP6V0A4;CAMP;CYCS;CYP27B1;FADD;HLA-DQA1;HLA-DQB1;HLA-DRA;HLA-DRB1;HLA-DRB5;IFNA1;IFNA10;IFNA13;IFNA14;IFNA16;IFNA17;IFNA2;IFNA21;IFNA4;IFNA5;IFNA6;IFNA7;IFNA8;IFNB1;IFNGR1;IL10RA;IL18;IL23A;JAK2;PPP3CC;PPP3R2;RAB5B;RELA;RFXAP;RHOA;SPHK1;TCIRG1;TLR9;TNF
arachidonic acid epoxygenase activity (GO:0008392)	52	2	CYP2A13;CYP2A6;CYP2A7;CYP2B6;CYP2F1;CYP2S1
arachidonic acid monooxygenase activity (GO:0008391)	52	2	CYP2A13;CYP2A6;CYP2A7;CYP2B6;CYP2F1;CYP2S1
Kaposi sarcoma-associated herpesvirus infection	55	2	CCND1;CDK4;CSF2;CYCS;FADD;FAS;GNG10;HLA-A;HLA-B;HLA-C;HLA-E;HLA-F;HLA-G;IFNA1;IFNA10;IFNA13;IFNA14;IFNA16;IFNA17;IFNA2;IFNA21;IFNA4;IFNA5;IFNA6;IFNA7;IFNA8;IFNB1;IFNGR1;JAK2;MAP2K6;MICA;MICB;PPP3CC;PPP3R2;RB1;RELA;STAT2
regulation of GTPase activity (GO:0043087)	57	2	ADAP1;ARHGAP1;ARHGAP23;BCAS3;CCL1;CCL11;CCL13;CCL14;CCL15;CCL16;CCL18;CCL2;CCL23;CCL3;CCL3L1;CCL4;CCL4L1;CCL5;CCL7;CCL8;ERBB2;FICD;FZD10;HRAS;PLXNB2;STMN3
phosphatidylglycerol acyl-chain remodeling (GO:0036148)	58	2	LPCAT4;PLA2G12A;PLA2G2A;PLA2G2D;PLA2G2E;PLA2G2F;PLA2G3;PLA2G4A;PLA2G4B;PLA2G4D;PLA2G4F;PLA2G5
ligand-gated anion channel activity (GO:0099095)	58	2	GABRA1;GABRA2;GABRA3;GABRA4;GABRA5;GABRA6;GABRB1;GABRB3;GABRE;GABRG1;GABRG2;GABRG3;GLRA1;GLRA4;GLRB
Peptide ligand-binding receptors_Homo sapiens_R-HSA-375276	61	2	ACKR2;ACKR3;ACKR4;AGTR1;ANXA1;APLN;APLNR;AVPR1B;C5;CCK;CCL1;CCL11;CCL16;CCL19;CCL2;CCL20;CCL21;CCL23;CCL27;CCL28;CCL3;CCL3L1;CCL4;CCL5;CCL7;CCR1;CCR10;CCR2;CCR3;CCR4;CCR5;CCR6;CCR7;CCR8;CCR9;CCRL2;CX3CR1;CXCL1;CXCL10;CXCL11;CXCL12;CXCL13;CXCL2;CXCL3;CXCL5;CXCL6;CXCL9;CXCR1;CXCR2;CXCR3;CXCR4;CXCR5;CXCR6;EDN1;EDNRA;EDNRB;F2;F2R;F2RL1;F2RL2;GALR1;GHRL;GHSR;GPR37L1;GRPR;HCRT;HEBP1;KISS1;KISS1R;KNG1;M…
Interferon Signaling_Homo sapiens_R-HSA-913531	63	2	AAAS;DDX58;EIF4A3;EIF4E2;EIF4E3;EIF4G3;GBP1;GBP2;GBP3;GBP4;GBP5;GBP6;GBP7;HLA-A;HLA-B;HLA-C;HLA-DQA1;HLA-DQB1;HLA-DRA;HLA-DRB1;HLA-DRB5;HLA-E;HLA-F;HLA-G;IFIT1;IFIT2;IFIT3;IFNA1;IFNA10;IFNA14;IFNA16;IFNA17;IFNA2;IFNA21;IFNA4;IFNA5;IFNA6;IFNA7;IFNA8;IFNB1;IFNGR1;IRF1;JAK2;KPNA1;KPNA2;KPNA3;MT2A;NCAM1;NDC1;NUP155;NUP188;NUP205;NUP50;NUP54;NUP85;NUP93;PRKCD;RANBP2;SOCS3;SP100;STAT2;TPR;TRIM10;TRIM14…
GABA-A receptor complex (GO:1902711)	65	2	GABRA1;GABRA2;GABRA3;GABRA4;GABRA5;GABRA6;GABRB1;GABRB2;GABRB3;GABRE;GABRG1;GABRG2;GABRG3;GABRP;GABRQ
Epstein-Barr virus infection	66	2	BLNK;CCND1;CD3D;CD3E;CD3G;CDK2;CDK4;CYCS;DDX58;ENTPD1;FADD;FAS;HLA-A;HLA-B;HLA-C;HLA-DQA1;HLA-DQB1;HLA-DRA;HLA-DRB1;HLA-DRB5;HLA-E;HLA-F;HLA-G;IFNA1;IFNA10;IFNA13;IFNA14;IFNA16;IFNA17;IFNA2;IFNA21;IFNA4;IFNA5;IFNA6;IFNA7;IFNA8;IFNB1;MAP2K6;MAP3K7;PSMD1;PSMD6;RB1;RELA;SAP30;STAT2;TNF;TNFAIP3
Human immunodeficiency virus 1 infection	70	2	AKT2;AP1M1;APOBEC3A;APOBEC3B;APOBEC3C;APOBEC3D;APOBEC3F;APOBEC3G;APOBEC3H;BAX;BST2;CALM3;CALR;CASP3;CCNB1;CD3D;CD3E;CD3G;CFL1;FADD;FBXW11;GNAI2;GNG5;GNG8;IFNA1;IFNA10;IFNA13;IFNA14;IFNA16;IFNA17;IFNA2;IFNA21;IFNA4;IFNA5;IFNA6;IFNA7;IFNA8;IFNB1;IRF3;ITPR2;KRAS;LIMK2;NRAS;PAK4;PIK3R1;PIK3R2;PIK3R3;PLCG2;RAC2;RELA;RIPK1;RPS6KB2;TRAF6
Human T-cell leukemia virus 1 infection	71	2	ADCY1;ADCY2;ADCY3;ADCY5;ADCY6;ADCY8;AKT2;AKT3;ANAPC1;ANAPC10;ANAPC2;ANAPC4;ATF2;ATF4;ATF6B;ATR;B2M;BUB1B;CALR;CANX;CCNA2;CCND2;CCND3;CCNE1;CCNE2;CD3D;CD3E;CD3G;CD4;CDC16;CDC23;CDC26;CDC27;CDK2;CDK4;CDKN1A;CHEK2;CREB1;CREB3;CRTC1;CRTC3;CSF2;DLG1;E2F3;EGR1;EP300;ESPL1;ETS2;FOS;FOSL1;GPS2;HLA-A;HLA-B;HLA-C;HLA-DMA;HLA-DMB;HLA-DOA;HLA-DOB;HLA-DPA1;HLA-DPB1;HLA-DQA1;HLA-DQA2;HLA-DQB1;HLA-DRA;HLA-DRB1;…
phosphatidylserine acyl-chain remodeling (GO:0036150)	72	2	LPCAT4;OSBPL8;PLA1A;PLA2G12A;PLA2G2A;PLA2G2D;PLA2G2E;PLA2G2F;PLA2G4A;PLA2G4B;PLA2G4D;PLA2G4E;PLA2G4F;PLA2G5
Acyl chain remodelling of PE_Homo sapiens_R-HSA-1482839	74	2	LPCAT4;MBOAT2;PLA2G12A;PLA2G2A;PLA2G2D;PLA2G2E;PLA2G2F;PLA2G3;PLA2G4A;PLA2G4B;PLA2G4C;PLA2G4D;PLA2G4E;PLA2G4F;PLA2G5
Acyl chain remodelling of PC_Homo sapiens_R-HSA-1482788	82	2	LPCAT2;LPCAT4;MBOAT2;PLA2G12A;PLA2G2A;PLA2G2D;PLA2G2E;PLA2G2F;PLA2G3;PLA2G4A;PLA2G4B;PLA2G4C;PLA2G4D;PLA2G4E;PLA2G4F;PLA2G5;PLB1
inflammatory response (GO:0006954)	84	2	ADORA3;ALOX15;AOC3;APOL3;BDKRB2;BMP2;C5AR1;C5AR2;CCL1;CCL11;CCL13;CCL14;CCL15;CCL16;CCL17;CCL18;CCL19;CCL2;CCL20;CCL21;CCL22;CCL23;CCL24;CCL26;CCL3;CCL3L1;CCL4;CCL4L1;CCL5;CCL7;CCL8;CCR7;CCRL2;CD180;CD40LG;CD6;CRHBP;CRP;CX3CL1;CXCL13;CXCR2;CXCR4;DHX8;DLC1;EPHX2;F11R;F2R;FCGR2B;FOLR2;FOS;FPR1;FPR2;FPR3;GPR32;GPR68;HDAC4;HDAC5;HPR;HYAL1;HYAL3;IKBKB;IL10RB;IL18RAP;IL1A;IL1B;KLK1;KLK2;KLK3;KRT16;LGAL…
Ascorbate and aldarate metabolism	87	2	ALDH1B1;ALDH2;UGDH;UGT2A1;UGT2A2;UGT2A3;UGT2B10;UGT2B11;UGT2B15;UGT2B17;UGT2B28;UGT2B4;UGT2B7
phosphatidylcholine acyl-chain remodeling (GO:0036151)	89	2	DBI;LPCAT2;LPCAT4;MBOAT2;PLA2G12A;PLA2G2A;PLA2G2D;PLA2G2E;PLA2G2F;PLA2G3;PLA2G4A;PLA2G4B;PLA2G4C;PLA2G4D;PLA2G4E;PLA2G4F;PLA2G5;PLB1
Asthma	93	2	CCL11;CD40LG;HLA-DMA;HLA-DMB;HLA-DOA;HLA-DOB;HLA-DPA1;HLA-DPB1;HLA-DQA1;HLA-DQA2;HLA-DQB1;HLA-DRA;HLA-DRB1;HLA-DRB5;IL13;IL3;IL4;IL5;IL9;TNF
cellular zinc ion homeostasis (GO:0006882)	95	2	ATP13A2;MT1A;MT1B;MT1E;MT1F;MT1G;MT1H;MT1M;MT1X;MT2A;MT3;MT4;SLC30A5;SLC30A8;SLC39A8
Class A/1 (Rhodopsin-like receptors)_Homo sapiens_R-HSA-373076	96	2	ACKR2;ACKR3;ACKR4;ADORA1;ADORA2B;ADRA1A;ADRA1B;ADRA2A;ADRA2B;ADRB1;ADRB2;AGTR1;ANXA1;APLN;APLNR;AVPR1B;C5;CCK;CCL1;CCL11;CCL16;CCL19;CCL2;CCL20;CCL21;CCL23;CCL27;CCL28;CCL3;CCL3L1;CCL4;CCL5;CCL7;CCR1;CCR10;CCR2;CCR3;CCR4;CCR5;CCR6;CCR7;CCR8;CCR9;CCRL2;CGA;CHRM4;CHRM5;CNR1;CX3CR1;CXCL1;CXCL10;CXCL11;CXCL12;CXCL13;CXCL2;CXCL3;CXCL5;CXCL6;CXCL9;CXCR1;CXCR2;CXCR3;CXCR4;CXCR5;CXCR6;CYSLTR1;CYSLTR2;DRD…
Neuroactive ligand-receptor interaction	100	2	ADCYAP1R1;ADORA1;ADORA2A;ADRA1A;ADRA1B;ADRA1D;ADRA2A;ADRA2B;ADRA2C;ADRB1;ADRB2;ADRB3;AGT;AGTR1;APLN;APLNR;AVPR1B;AVPR2;BRS3;C3AR1;C5;C5AR1;CALCR;CALCRL;CCKAR;CGA;CHRM1;CHRM2;CHRM5;CHRNA1;CHRNA2;CHRNA4;CHRNA6;CHRNA7;CHRNB3;CHRND;CHRNG;CNR1;CNR2;CORT;CRH;CRHR2;CYSLTR2;DRD2;DRD3;DRD5;EDN1;EDNRA;F2;FPR1;FPR2;FPR3;GABBR1;GABBR2;GABRA1;GABRA2;GABRA4;GABRA5;GABRA6;GABRB1;GABRB2;GABRB3;GABRD;GABRE;GABRG1…
transmitter-gated ion channel activity (GO:0022824)	101	2	GABRA1;GABRA2;GABRA3;GABRA4;GABRA5;GABRA6;GABRB1;GABRB3;GABRE;GABRG1;GABRG2;GABRG3;GLRA3;GRIA1;GRIA2;GRIA3;GRIA4;GRID1;GRID2;GRIK2;GRIK4;GRIK5;GRIN2D;HTR3A;HTR3B;HTR3C;HTR3D;HTR3E;ZACN
Pentose and glucuronate interconversions	101	2	CRYL1;DCXR;ISPD;KL;RPEL1;SORD;UGDH;UGP2;UGT2A1;UGT2A2;UGT2A3;UGT2B10;UGT2B11;UGT2B15;UGT2B17;UGT2B28;UGT2B4;UGT2B7;XYLB
transmitter-gated ion channel activity involved in regulation of postsynaptic membrane potential (GO:1904315)	106	2	CHRNA2;CHRNA6;CHRNA7;CHRNA9;CHRNB1;CHRNB3;CHRND;CHRNE;CHRNG;GABRA1;GABRA2;GABRA3;GABRA4;GABRA5;GABRA6;GABRE;GABRG1;GABRG2;GABRG3;GRIA1;GRIA2;GRIA3;GRID2;GRIK1;GRIK5
Beta defensins_Homo sapiens_R-HSA-1461957	107	2	CCR6;DEFB1;DEFB103A;DEFB104A;DEFB105A;DEFB106A;DEFB107A;DEFB108B;DEFB110;DEFB112;DEFB113;DEFB114;DEFB115;DEFB116;DEFB118;DEFB119;DEFB121;DEFB123;DEFB124;DEFB125;DEFB127;DEFB129;DEFB130;DEFB131;DEFB132;DEFB133;DEFB134;DEFB135;DEFB136;DEFB4A;TLR1;TLR2
Nicotine addiction	110	2	CACNA1B;CHRNA4;CHRNA6;CHRNA7;GABRA1;GABRA2;GABRA3;GABRA4;GABRA5;GABRA6;GABRB1;GABRB2;GABRB3;GABRD;GABRE;GABRG1;GABRG2;GABRG3;GABRP;GABRQ;GABRR2;GRIA1;GRIA2;GRIA3;GRIA4;GRIN1;GRIN2B;GRIN2C;GRIN2D;GRIN3A;GRIN3B;SLC17A7;SLC32A1
calcium-dependent cell-cell adhesion via plasma membrane cell adhesion molecules (GO:0016339)	114	2	ATP2C1;CDH1;CDH10;CDH12;CDH15;CDH17;CDH18;CDH19;CDH2;CDH22;CDH23;CDH26;CDH3;CDH4;CDH6;CDH7;CDH8;CDH9;DSG1;NLGN1;PCDHB10;PCDHB11;PCDHB13;PCDHB14;PCDHB16;PCDHB2;PCDHB3;PCDHB4;PCDHB5;PCDHB6;PCDHGB4;PCDHGC3
Porphyrin and chlorophyll metabolism	114	2	ALAD;BLVRB;COX10;CPOX;FXN;MMAB;PPOX;UGT2A1;UGT2A2;UGT2A3;UGT2B10;UGT2B11;UGT2B15;UGT2B17;UGT2B28;UGT2B4;UGT2B7
Amine ligand-binding receptors_Homo sapiens_R-HSA-375280	115	2	ADRA1A;ADRA1B;ADRB2;CHRM2;CHRM5;DRD1;DRD2;DRD5;GPR143;HRH2;HRH3;HTR1D;HTR1E;HTR1F;HTR2A;HTR2B;HTR4;HTR5A;HTR6;HTR7;TAAR1;TAAR2;TAAR5;TAAR6;TAAR8
ERCC6 (CSB) and EHMT2 (G9a) positively regulate rRNA expression_Homo sapiens_R-HSA-427389	115	2	CBX3;CHD4;EHMT2;H2AFX;H2AFZ;H3F3A;HIST1H2AB;HIST1H2AC;HIST1H2AD;HIST1H2AJ;HIST1H2BA;HIST1H2BB;HIST1H2BC;HIST1H2BD;HIST1H2BH;HIST1H2BK;HIST1H2BL;HIST1H2BM;HIST1H2BN;HIST1H2BO;HIST1H3A;HIST1H4A;HIST3H2BB;TTF1
RMTs methylate histone arginines_Homo sapiens_R-HSA-3214858	119	2	ACTL6A;ARID2;CCND1;CDK4;COPRS;H2AFX;H2AFZ;HIST1H2AA;HIST1H2AB;HIST1H2AC;HIST1H2AD;HIST1H2AG;HIST1H2AH;HIST1H2AJ;HIST1H3A;HIST1H4A;HIST3H2A;JAK2;PBRM1;SMARCA2;SMARCB1;SMARCC1;SMARCC2;SMARCD1;SMARCD3;SMARCE1;WDR5
Ether lipid metabolism	122	2	GAL3ST1;JMJD7-PLA2G4B;LPCAT2;LPCAT4;PAFAH1B3;PAFAH2;PLA2G12A;PLA2G2A;PLA2G2C;PLA2G2D;PLA2G2E;PLA2G2F;PLA2G3;PLA2G4A;PLA2G4B;PLA2G4C;PLA2G4D;PLA2G4E;PLA2G4F;PLA2G5;PLB1;PLD3
Intestinal immune network for IgA production	123	2	AICDA;CCL28;CCR10;CCR9;CD28;CD40LG;CD80;CD86;CXCR4;HLA-DMA;HLA-DMB;HLA-DOA;HLA-DOB;HLA-DPA1;HLA-DPB1;HLA-DQA1;HLA-DQA2;HLA-DQB1;HLA-DRA;HLA-DRB1;HLA-DRB5;ICOS;IL15;IL2;IL4;IL5;IL6;ITGB7;LTBR;TGFB1;TNFRSF13C;TNFSF13;TNFSF13B
Meiotic recombination_Homo sapiens_R-HSA-912446	135	2	ATM;BRCA1;BRCA2;CDK2;CDK4;DMC1;H2AFX;H2AFZ;H3F3A;HIST1H2AB;HIST1H2AC;HIST1H2AD;HIST1H2AJ;HIST1H2BA;HIST1H2BB;HIST1H2BC;HIST1H2BD;HIST1H2BH;HIST1H2BK;HIST1H2BL;HIST1H2BM;HIST1H2BN;HIST1H2BO;HIST1H3A;HIST1H4A;HIST3H2BB;HIST3H3;MLH1;MLH3;MND1;MSH5;PSMC3IP;RAD50;TEX15
ER to Golgi transport vesicle membrane (GO:0012507)	136	2	CD74;CNIH3;FOLR1;GOSR2;HFE;HLA-A;HLA-B;HLA-C;HLA-DPA1;HLA-DPB1;HLA-DQA1;HLA-DQA2;HLA-DQB1;HLA-DQB2;HLA-DRA;HLA-DRB1;HLA-DRB5;HLA-E;HLA-F;HLA-G;LMAN1;PDCD6;SAR1B;SEC16A;SEC24A;TMED10;TMED7;VTI1A;VTI1B
Meiotic synapsis_Homo sapiens_R-HSA-1221632	138	2	ACD;ATR;BRCA1;H2AFX;H2AFZ;HIST1H2AB;HIST1H2AC;HIST1H2AD;HIST1H2AJ;HIST1H2BA;HIST1H2BB;HIST1H2BC;HIST1H2BD;HIST1H2BH;HIST1H2BK;HIST1H2BL;HIST1H2BM;HIST1H2BN;HIST1H2BO;HIST1H4A;HIST3H2BB;HIST3H3;HSPA2;LMNB1;SMC1B;SMC3;STAG1;STAG2;SUN2;SYCE2;SYNE2;TERF2IP;TEX12
B-WICH complex positively regulates rRNA expression_Homo sapiens_R-HSA-5250924	139	2	DEK;EP300;GSK3B;H2AFX;H2AFZ;H3F3A;HIST1H2AB;HIST1H2AC;HIST1H2AD;HIST1H2AJ;HIST1H2BA;HIST1H2BB;HIST1H2BC;HIST1H2BD;HIST1H2BH;HIST1H2BK;HIST1H2BL;HIST1H2BM;HIST1H2BN;HIST1H2BO;HIST1H3A;HIST1H4A;HIST3H2BB;KAT2A;POLR1B;POLR1C;POLR1D;POLR1E;POLR2F;POLR2H;SMARCA5;TAF1A;ZNRD1
Formation of the beta-catenin:TCF transactivating complex_Homo sapiens_R-HSA-201722	139	2	BCL9L;CDC73;CTNNB1;EP300;H2AFX;H2AFZ;H3F3A;HIST1H2AB;HIST1H2AC;HIST1H2AD;HIST1H2AJ;HIST1H2BA;HIST1H2BB;HIST1H2BC;HIST1H2BD;HIST1H2BH;HIST1H2BK;HIST1H2BL;HIST1H2BM;HIST1H2BN;HIST1H2BO;HIST1H3A;HIST1H4A;HIST3H2BB;HIST3H3;KMT2D;LEO1;RUVBL1;TCF7;TCF7L2;TERT;TLE4
Viral myocarditis	140	2	ABL1;ABL2;ACTG1;BID;CASP9;CCND1;CD28;CD40LG;CD80;CD86;CXADR;CYCS;DAG1;DMD;EIF4G1;HLA-A;HLA-B;HLA-C;HLA-DMA;HLA-DMB;HLA-DOA;HLA-DOB;HLA-DPA1;HLA-DPB1;HLA-DQA1;HLA-DQA2;HLA-DQB1;HLA-DRA;HLA-DRB1;HLA-DRB5;HLA-E;HLA-F;HLA-G;RAC3;SGCA;SGCG
nuclease activity (GO:0004518)	142	2	ANG;APEX1;DFFB;RNASE1;RNASE10;RNASE11;RNASE12;RNASE13;RNASE2;RNASE3;RNASE4;RNASE6;RNASE7;RNASE8;RNASE9
HDACs deacetylate histones_Homo sapiens_R-HSA-3214815	142	2	ARID4B;BRMS1;GATAD2A;GATAD2B;HDAC10;HDAC3;HDAC8;HIST1H2AA;HIST1H2AB;HIST1H2AC;HIST1H2AD;HIST1H2AG;HIST1H2AH;HIST1H2AJ;HIST1H2BA;HIST1H2BB;HIST1H2BC;HIST1H2BD;HIST1H2BH;HIST1H2BK;HIST1H2BL;HIST1H2BM;HIST1H2BN;HIST1H2BO;HIST1H3A;HIST1H4A;HIST2H2AA3;HIST2H2AB;HIST2H2AC;HIST2H2BE;HIST2H2BF;HIST2H3A;HIST3H2A;HIST3H2BB;HMG20B;MBD3;MTA2;PHF21A;RBBP7;SAP18;SAP30;SAP30L;TBL1X
Cytokine Signaling in Immune system_Homo sapiens_R-HSA-1280215	145	2	AAAS;ANGPT1;ARAF;ARRB1;BLNK;BRAF;BTC;CASP1;CD40LG;CISH;CNTFR;CSF2;CSF3R;CUL1;DDX58;DUSP1;DUSP2;DUSP4;DUSP6;DUSP7;EDAR;EGF;EIF4A3;EIF4E2;EIF4E3;EIF4G3;ERBB3;FBXW11;FGF10;FGF17;FGF18;FGF19;FGF3;FGF4;FGF5;FGFR4;GBP1;GBP2;GBP3;GBP4;GBP5;GBP6;GBP7;GDNF;GHR;GRB2;GRIN2C;HLA-A;HLA-B;HLA-C;HLA-DQA1;HLA-DQB1;HLA-DRA;HLA-DRB1;HLA-DRB5;HLA-E;HLA-F;HLA-G;IFIT1;IFIT2;IFIT3;IFNA1;IFNA10;IFNA14;IFNA16;IFNA17;IFN…
Arachidonic acid metabolism	146	2	ALOX12;ALOX12B;ALOX15;ALOX15B;CBR1;CBR3;CYP2U1;CYP4A11;CYP4A22;GGT1;GGT5;GPX2;GPX3;LTC4S;PLA2G12A;PLA2G16;PLA2G2A;PLA2G2C;PLA2G2D;PLA2G2E;PLA2G2F;PLA2G3;PLA2G4A;PLA2G5;PLA2G6;PTGES;PTGES2;PTGS2;TBXAS1
Retinol metabolism	151	2	ADH1A;ADH1B;ADH4;ADH5;ADH6;ADH7;ALDH1A1;ALDH1A2;CYP1A1;CYP1A2;CYP26B1;CYP2A6;CYP2B6;CYP2S1;DHRS4;DHRS4L2;HSD17B6;LRAT;RDH10;RDH16;RDH5;RETSAT;SDR16C5;UGT2A1;UGT2A2;UGT2A3;UGT2B10;UGT2B11;UGT2B15;UGT2B17;UGT2B28;UGT2B4;UGT2B7
Staphylococcus aureus infection	152	2	C1QA;C1QB;C1QC;C3;CFD;DEFA1;DEFA1B;DEFA3;DEFA4;DEFA5;DEFA6;DEFB1;DEFB103A;DEFB103B;DEFB4A;DEFB4B;FCGR2A;FCGR2B;FCGR3A;FCGR3B;PTAFR
ligand-gated ion channel activity (GO:0015276)	153	2	ANXA6;CHRFAM7A;CHRNA10;CHRNA2;CHRNA6;CHRNA7;CHRNA9;CHRNB1;CHRNB3;CHRND;CHRNE;CHRNG;CNGB1;DLG1;DLG3;DLG4;GABRA1;GABRA2;GABRA3;GABRA4;GABRA5;GABRA6;GABRB1;GABRB2;GABRB3;GABRE;GABRG1;GABRG2;GABRG3;GABRP;GABRQ;GLRA1;GLRA4;GLRB;GRIK1;GRIK5;HTR3C;HTR3D;HTR3E;NCALD;P2RX1;P2RX5;P2RX6;TRPV1
NoRC negatively regulates rRNA expression_Homo sapiens_R-HSA-427413	159	2	BAZ2A;CCNH;ERCC3;GTF2H4;H2AFX;H2AFZ;H3F3A;HIST1H2AB;HIST1H2AC;HIST1H2AD;HIST1H2AJ;HIST1H2BA;HIST1H2BB;HIST1H2BC;HIST1H2BD;HIST1H2BH;HIST1H2BK;HIST1H2BL;HIST1H2BM;HIST1H2BN;HIST1H2BO;HIST1H3A;HIST1H4A;HIST3H2BB;MNAT1;POLR1B;POLR1C;POLR1D;POLR1E;POLR2F;POLR2H;SAP130;SAP18;SAP30;SAP30BP;SIN3B;SMARCA5;TAF1A;TTF1;UBTF;ZNRD1
Positive epigenetic regulation of rRNA expression_Homo sapiens_R-HSA-5250913	159	2	CBX3;CHD4;DEK;EHMT2;EP300;GSK3B;H2AFX;H2AFZ;H3F3A;HIST1H2AB;HIST1H2AC;HIST1H2AD;HIST1H2AJ;HIST1H2BA;HIST1H2BB;HIST1H2BC;HIST1H2BD;HIST1H2BH;HIST1H2BK;HIST1H2BL;HIST1H2BM;HIST1H2BN;HIST1H2BO;HIST1H3A;HIST1H4A;HIST3H2BB;KAT2A;POLR1B;POLR1C;POLR1D;POLR1E;POLR2F;POLR2H;SMARCA5;TAF1A;TTF1;ZNRD1
Negative epigenetic regulation of rRNA expression_Homo sapiens_R-HSA-5250941	162	2	BAZ2A;CCNH;ERCC3;GTF2H4;H2AFX;H2AFZ;H3F3A;HIST1H2AB;HIST1H2AC;HIST1H2AD;HIST1H2AJ;HIST1H2BA;HIST1H2BB;HIST1H2BC;HIST1H2BD;HIST1H2BH;HIST1H2BK;HIST1H2BL;HIST1H2BM;HIST1H2BN;HIST1H2BO;HIST1H3A;HIST1H4A;HIST3H2BB;MNAT1;POLR1B;POLR1C;POLR1D;POLR1E;POLR2F;POLR2H;SAP130;SAP18;SAP30;SAP30BP;SIN3B;SMARCA5;TAF1A;TTF1;UBTF;ZNRD1
RNA Polymerase I Promoter Clearance_Homo sapiens_R-HSA-73854	162	2	CCNH;CHD4;EHMT2;ERCC3;GTF2H4;H2AFX;H2AFZ;H3F3A;HIST1H2AB;HIST1H2AC;HIST1H2AD;HIST1H2AJ;HIST1H2BA;HIST1H2BB;HIST1H2BC;HIST1H2BD;HIST1H2BH;HIST1H2BK;HIST1H2BL;HIST1H2BM;HIST1H2BN;HIST1H2BO;HIST1H3A;HIST1H4A;HIST3H2BB;KAT2A;MNAT1;POLR1B;POLR1C;POLR1D;POLR1E;POLR2F;POLR2H;TAF1A;TTF1;UBTF;ZNRD1
Antigen processing and presentation	163	2	B2M;CALR;CANX;CD4;CD74;CREB1;CTSL;HLA-A;HLA-B;HLA-C;HLA-DMA;HLA-DMB;HLA-DOA;HLA-DOB;HLA-DPA1;HLA-DPB1;HLA-DQA1;HLA-DQA2;HLA-DQB1;HLA-DRA;HLA-DRB1;HLA-DRB5;HLA-E;HLA-F;HLA-G;HSPA1A;HSPA1B;HSPA1L;HSPA2;HSPA4;HSPA5;HSPA8;IFI30;KLRC1;KLRC2;KLRC3;KLRC4;KLRD1;NFYA;PDIA3;PSME3;RFXANK;TAP1;TAP2;TAPBP;TNF
Developmental Biology_Homo sapiens_R-HSA-1266738	165	2	ABL1;ABL2;ABLIM1;ABLIM2;ABLIM3;ACTR3;ACVR1B;ACVR1C;ACVR2B;ADAM11;ADAM23;ADIPOQ;AGAP2;AKT2;AKT3;ALCAM;ANGPT1;ANK1;ANK2;AP2A2;AP2B1;AP2M1;AP2S1;ARHGAP35;ARHGAP39;ARHGEF12;ARHGEF7;ARPC2;ARPC4;ARRB2;ASH2L;BOC;CACNA1C;CACNA1D;CACNA1G;CACNA1I;CACNA1S;CACNB1;CACNB3;CACNG2;CAMK2A;CAMK2D;CAP2;CCND3;CD72;CDK4;CDK5R1;CDK8;CDX2;CEBPA;CEBPD;CFC1;CFL1;CHL1;CLASP1;CLASP2;CLTA;CLTB;CLTCL1;CNKSR2;CNOT6;CNTN1;CNTN…
RNA Polymerase I Transcription_Homo sapiens_R-HSA-73864	166	2	CBX3;CCNH;CHD4;EHMT2;ERCC3;GTF2H4;H2AFX;H2AFZ;H3F3A;HIST1H2AB;HIST1H2AC;HIST1H2AD;HIST1H2AJ;HIST1H2BA;HIST1H2BB;HIST1H2BC;HIST1H2BD;HIST1H2BH;HIST1H2BK;HIST1H2BL;HIST1H2BM;HIST1H2BN;HIST1H2BO;HIST1H3A;HIST1H4A;HIST3H2BB;KAT2A;MNAT1;POLR1B;POLR1C;POLR1D;POLR1E;POLR2F;POLR2H;PTRF;TAF1A;TTF1;UBTF;ZNRD1
Digestion of dietary carbohydrate_Homo sapiens_R-HSA-189085	167	2	AMY1A;AMY1B;AMY2A;AMY2B;LCT;MGAM;SI;TREH
nucleosome organization (GO:0034728)	168	2	ANP32B;ARID2;BRD2;CHAF1B;CTCF;DAXX;H1FOO;H2AFX;H2AFY;H3F3A;H3F3C;HIST1H2BA;HIST1H2BB;HIST1H2BC;HIST1H2BD;HIST1H2BH;HIST1H2BK;HIST1H2BL;HIST1H2BM;HIST1H2BN;HIST1H2BO;HIST1H3A;HIST1H4A;HIST1H4G;HIST3H2A;HIST3H2BB;HIST3H3;HMGA1;HMGB2;NFE2;PADI4;PBRM1;RNF8;SET;SETD2;SMARCA5;SMARCB1;SMARCC1;SMARCC2;SMARCD1;SMARCD3;SMARCE1;SOX9
negative regulation of transcription, DNA-templated (GO:0045892)	171	2	ADIPOQ;AEBP1;AES;AHR;ALX1;ARHGAP35;ARID5A;ARID5B;ATF5;ATF7IP;ATOH8;ATP8B1;ATXN1;AURKB;BACH1;BCL11A;BCL6;BCOR;BEND5;BHLHE40;BHLHE41;BIRC5;BMI1;BMP2;BMP6;BMP7;BPTF;BRCA1;BTRC;C1QBP;CALR;CBFA2T2;CBFA2T3;CBX2;CBX4;CBX6;CBX7;CBX8;CBY1;CC2D1A;CC2D1B;CCAR2;CD38;CDK5R1;CDKN1B;CDKN2A;CDX2;CEBPA;CHMP1A;CIPC;CIR1;CNOT7;COMMD7;CREB1;CREBBP;CREM;CTBP1;CTBP2;CTNNB1;DAB2IP;DACH1;DAP;DDX20;DDX5;DEPDC1;DICER1;DLX…
positive regulation of transcription from RNA polymerase II promoter (GO:0045944)	175	2	AATF;ABRA;ACVRL1;AHR;AHRR;AKAP8L;ALX1;ARF4;ARNTL2;ATF1;ATF3;ATF4;ATF5;BCL11B;BCL2L12;BMP4;BMP6;BRCA1;BRD4;CAPRIN2;CCDC62;CCNK;CDH13;CDK12;CDK7;CDK8;CDKN2B;CDX1;CEBPA;CEBPB;CEBPE;CEBPG;CHCHD2;CITED4;CKAP2;CLOCK;COPS5;CREB3L4;CREBRF;CRLF3;CRTC1;CRTC2;CRTC3;CRX;CSF3;CSRNP2;CTBP2;DBP;DDIT3;DDRGK1;DDX17;DLL1;DMRT1;DUX4;E2F7;EAPP;EBF3;EBF4;ECD;EFCAB7;EGFR;EHF;ELF1;ELL;EP300;ERG;ETV4;FGFR2;FLCN;FOXA1;FO…
Meiosis_Homo sapiens_R-HSA-1500620	176	2	ACD;ATM;ATR;BRCA1;BRCA2;CDK2;CDK4;DMC1;H2AFX;H2AFZ;H3F3A;HIST1H2AB;HIST1H2AC;HIST1H2AD;HIST1H2AJ;HIST1H2BA;HIST1H2BB;HIST1H2BC;HIST1H2BD;HIST1H2BH;HIST1H2BK;HIST1H2BL;HIST1H2BM;HIST1H2BN;HIST1H2BO;HIST1H3A;HIST1H4A;HIST3H2BB;HIST3H3;HSPA2;LMNB1;MLH1;MLH3;MND1;MSH5;PSMC3IP;RAD50;SMC1B;SMC3;STAG1;STAG2;SUN2;SYCE2;SYNE2;TERF2IP;TEX12;TEX15
DNA cytosine deamination (GO:0070383)	179	2	APOBEC3A;APOBEC3C;APOBEC3D;APOBEC3F;APOBEC3G;APOBEC3H;CDADC1
Oxidative Stress Induced Senescence_Homo sapiens_R-HSA-2559580	180	2	AGO1;AGO3;AGO4;CBX2;CBX4;CBX6;CBX8;CDK4;CDKN2A;CDKN2B;E2F3;EZH2;FOS;H2AFX;H2AFZ;H3F3A;HIST1H2AB;HIST1H2AC;HIST1H2AD;HIST1H2AJ;HIST1H2BA;HIST1H2BB;HIST1H2BC;HIST1H2BD;HIST1H2BH;HIST1H2BK;HIST1H2BL;HIST1H2BM;HIST1H2BN;HIST1H2BO;HIST1H3A;HIST1H4A;HIST3H2BB;IFNB1;MAP2K6;MAP3K5;MAPK1;MAPK11;MAPK14;MAPKAPK3;PHC3;RING1;SUZ12;TFDP1;TNIK;TNRC6B;TNRC6C;TXN;UBA52
Pancreatic secretion	186	2	ADCY5;AMY2A;AMY2B;ATP1B3;ATP2B1;CELA2A;CELA2B;CELA3A;CELA3B;CLCA1;CLCA2;CLCA4;CPA3;CPB1;CPB2;PLA2G12A;PLA2G2A;PLA2G2C;PLA2G2D;PLA2G2E;PLA2G2F;PLA2G3;PLA2G5;PRSS1;SCTR;SLC9A1;TRPC1
